# Supplementary material for: Deciphering preferred solid-state conformations in nitrogen-containing bisphosphonates and their coordination compounds. A case study of discrete Cu(ii) complexes based on Cα-substituted analogues of zoledronic acid: crystal structures and solid-state characterization
Source: Royal Society of Chemistry journal article supplement (doi:10.1039/c9ce00614a), 2019-01-01
Supplement: c9ce00614a1.pdf [file c9ce00614a1.pdf]

Supplementary Information (ESI) for the paper

Deciphering preferred solid-state conformations in nitrogen-containing bisphosphonates and their coordination compounds. A case study of discrete Cu(II) complexes based on C<sub>α</sub>-substituted analogues of zoledronic acid: crystal structures and solid state characterization

Tomasz Rojek,<sup>a</sup> Waldemar Goldeman,<sup>a</sup> Katarzyna Ślepokura<sup>b</sup>, Wiktor Zierkiewicz<sup>a</sup> and Ewa Matczak-Jon<sup>\*a</sup>

<sup>a</sup>Department of Chemistry, Wrocław University of Science and Technology, Wybrzeże Wyspiańskiego 27, 50-370 Wrocław, Poland. E-mail: ewa.matczak-jon@pwr.edu.pl

<sup>b</sup>Faculty of Chemistry, University of Wrocław, Joliot-Curie 14, 50-383 Wrocław, Poland.

**Table S1.** The list of crystal structures based on selected bisphosphonate ligands with the recognition of their conformation around C<sub>α</sub>-C bond.

| Lp.            | Database refcode | Formula <sup>a</sup>                                                                | Space group                          | Dimensionality     | Ligand conformation <sup>b</sup> |    | Source |                                                                                                         |
|----------------|------------------|-------------------------------------------------------------------------------------|--------------------------------------|--------------------|----------------------------------|----|--------|---------------------------------------------------------------------------------------------------------|
|                |                  |                                                                                     |                                      |                    | I                                | II |        |                                                                                                         |
| <b>Ligands</b> |                  |                                                                                     |                                      |                    |                                  |    |        |                                                                                                         |
| 1.             | SOPSEV           | 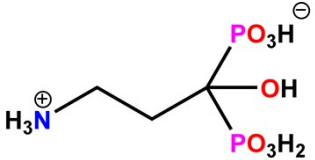   | H <sub>4</sub> Pam                   | P2 <sub>1</sub>    | -                                | ✓  | ✗      | L. M. Shkol'nikova <i>et al.</i> , <i>Kristallografiya</i> , <b>35</b> (1990) 1442                      |
| 2.             | GOWZEX           |    | H <sub>4</sub> Ale                   | P2 <sub>1</sub> /n | -                                | ✓  | ✗      | J. Ohanessian <i>et al.</i> , <i>Phosphorus, Sulfur Silicon Relat. Elem.</i> , <b>129</b> (1997) 99-110 |
|                | KOJGUL           |                                                                                     | H <sub>4</sub> Ale·H <sub>2</sub> O  | P2 <sub>1</sub> /n | -                                | ✓  | ✗      | Y. Leroux <i>et al.</i> , <i>Phosphorus, Sulfur Silicon Relat. Elem.</i> , <b>63</b> (1991) 181-191     |
| 3.             | VUYTUE           |    | H <sub>4</sub> Ner                   | P2 <sub>1</sub> /c | -                                | ✓  | ✗      | V. M. Coiro <i>et al.</i> , <i>Acta Cryst.</i> , <b>C45</b> (1989) 446-448                              |
| 4.             | MEYGII           |   | H <sub>4</sub> Zol                   | P $\bar{1}$        | -                                | ✓  | ✗      | V. V. Chernyshev <i>et al.</i> , <i>Acta Cryst.</i> , <b>C69</b> (2013) 263-266                         |
|                | BEKBOJ           |                                                                                     | H <sub>4</sub> Zol·H <sub>2</sub> O  | P $\bar{1}$        | -                                | ✓  | ✗      | J. M. Sanders <i>et al.</i> , <i>J. Med. Chem.</i> , <b>46</b> (2003) 5171-5183                         |
|                | ORUZEH           |                                                                                     | H <sub>4</sub> Zol·3H <sub>2</sub> O | P $\bar{1}$        | -                                | ✓  | ✗      | R. Ruscica <i>et al.</i> , <i>J. Pharm. Sci.</i> , <b>99</b> (2010) 4962-4972                           |
| 5.             | MOFVOS           |  | H <sub>4</sub> Ris·H <sub>2</sub> O  | P2 <sub>1</sub> /n | -                                | ✓  | ✗      | C. Barbey <i>et al.</i> , <i>Z. Kristallogr. - New Cryst. Struct.</i> , <b>217</b> (2002) 137-138       |

|     |          |                                                                                     |                                     |            |   |   |   |                                                                                                         |
|-----|----------|-------------------------------------------------------------------------------------|-------------------------------------|------------|---|---|---|---------------------------------------------------------------------------------------------------------|
| 6.  | UPAVUD   | 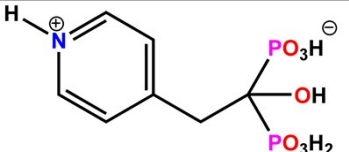   | H <sub>4</sub> 4py-Ris              | $P2_1/n$   | - | ✓ | ✗ | F.-L. Wang <i>et al.</i> , <i>Acta Cryst.</i> , <b>E67</b> (2011) o1025                                 |
| 7.  | BIZWAI02 |    | H <sub>4</sub> Min·H <sub>2</sub> O | $P\bar{1}$ | - | ✓ | ✗ | A. Airoldi <i>et al.</i> , <i>Acta Cryst.</i> , <b>E71</b> (2015) 51-54                                 |
| 8.  | WETQES   |    | H <sub>4</sub> Tra                  | $P2_1/c$   | - | ✓ | ✗ | J. Mao <i>et al.</i> , <i>J. Am. Chem. Soc.</i> , <b>128</b> (2006) 14485-14497                         |
| 9.  | FURCAW   |    | H <sub>4</sub> Olp·H <sub>2</sub> O | $P2_1/n$   | - | ✗ | ✓ | L. M. Shkol'nikova <i>et al.</i> , <i>Izv. Akad. Nauk SSSR, Ser. Khim.</i> , <b>36</b> (1987) 1394-1399 |
| 10. | GADPAD   |   | H <sub>4</sub> Prp                  | $P2_1/n$   | - | ✗ | ✓ | D. Fernandez <i>et al.</i> , <i>Acta Cryst.</i> , <b>C59</b> (2003) o228-o230                           |
| 11. | EMIGIQ   |  | H <sub>4</sub> Ppp                  | $P2_1/c$   | - | ✓ | ✗ | D. Fernandez <i>et al.</i> , <i>Acta Cryst.</i> , <b>C59</b> (2003) o661-o663                           |

| 1. H <sub>4</sub> Pam |                     |                                                                                                        |                                   |                  |   |   |                                                                                      |
|-----------------------|---------------------|--------------------------------------------------------------------------------------------------------|-----------------------------------|------------------|---|---|--------------------------------------------------------------------------------------|
| 1.                    | FENREW              | Na(H <sub>3</sub> Pam)·5H <sub>2</sub> O                                                               | <i>P</i> $\bar{1}$                | org.-inorg. salt | ✓ | ✗ | K. Stahl <i>et al.</i> , <i>Acta Cryst.</i> , E <b>61</b> (2005) m132-m134           |
| 2.                    | EFAMIH              | Na <sub>2</sub> (H <sub>2</sub> Pam)·5H <sub>2</sub> O                                                 | <i>P</i> $\bar{1}$                | org.-inorg. salt | ✓ | ✗ | D. Vega <i>et al.</i> , <i>Acta Cryst.</i> , C <b>58</b> (2002) m77-m80              |
| 3.                    | IDAWIV              | [Co(H <sub>3</sub> Pam) <sub>2</sub> (H <sub>2</sub> O) <sub>2</sub> ]                                 | <i>P2</i> <sub>1</sub> / <i>c</i> | 0D               | ✓ | ✗ | N. V. Tsaryk <i>et al.</i> , <i>Acta Cryst.</i> , E <b>67</b> (2011) m1694           |
| 4.                    | INIYUZ              | [Zn(H <sub>3</sub> Pam) <sub>2</sub> (H <sub>2</sub> O) <sub>2</sub> ]                                 | <i>P2</i> <sub>1</sub> / <i>n</i> | 0D               | ✓ | ✗ | D. Fernandez <i>et al.</i> , <i>Acta Cryst.</i> , C <b>60</b> (2004) m73-m75         |
| 5.                    | FAZVUZ              | [Ni(H <sub>3</sub> Pam) <sub>2</sub> (H <sub>2</sub> O) <sub>2</sub> ]                                 | <i>P2</i> <sub>1</sub> / <i>n</i> | 0D               | ✓ | ✗ | B. Demoro <i>et al.</i> , <i>Dalton Trans.</i> , <b>41</b> (2012) 6468-6476          |
| 6.                    | XEHTOU              | [Ni <sub>2</sub> (H <sub>3</sub> Pam) <sub>4</sub> (H <sub>2</sub> O) <sub>2</sub> ]·2H <sub>2</sub> O | <i>P2</i> <sub>1</sub> / <i>c</i> | 0D               | ✓ | ✓ | Y. Gong <i>et al.</i> , <i>Inorg. Chem.</i> , <b>45</b> (2006) 4987-4995             |
| 7.                    | DILTID              | [Cu(2,2'-bpy)(H <sub>3</sub> Pam)(Cl)(H <sub>2</sub> O)]·2H <sub>2</sub> O                             | <i>P</i> $\bar{1}$                | 0D               | ✓ | ✗ | K. D. Demadis <i>et al.</i> , <i>Cryst. Growth Des.</i> , <b>13</b> (2013) 4480-4489 |
| 8.                    | KEVVOX01            | [Cu(H <sub>2</sub> Pam)]·H <sub>2</sub> O                                                              | <i>P2</i> <sub>1</sub> / <i>c</i> | 1D               | ✓ | ✗ | G. Li <i>et al.</i> , <i>J. Coord. Chem.</i> , <b>61</b> (2008) 540-549              |
| 9.                    | TAMMAX              | [Ca(H <sub>2</sub> Pam)(H <sub>2</sub> O)]·H <sub>2</sub> O                                            | <i>Pna2</i> <sub>1</sub>          | 1D               | ✓ | ✗ | D. Liu <i>et al.</i> , <i>Chem. Commun.</i> , <b>48</b> (2012) 2668-2670             |
| 10.                   | XEHTAG              | [Mn(H <sub>2</sub> Pam)]·H <sub>2</sub> O                                                              | <i>P</i> $\bar{1}$                | 1D               | ✓ | ✗ | Y. Gong <i>et al.</i> , <i>Inorg. Chem.</i> , <b>45</b> (2006) 4987-4995             |
| 11.                   | XEHTEK              | [Co(H <sub>2</sub> Pam)]·H <sub>2</sub> O                                                              | <i>P</i> $\bar{1}$                | 1D               | ✓ | ✗ | Y. Gong <i>et al.</i> , <i>Inorg. Chem.</i> , <b>45</b> (2006) 4987-4995             |
| 12.                   | BACMUP <sup>c</sup> | [Zn(H <sub>3</sub> Pam) <sub>2</sub> ]                                                                 | <i>C2</i> / <i>c</i>              | 2D               | ✓ | ✗ | H. A. Habib <i>et al.</i> , <i>Polyhedron</i> , <b>29</b> (2010) 2537-2545           |
| 13.                   | XEHTUA              | [Zn(H <sub>2</sub> Pam)]·H <sub>2</sub> O                                                              | <i>P2</i> <sub>1</sub> / <i>c</i> | 2D               | ✗ | ✓ | Y. Gong <i>et al.</i> , <i>Inorg. Chem.</i> , <b>45</b> (2006) 4987-4995             |
| 14.                   | XEHTIO              | [Cu <sub>3</sub> (HPam) <sub>2</sub> (H <sub>2</sub> O) <sub>2</sub> ]                                 | <i>P2</i> <sub>1</sub> / <i>n</i> | 3D               | ✓ | ✗ | Y. Gong <i>et al.</i> , <i>Inorg. Chem.</i> , <b>45</b> (2006) 4987-4995             |
| 15.                   | XOTRIJ              | [Eu(HPam)]                                                                                             | <i>Pnma</i>                       | 3D               | ✗ | ✓ | R. Fu <i>et al.</i> , <i>Cryst. Growth Des.</i> , <b>14</b> (2014) 6197-6204         |

|                            |          |                                                                                                        |                         |                  |   |   |                                                                                     |
|----------------------------|----------|--------------------------------------------------------------------------------------------------------|-------------------------|------------------|---|---|-------------------------------------------------------------------------------------|
| 16.                        | XOTROP   | [Tb(HPam)]                                                                                             | <i>Pnma</i>             | 3D               | * | ✓ | R. Fu <i>et al.</i> , <i>Cryst. Growth Des.</i> , <b>14</b> (2014) 6197-6204        |
| 17.                        | XOTRUV   | [Sm(HPam)]                                                                                             | <i>Pnma</i>             | 3D               | * | ✓ | R. Fu <i>et al.</i> , <i>Cryst. Growth Des.</i> , <b>14</b> (2014) 6197-6204        |
| 18.                        | XOTSAC   | [Nd(HPam)]                                                                                             | <i>P2<sub>1</sub>/c</i> | 3D               | * | ✓ | R. Fu <i>et al.</i> , <i>Cryst. Growth Des.</i> , <b>14</b> (2014) 6197-6204        |
| <b>2. H<sub>4</sub>Ale</b> |          |                                                                                                        |                         |                  |   |   |                                                                                     |
| 1.                         | EJEZUP   | Li[(H <sub>3</sub> Ale)(H <sub>2</sub> O) <sub>2</sub> ]                                               | <i>P2<sub>1</sub>/c</i> | org.-inorg. salt | * | ✓ | G. B. Deacon <i>et al.</i> , <i>J. Coord. Chem.</i> , <b>64</b> (2011) 179-185      |
| 2.                         | TEHWOS   | Na(H <sub>3</sub> Ale)·3H <sub>2</sub> O                                                               | <i>P2<sub>1</sub>/n</i> | org.-inorg. salt | ✓ | * | D. Vega <i>et al.</i> , <i>Acta Cryst.</i> , <b>C52</b> (1996) 2198-2201            |
| 3.                         | PUQHAM   | Na <sub>2</sub> [(H <sub>2</sub> Ale)(H <sub>2</sub> O) <sub>4</sub> ]·H <sub>2</sub> O                | <i>P2<sub>1</sub>/c</i> | org.-inorg. salt | ✓ | * | G. B. Deacon <i>et al.</i> , <i>Cryst. Growth Des.</i> , <b>15</b> (2015) 4646-4662 |
| 4.                         | PUQFOY   | 2[K(H <sub>3</sub> Ale)]·3H <sub>2</sub> O                                                             | <i>P2<sub>1</sub>/c</i> | org.-inorg. salt | ✓ | * | G. B. Deacon <i>et al.</i> , <i>Cryst. Growth Des.</i> , <b>15</b> (2015) 4646-4662 |
| 5.                         | PUQHEQ   | K <sub>2</sub> [(H <sub>2</sub> Ale)(H <sub>2</sub> O) <sub>6</sub> ]                                  | <i>P1</i>               | org.-inorg. salt | ✓ | * | G. B. Deacon <i>et al.</i> , <i>Cryst. Growth Des.</i> , <b>15</b> (2015) 4646-4662 |
| 6.                         | PUQFUE   | K <sub>2</sub> [(H <sub>3</sub> Ale) <sub>2</sub> (H <sub>2</sub> O) <sub>2</sub> ]·2H <sub>2</sub> O  | <i>C2/c</i>             | org.-inorg. salt | ✓ | * | G. B. Deacon <i>et al.</i> , <i>Cryst. Growth Des.</i> , <b>15</b> (2015) 4646-4662 |
| 7.                         | PUQGAL01 | Rb[(H <sub>3</sub> Ale)(H <sub>2</sub> O)]·H <sub>2</sub> O                                            | <i>P2<sub>1</sub>/c</i> | org.-inorg. salt | ✓ | * | G. B. Deacon <i>et al.</i> , <i>Cryst. Growth Des.</i> , <b>15</b> (2015) 4646-4662 |
| 8.                         | PUQGOZ   | Rb[(H <sub>3</sub> Ale)(H <sub>4</sub> Ale)]·2H <sub>2</sub> O                                         | <i>P2<sub>1</sub>/c</i> | org.-inorg. salt | ✓ | * | G. B. Deacon <i>et al.</i> , <i>Cryst. Growth Des.</i> , <b>15</b> (2015) 4646-4662 |
| 9.                         | PUQGAL   | Rb <sub>2</sub> [(H <sub>3</sub> Ale) <sub>2</sub> (H <sub>2</sub> O) <sub>2</sub> ]·2H <sub>2</sub> O | <i>C2/c</i>             | org.-inorg. salt | ✓ | * | G. B. Deacon <i>et al.</i> , <i>Cryst. Growth Des.</i> , <b>15</b> (2015) 4646-4662 |
| 10.                        | PUQHIU   | Rb <sub>2</sub> [(H <sub>2</sub> Ale)(H <sub>2</sub> O) <sub>5</sub> ]·H <sub>2</sub> O                | <i>P2<sub>1</sub>/n</i> | org.-inorg. salt | ✓ | * | G. B. Deacon <i>et al.</i> , <i>Cryst. Growth Des.</i> , <b>15</b> (2015) 4646-4662 |
| 11.                        | PUQHOA   | Rb <sub>4</sub> [(H <sub>2</sub> Ale) <sub>2</sub> (H <sub>2</sub> O) <sub>8</sub> ]·H <sub>2</sub> O  | <i>P1</i>               | org.-inorg. salt | ✓ | * | G. B. Deacon <i>et al.</i> , <i>Cryst. Growth Des.</i> , <b>15</b> (2015) 4646-4662 |
| 12.                        | PUQGIT   | Cs[(H <sub>3</sub> Ale)(H <sub>2</sub> O)]·H <sub>2</sub> O                                            | <i>P2<sub>1</sub>/c</i> | org.-inorg. salt | ✓ | * | G. B. Deacon <i>et al.</i> , <i>Cryst. Growth Des.</i> , <b>15</b> (2015) 4646-4662 |

|     |        |                                                                                                        |              |                  |   |   |                                                                                      |
|-----|--------|--------------------------------------------------------------------------------------------------------|--------------|------------------|---|---|--------------------------------------------------------------------------------------|
| 13. | PUQGUF | Cs[(H <sub>3</sub> Ale)(H <sub>4</sub> Ale)]·2H <sub>2</sub> O                                         | $P\bar{1}$   | org.-inorg. salt | ✓ | ✗ | G. B. Deacon <i>et al.</i> , <i>Cryst. Growth Des.</i> , <b>15</b> (2015) 4646-4662  |
| 14. | PUQJAO | Cs <sub>2</sub> [(H <sub>2</sub> Ale)(H <sub>2</sub> O) <sub>4</sub> ]                                 | $P\bar{1}$   | org.-inorg. salt | ✓ | ✗ | G. B. Deacon <i>et al.</i> , <i>Cryst. Growth Des.</i> , <b>15</b> (2015) 4646-4662  |
| 15. | PUQHUG | Cs <sub>4</sub> [(H <sub>2</sub> Ale) <sub>2</sub> (H <sub>2</sub> O) <sub>9</sub> ]·2H <sub>2</sub> O | $P\bar{1}$   | org.-inorg. salt | ✓ | ✗ | G. B. Deacon <i>et al.</i> , <i>Cryst. Growth Des.</i> , <b>15</b> (2015) 4646-4662  |
| 16. | VEFBEQ | (H <sub>2</sub> en)(H <sub>2</sub> Ale)·2H <sub>2</sub> O                                              | <i>Pbca</i>  | org.-org. salt   | ✓ | ✗ | G. B. Deacon <i>et al.</i> , <i>CrystEngComm</i> , <b>19</b> (2017) 5611-5621        |
| 17. | VEFBIU | (H <sub>2</sub> meen)(H <sub>2</sub> Ale)·3H <sub>2</sub> O                                            | $P2_1/c$     | org.-org. salt   | ✓ | ✗ | G. B. Deacon <i>et al.</i> , <i>CrystEngComm</i> , <b>19</b> (2017) 5611-5621        |
| 18. | VEFBOA | (H <sub>2</sub> me <sub>2</sub> en)(H <sub>2</sub> Ale)·3.5H <sub>2</sub> O                            | $P2_1/n$     | org.-org. salt   | ✓ | ✗ | G. B. Deacon <i>et al.</i> , <i>CrystEngComm</i> , <b>19</b> (2017) 5611-5621        |
| 19. | VEFBUG | (H <sub>2</sub> et <sub>2</sub> en)(H <sub>2</sub> Ale)·2H <sub>2</sub> O                              | $P2_12_12_1$ | org.-org. salt   | ✓ | ✗ | G. B. Deacon <i>et al.</i> , <i>CrystEngComm</i> , <b>19</b> (2017) 5611-5621        |
| 20. | VEFCAN | (H <sub>2</sub> chda)(H <sub>2</sub> Ale)·3H <sub>2</sub> O                                            | $P\bar{1}$   | org.-org. salt   | ✓ | ✗ | G. B. Deacon <i>et al.</i> , <i>CrystEngComm</i> , <b>19</b> (2017) 5611-5621        |
| 21. | VEFCER | (H <sub>2</sub> xda)(H <sub>2</sub> Ale)·3H <sub>2</sub> O                                             | $P2_1/c$     | org.-org. salt   | ✓ | ✗ | G. B. Deacon <i>et al.</i> , <i>CrystEngComm</i> , <b>19</b> (2017) 5611-5621        |
| 22. | VEFCIV | (H <sub>2</sub> oda)(H <sub>2</sub> Ale)·2H <sub>2</sub> O·0.5EtOH                                     | $C2/c$       | org.-org. salt   | ✓ | ✗ | G. B. Deacon <i>et al.</i> , <i>CrystEngComm</i> , <b>19</b> (2017) 5611-5621        |
| 23. | VEFCOB | (Hphea) <sub>2</sub> (H <sub>2</sub> Ale)·2H <sub>2</sub> O                                            | $P\bar{1}$   | org.-org. salt   | ✓ | ✗ | G. B. Deacon <i>et al.</i> , <i>CrystEngComm</i> , <b>19</b> (2017) 5611-5621        |
| 24. | VEFCUH | (Hmel) <sub>2</sub> (H <sub>2</sub> Ale)·7H <sub>2</sub> O                                             | $P2_1/c$     | org.-org. salt   | ✗ | ✓ | G. B. Deacon <i>et al.</i> , <i>CrystEngComm</i> , <b>19</b> (2017) 5611-5621        |
| 25. | DILTEZ | [Cu(2,2'-bpy)(H <sub>3</sub> Ale)(Cl)]·4H <sub>2</sub> O                                               | $C2/c$       | 0D               | ✓ | ✗ | K. D. Demadis <i>et al.</i> , <i>Cryst. Growth Des.</i> , <b>13</b> (2013) 4480-4489 |
| 26. | ACUZUP | [Ni <sub>2</sub> (H <sub>3</sub> Ale) <sub>4</sub> (H <sub>2</sub> O) <sub>2</sub> ]·2H <sub>2</sub> O | $P2_1/c$     | 0D               | ✓ | ✓ | M. Sikorska <i>et al.</i> , <i>Acta Cryst.</i> , <b>E68</b> (2012) m820-m821         |
| 27. | FAZVOT | [Cu <sub>2</sub> (H <sub>3</sub> Ale) <sub>4</sub> (H <sub>2</sub> O) <sub>2</sub> ]·2H <sub>2</sub> O | $P2_1/c$     | 0D               | ✓ | ✓ | B. Demoro <i>et al.</i> , <i>Dalton Trans.</i> , <b>41</b> (2012) 6468-6476          |
| 28. | ICUVOS | [Co <sub>2</sub> (H <sub>3</sub> Ale) <sub>4</sub> (H <sub>2</sub> O) <sub>2</sub> ]·2H <sub>2</sub> O | $P2_1/c$     | 0D               | ✓ | ✓ | S. P. Man <i>et al.</i> , <i>Polyhedron</i> , <b>25</b> (2006) 1017-1032             |

|                            |        |                                                                                                                                            |                                                       |                  |   |   |                                                                                      |
|----------------------------|--------|--------------------------------------------------------------------------------------------------------------------------------------------|-------------------------------------------------------|------------------|---|---|--------------------------------------------------------------------------------------|
| 29.                        | GIKPEW | [Mn(H <sub>2</sub> Ale)]·H <sub>2</sub> O                                                                                                  | <i>P</i> 2 <sub>1</sub> / <i>c</i>                    | 1D               | ✓ | ✗ | Z.-C. Zhang <i>et al.</i> , <i>Inorg. Chem. Commun.</i> , <b>10</b> (2007) 1063-1066 |
| 30.                        | LILQII | [Ca(H <sub>2</sub> Ale)]·H <sub>2</sub> O                                                                                                  | <i>P</i> 2 <sub>1</sub> 2 <sub>1</sub> 2 <sub>1</sub> | 1D               | ✓ | ✗ | E. Alvarez <i>et al.</i> , <i>CrystEngComm</i> , <b>15</b> (2013) 9899-9905          |
| <b>3. H<sub>4</sub>Ner</b> |        |                                                                                                                                            |                                                       |                  |   |   |                                                                                      |
| 1.                         | ICUTOQ | [Co(H <sub>3</sub> Ner) <sub>2</sub> (H <sub>2</sub> O) <sub>2</sub> ]·2H <sub>2</sub> O                                                   | <i>P</i> 2 <sub>1</sub> / <i>c</i>                    | 0D               | ✓ | ✗ | S. P. Man <i>et al.</i> , <i>Polyhedron</i> , <b>25</b> (2006) 1017-1032             |
| 2.                         | ICUTUW | [Ni(H <sub>3</sub> Ner) <sub>2</sub> (H <sub>2</sub> O) <sub>2</sub> ]·2H <sub>2</sub> O                                                   | <i>P</i> 2 <sub>1</sub> / <i>c</i>                    | 0D               | ✓ | ✗ | S. P. Man <i>et al.</i> , <i>Polyhedron</i> , <b>25</b> (2006) 1017-1032             |
| 3.                         | ICUVAE | [Zn(H <sub>3</sub> Ner) <sub>2</sub> (H <sub>2</sub> O) <sub>2</sub> ]·2H <sub>2</sub> O                                                   | <i>P</i> 2 <sub>1</sub> / <i>c</i>                    | 0D               | ✓ | ✗ | S. P. Man <i>et al.</i> , <i>Polyhedron</i> , <b>25</b> (2006) 1017-1032             |
| 4.                         | ICUVEI | [Mn <sub>2</sub> (H <sub>3</sub> Ner) <sub>4</sub> (H <sub>2</sub> O) <sub>2</sub> ]·2H <sub>2</sub> O                                     | <i>P</i> 2 <sub>1</sub> / <i>n</i>                    | 0D               | ✓ | ✗ | S. P. Man <i>et al.</i> , <i>Polyhedron</i> , <b>25</b> (2006) 1017-1032             |
| 5.                         | ICUVIM | [Cd <sub>2</sub> (H <sub>3</sub> Ner) <sub>4</sub> (H <sub>2</sub> O) <sub>2</sub> ]·2H <sub>2</sub> O                                     | <i>P</i> 2 <sub>1</sub> / <i>n</i>                    | 0D               | ✓ | ✓ | S. P. Man <i>et al.</i> , <i>Polyhedron</i> , <b>25</b> (2006) 1017-1032             |
| <b>4. H<sub>4</sub>Zol</b> |        |                                                                                                                                            |                                                       |                  |   |   |                                                                                      |
| 1.                         | KUQYIF | Na <sub>3</sub> [(H <sub>3</sub> Zol) <sub>2</sub> (H <sub>3.5</sub> Zol) <sub>2</sub> (H <sub>2</sub> O) <sub>4</sub> ]·2H <sub>2</sub> O | <i>P</i> $\bar{1}$                                    | org.-inorg. salt | ✓ | ✗ | E. Freire <i>et al.</i> , <i>Acta Cryst.</i> , <b>C66</b> (2010) m122-m126           |
| 2.                         | DULFOG | K[(H <sub>3</sub> Zol)(H <sub>2</sub> O)]·H <sub>2</sub> O                                                                                 | <i>P</i> $\bar{1}$                                    | org.-inorg. salt | ✓ | ✗ | E. Freire <i>et al.</i> , <i>Acta Cryst.</i> , <b>C66</b> (2010) m13-m16             |
| 3.                         | JAPJOC | (NH <sub>4</sub> ) <sub>2</sub> (H <sub>2</sub> Zol)·2H <sub>2</sub> O                                                                     | <i>P</i> $\bar{1}$                                    | org.-inorg. salt | ✓ | ✗ | M. Sikorska <i>et al.</i> , <i>J. Crystallogr.</i> , <b>2013</b> (2013) 1-5          |
| 4.                         | ENODIV | (Hcyt)(H <sub>3</sub> Zol)·3H <sub>2</sub> O                                                                                               | <i>P</i> $\bar{1}$                                    | org.-org. salt   | ✓ | ✗ | B. Sridhar <i>et al.</i> , <i>Acta Cryst.</i> , <b>C67</b> (2011) o115-o119          |
| 5.                         | SIXZUW | (Hade) <sub>2</sub> (H <sub>2</sub> Zol)·4H <sub>2</sub> O                                                                                 | <i>P</i> 2 <sub>1</sub> / <i>n</i>                    | org.-org. salt   | ✓ | ✗ | B. Sridhar <i>et al.</i> , <i>Acta Cryst.</i> , <b>C70</b> (2014) 67-74              |
| 6.                         | SIYBAF | (Hade) <sub>2</sub> (H <sub>2</sub> Zol)·6H <sub>2</sub> O                                                                                 | <i>P</i> $\bar{1}$                                    | org.-org. salt   | ✓ | ✗ | B. Sridhar <i>et al.</i> , <i>Acta Cryst.</i> , <b>C70</b> (2014) 67-74              |
| 7.                         | YAGXEL | (Hdcha) <sub>3</sub> (HZol)·H <sub>2</sub> O·EtOH                                                                                          | <i>P</i> $\bar{1}$                                    | org.-org. salt   | ✓ | ✗ | A. Sarkar <i>et al.</i> , <i>Acta Cryst.</i> , <b>E67</b> (2011) o2980               |
| 8.                         | TUVZAM | [Mg(H <sub>3</sub> Zol) <sub>2</sub> (H <sub>2</sub> O) <sub>2</sub> ]                                                                     | <i>P</i> $\bar{1}$                                    | 0D               | ✓ | ✗ | E. Freire <i>et al.</i> , <i>Acta Cryst.</i> , <b>C66</b> (2010) m166-m170           |

|     |        |                                                                                                                                                                                |            |    |   |   |                                                                                    |
|-----|--------|--------------------------------------------------------------------------------------------------------------------------------------------------------------------------------|------------|----|---|---|------------------------------------------------------------------------------------|
| 9.  | VIMXOF | [Co(H <sub>3</sub> Zol) <sub>2</sub> (H <sub>2</sub> O) <sub>2</sub> ]                                                                                                         | $P\bar{1}$ | 0D | ✓ | ✗ | D.-K. Cao <i>et al.</i> , <i>Inorg. Chem.</i> , <b>46</b> (2007) 7571-7578         |
| 10. | VIMXUL | [Ni(H <sub>3</sub> Zol) <sub>2</sub> (H <sub>2</sub> O) <sub>2</sub> ]                                                                                                         | $P\bar{1}$ | 0D | ✓ | ✗ | D.-K. Cao <i>et al.</i> , <i>Inorg. Chem.</i> , <b>46</b> (2007) 7571-7578         |
| 11. | RUPXAC | [Mn(H <sub>3</sub> Zol) <sub>2</sub> (H <sub>2</sub> O) <sub>2</sub> ]                                                                                                         | $P\bar{1}$ | 0D | ✓ | ✗ | Z.-C. Zhang <i>et al.</i> , <i>Acta Cryst.</i> , <b>E65</b> (2009) m1701-m1702     |
| 12. | PUFXUK | [Zn(H <sub>3</sub> Zol) <sub>2</sub> (H <sub>2</sub> O) <sub>2</sub> ]                                                                                                         | $P\bar{1}$ | 0D | ✓ | ✗ | E. Freire <i>et al.</i> , <i>Acta Cryst.</i> , <b>E65</b> (2009) m1428-m1429       |
| 13. | PUFYAR | [Zn(H <sub>3</sub> Zol) <sub>2</sub> (H <sub>2</sub> O)]·2H <sub>2</sub> O                                                                                                     | $C2/c$     | 0D | ✓ | ✗ | E. Freire <i>et al.</i> , <i>Acta Cryst.</i> , <b>E65</b> (2009) m1430-m1431       |
| 14. | DOGYII | [Cu(H <sub>3</sub> Zol) <sub>2</sub> ]                                                                                                                                         | $P\bar{1}$ | 0D | ✓ | ✗ | D.-K. Cao <i>et al.</i> , <i>Dalton Trans.</i> , <b>0</b> (2008) 5008-5015         |
| 15. | DOGYEE | [Cu(H <sub>3</sub> Zol) <sub>2</sub> (H <sub>2</sub> O)]·2H <sub>2</sub> O                                                                                                     | $C2/c$     | 0D | ✓ | ✗ | D.-K. Cao <i>et al.</i> , <i>Dalton Trans.</i> , <b>0</b> (2008) 5008-5015         |
| 16. | IMUTUH | [Cu(2,2'-bpy)(H <sub>3</sub> Zol)(HSO <sub>4</sub> )]                                                                                                                          | $P\bar{1}$ | 0D | ✓ | ✗ | Q.-J. Niu <i>et al.</i> , <i>J. Coord. Chem.</i> , <b>69</b> (2016) 1447-1462      |
| 17. | IMUVAP | [Cu <sub>2</sub> (2,2'-bpy) <sub>2</sub> (HZol)(H <sub>2</sub> O)(Cl)]·4H <sub>2</sub> O                                                                                       | $P\bar{1}$ | 0D | ✓ | ✗ | Q.-J. Niu <i>et al.</i> , <i>J. Coord. Chem.</i> , <b>69</b> (2016) 1447-1462      |
| 18. | IMUVET | [Cu <sub>2</sub> (phen) <sub>2</sub> (HZol)(H <sub>2</sub> O)(Cl)]·2.5H <sub>2</sub> O                                                                                         | $C2/c$     | 0D | ✓ | ✗ | Q.-J. Niu <i>et al.</i> , <i>J. Coord. Chem.</i> , <b>69</b> (2016) 1447-1462      |
| 19. | IMUVIX | [Cu <sub>3</sub> (2,2'-bpy) <sub>3</sub> (H <sub>3</sub> Zol)(HZol)(SO <sub>4</sub> )]·5H <sub>2</sub> O                                                                       | $P\bar{1}$ | 0D | ✓ | ✗ | Q.-J. Niu <i>et al.</i> , <i>J. Coord. Chem.</i> , <b>69</b> (2016) 1447-1462      |
| 20. | POXCOW | Na <sub>2</sub> [Re(CO) <sub>3</sub> (2,2'-bpy)(H <sub>3</sub> Zol)]Cl <sub>3</sub> ·8H <sub>2</sub> O                                                                         | $P\bar{1}$ | 0D | ✓ | ✗ | A. Yazdani <i>et al.</i> , <i>Inorg. Chem.</i> , <b>54</b> (2015) 1728-1736        |
| 21. | FELZAZ | Fe <sub>15</sub> (HZol) <sub>10</sub> (H <sub>2</sub> Zol) <sub>2</sub> (H <sub>2</sub> O) <sub>24</sub><br>(2/3Cl:1/3H <sub>2</sub> O) <sub>6</sub> ·7Cl·65(H <sub>2</sub> O) | $P\bar{1}$ | 0D | ✓ | ✗ | E. Freire <i>et al.</i> , <i>Inorganica Chim. Acta</i> , <b>394</b> (2013) 229-236 |
| 22. | TAMMEB | [Ca(H <sub>2</sub> Zol)(H <sub>2</sub> O)]                                                                                                                                     | $Pna2_1$   | 1D | ✓ | ✗ | D. Liu <i>et al.</i> , <i>Chem. Commun.</i> , <b>48</b> (2012) 2668-2670           |
| 23. | GOZPUI | [Cu <sub>3</sub> (HZol) <sub>2</sub> (H <sub>2</sub> O) <sub>6</sub> ]·6H <sub>2</sub> O                                                                                       | $P\bar{1}$ | 1D | ✓ | ✗ | L. Qiu <i>et al.</i> , <i>Eur. J. Med. Chem.</i> , <b>89</b> (2015) 42-50          |
| 24. | OXAMUW | [Mn(H <sub>2</sub> Zol)]·H <sub>2</sub> O                                                                                                                                      | $P2_1/c$   | 1D | ✓ | ✗ | D.-K. Cao <i>et al.</i> , <i>Inorg. Chem.</i> , <b>50</b> (2011) 2278-2287         |



|                            |          |                                                                                                             |            |                  |   |   |                                                                                   |
|----------------------------|----------|-------------------------------------------------------------------------------------------------------------|------------|------------------|---|---|-----------------------------------------------------------------------------------|
| 25.                        | VIRXAX   | (H <sub>2</sub> ppz)[Zn <sub>2</sub> (HZol) <sub>2</sub> (ox)]                                              | $P\bar{1}$ | 1D               | ✓ | ✗ | X.-L. Zhang <i>et al.</i> , <i>Dalton Trans.</i> , <b>43</b> (2014) 285-289       |
| 26.                        | VIMXIZ   | [Ni <sub>3</sub> (HZol) <sub>2</sub> (H <sub>2</sub> O) <sub>4</sub> ] $\cdot$ 2H <sub>2</sub> O            | $P\bar{1}$ | 2D               | ✓ | ✗ | D.-K. Cao <i>et al.</i> , <i>Inorg. Chem.</i> , <b>46</b> (2007) 7571-7578        |
| 27.                        | VIMXEV   | [Co <sub>3</sub> (HZol) <sub>2</sub> (H <sub>2</sub> O) <sub>4</sub> ] $\cdot$ 2H <sub>2</sub> O            | $P\bar{1}$ | 2D               | ✓ | ✗ | D.-K. Cao <i>et al.</i> , <i>Inorg. Chem.</i> , <b>46</b> (2007) 7571-7578        |
| 28.                        | VIRXEB   | [Zn <sub>3</sub> (HZol) <sub>2</sub> (H <sub>2</sub> O) <sub>4</sub> ]                                      | $C2/c$     | 2D               | ✓ | ✗ | X.-L. Zhang <i>et al.</i> , <i>Dalton Trans.</i> , <b>43</b> (2014) 285-289       |
| 29.                        | OXAMOQ   | [Co <sub>3</sub> (HZol) <sub>2</sub> (H <sub>2</sub> O) <sub>4</sub> ]                                      | $C2/c$     | 2D               | ✓ | ✗ | D.-K. Cao <i>et al.</i> , <i>Inorg. Chem.</i> , <b>50</b> (2011) 2278-2287        |
| 30.                        | DOGYUU01 | [Cu <sub>3</sub> (HZol) <sub>2</sub> (H <sub>2</sub> O) <sub>2</sub> ]                                      | $P\bar{1}$ | 2D               | ✓ | ✗ | Y. Li, <i>Acta Cryst.</i> , <b>E66</b> (2010) m1576                               |
| 31.                        | KUJGON   | (H <sub>2</sub> en)[Co <sub>3</sub> (H <sub>2</sub> Zol) <sub>2</sub> (ox)(H <sub>2</sub> O) <sub>2</sub> ] | $P\bar{1}$ | 2D               | ✓ | ✗ | Q.-J. Niu <i>et al.</i> , <i>J. Solid State Chem.</i> , <b>227</b> (2015) 212-218 |
| 32.                        | OXAMIK   | [Co <sub>3</sub> (HZol) <sub>2</sub> (H <sub>2</sub> O) <sub>4</sub> ] $\cdot$ 2H <sub>2</sub> O            | $P\bar{1}$ | 3D               | ✓ | ✗ | D.-K. Cao <i>et al.</i> , <i>Inorg. Chem.</i> , <b>50</b> (2011) 2278-2287        |
| 33.                        | AKUKUO   | [Ni <sub>3</sub> (HZol) <sub>2</sub> (bpe) <sub>2</sub> ] $\cdot$ 4H <sub>2</sub> O                         | $P\bar{1}$ | 3D               | ✓ | ✗ | Q.-J. Niu <i>et al.</i> , <i>Transit. Met. Chem.</i> , <b>41</b> (2016) 365-373   |
| 34.                        | SUSMIE   | [Ni <sub>3</sub> (HZol) <sub>2</sub> (4,4'-bpy)] $\cdot$ (4,4'-bpy) $\cdot$ 4H <sub>2</sub> O               | $P\bar{1}$ | 3D               | ✓ | ✗ | X.-Q. Wu <i>et al.</i> , <i>Inorg. Chem. Commun.</i> , <b>58</b> (2015) 60-63     |
| 35.                        | VIRXIF   | (H <sub>2</sub> ppz)[Zn <sub>3</sub> (Zol) <sub>2</sub> ]                                                   | $P3_221$   | 3D               | ✓ | ✗ | X.-L. Zhang <i>et al.</i> , <i>Dalton Trans.</i> , <b>43</b> (2014) 285-289       |
| 36.                        | KUJGUT   | [Cd <sub>4</sub> (HZol) <sub>2</sub> (ox)(H <sub>2</sub> O) <sub>2</sub> ]                                  | $C2/c$     | 3D               | ✓ | ✗ | Q.-J. Niu <i>et al.</i> , <i>J. Solid State Chem.</i> , <b>227</b> (2015) 212-218 |
| <b>5. H<sub>4</sub>Ris</b> |          |                                                                                                             |            |                  |   |   |                                                                                   |
| 1.                         | WURPOO   | Na(H <sub>3</sub> Ris) $\cdot$ 2H <sub>2</sub> O                                                            | $P\bar{1}$ | org.-inorg. salt | ✓ | ✗ | W. L. Gossman <i>et al.</i> , <i>Acta Cryst.</i> , <b>C59</b> (2003) m33-m36      |
| 2.                         | WURPUU   | Na(H <sub>3</sub> Ris) $\cdot$ 2.5H <sub>2</sub> O                                                          | $C2/c$     | org.-inorg. salt | ✓ | ✗ | W. L. Gossman <i>et al.</i> , <i>Acta Cryst.</i> , <b>C59</b> (2003) m33-m36      |
| 3.                         | ORUWII   | 3[Na(H <sub>3</sub> Ris)] $\cdot$ 3AcOH                                                                     | $P2_1/n$   | org.-inorg. salt | ✓ | ✗ | J. Bruning <i>et al.</i> , <i>J. Pharm. Sci.</i> , <b>100</b> (2011) 863-873      |

|     |        |                                                                                          |              |                  |   |   |                                                                                             |
|-----|--------|------------------------------------------------------------------------------------------|--------------|------------------|---|---|---------------------------------------------------------------------------------------------|
| 4.  | YEFTOT | $\text{K}(\text{H}_3\text{Ris})\cdot 2\text{H}_2\text{O}$                                | $P2_1/n$     | org.-inorg. salt | ✓ | ✗ | K. Stahl <i>et al.</i> , <i>Acta Cryst.</i> , <b>C62</b> (2006) m112-m115                   |
| 5.  | YEFTIN | $(\text{NH}_4)(\text{H}_3\text{Ris})\cdot 2\text{H}_2\text{O}$                           | $P2_1/n$     | org.-inorg. salt | ✓ | ✗ | K. Stahl <i>et al.</i> , <i>Acta Cryst.</i> , <b>C62</b> (2006) m112-m115                   |
| 6.  | LUVMUL | $[\text{Cu}(\text{H}_3\text{Ris})_2]\cdot 4\text{H}_2\text{O}$                           | $P\bar{1}$   | 0D               | ✓ | ✗ | S. Kunnas-Hiltunen <i>et al.</i> , <i>Z. Anorg. Allg. Chem.</i> , <b>636</b> (2010) 710-720 |
| 7.  | LAKPOE | $[\text{Ni}(\text{H}_3\text{Ris})_2(\text{H}_2\text{O})_2]\cdot 2\text{H}_2\text{O}$     | $P\bar{1}$   | 0D               | ✓ | ✗ | B. Demoro <i>et al.</i> , <i>J. Inorg. Biochem.</i> , <b>104</b> (2010) 1252-1258           |
| 8.  | DUPXOC | $[\text{Zn}(\text{H}_2\text{Ris})]$                                                      | $P2_1/n$     | 1D               | ✓ | ✗ | X. Huang <i>et al.</i> , <i>Acta Cryst.</i> , <b>E66</b> (2010) m59-m60                     |
| 9.  | POLNEK | $[\text{Cd}(\text{H}_2\text{Ris})(\text{H}_2\text{O})]$                                  | $P2_12_12_1$ | 1D               | ✓ | ✗ | J. Hu <i>et al.</i> , <i>Inorg. Chem. Commun.</i> , <b>11</b> (2008) 1110-1112              |
| 10. | GAPSIC | $[\text{Cd}(\text{H}_2\text{Ris})]\cdot \text{H}_2\text{O}$                              | $P2_1/c$     | 1D               | ✓ | ✗ | K.-R. Ma <i>et al.</i> , <i>J. Mol. Struct.</i> , <b>1139</b> (2017) 67-77                  |
| 11. | HIRJUP | $[\text{Fe}(\text{H}_2\text{Ris})(\text{H}_2\text{O})]$                                  | $P2_1/n$     | 1D               | ✓ | ✗ | K.-R. Ma <i>et al.</i> , <i>Synth. Met.</i> , <b>182</b> (2013) 40-48                       |
| 12. | MINKEA | $[\text{Co}(\text{H}_2\text{Ris})(\text{H}_2\text{O})]$                                  | $P2_1/n$     | 1D               | ✓ | ✗ | Z.-C. Zhang <i>et al.</i> , <i>Dalton Trans.</i> , <b>0</b> (2007) 4681-4684                |
| 13. | PUNZII | $[\text{Mn}(\text{H}_2\text{Ris})(\text{H}_2\text{O})]$                                  | $P2_1/n$     | 1D               | ✓ | ✗ | J. Zhao <i>et al.</i> , <i>Inorg. Chim. Acta</i> , <b>363</b> (2010) 662-668                |
| 14. | YUDPAP | $[\text{Mn}(\text{H}_2\text{Ris})]\cdot 3\text{H}_2\text{O}$                             | $P\bar{1}$   | 1D               | ✓ | ✗ | Y. Ma <i>et al.</i> , <i>Inorg. Chem. Commun.</i> , <b>12</b> (2009) 860-863                |
| 15. | GAPSUO | $[\text{Cu}_3(\text{H}_3\text{Ris})_4]\cdot 2(\text{OH})\cdot 2\text{H}_2\text{O}$       | $P\bar{1}$   | 1D               | ✓ | ✗ | K.-R. Ma <i>et al.</i> , <i>J. Mol. Struct.</i> , <b>1139</b> (2017) 67-77                  |
| 16. | RUFFAB | $(\text{Hdma})[\text{Zn}_2(\text{H}_2\text{Ris})(\text{HRis})]\cdot 3\text{H}_2\text{O}$ | $P2_1/c$     | 1D               | ✓ | ✗ | T. Sun <i>et al.</i> , <i>RSC Adv.</i> , <b>5</b> (2015) 26410-26419                        |
| 17. | HIRJOJ | $[\text{Mg}_3(\text{HRis})_2(\text{H}_2\text{O})_4]\cdot 2\text{H}_2\text{O}$            | $P\bar{1}$   | 2D               | ✓ | ✗ | K.-R. Ma <i>et al.</i> , <i>Synth. Met.</i> , <b>182</b> (2013) 40-48                       |
| 18. | GAPSOI | $[\text{Cu}_3(\text{HRis})_2(\text{H}_2\text{O})_2]$                                     | $P2_1/c$     | 2D               | ✓ | ✗ | K.-R. Ma <i>et al.</i> , <i>J. Mol. Struct.</i> , <b>1139</b> (2017) 67-77                  |
| 19. | HIYBAU | $[\text{Ni}_3(\text{HRis})_2(\text{H}_2\text{O})_4]\cdot \text{H}_2\text{O}$             | $P\bar{1}$   | 2D               | ✗ | ✓ | Z.-F. Guo <i>et al.</i> , <i>Transit. Met. Chem.</i> , <b>39</b> (2014) 353-360             |

|                               |        |                                                                                                                     |            |    |   |   |                                                                                 |
|-------------------------------|--------|---------------------------------------------------------------------------------------------------------------------|------------|----|---|---|---------------------------------------------------------------------------------|
| 20.                           | PUNZEE | [Ni <sub>3</sub> (HRis) <sub>2</sub> (H <sub>2</sub> O) <sub>4</sub> ] $\cdot$ 2H <sub>2</sub> O                    | $P\bar{1}$ | 2D | ✓ | ✗ | J. Zhao <i>et al.</i> , <i>Inorg. Chim. Acta</i> , <b>363</b> (2010) 662-668    |
| 21.                           | HIRKAW | [Ni <sub>3</sub> (HRis) <sub>2</sub> (H <sub>2</sub> O) <sub>4</sub> ] $\cdot$ 3H <sub>2</sub> O                    | $P\bar{1}$ | 2D | ✗ | ✓ | K.-R. Ma <i>et al.</i> , <i>Synth. Met.</i> , <b>182</b> (2013) 40-48           |
| 22.                           | POLNIO | [Cd <sub>2</sub> (HRis)(H <sub>2</sub> O)(Cl)]                                                                      | $P2_1/c$   | 2D | ✓ | ✗ | J. Hu <i>et al.</i> , <i>Inorg. Chem. Commun.</i> , <b>11</b> (2008) 1110-1112  |
| 23.                           | HIXZUL | [Cu <sup>I</sup> Cu <sup>II</sup> (HRis)] $\cdot$ (H <sub>2</sub> O) $\cdot$ 0.5(en)                                | $P\bar{1}$ | 2D | ✓ | ✗ | Z.-F. Guo <i>et al.</i> , <i>Transit. Met. Chem.</i> , <b>39</b> (2014) 353-360 |
| 24.                           | VEGWOV | [Fe <sub>3</sub> (H <sub>2</sub> Ris) <sub>2</sub> (H <sub>2</sub> O) <sub>2</sub> (ox)]                            | $P\bar{1}$ | 2D | ✓ | ✗ | C. Li <i>et al.</i> , <i>CrystEngComm</i> , <b>14</b> (2012) 5479-5486          |
| 25.                           | VEGWUB | [Co <sub>3</sub> (H <sub>2</sub> Ris) <sub>2</sub> (H <sub>2</sub> O) <sub>2</sub> (ox)]                            | $P\bar{1}$ | 2D | ✓ | ✗ | C. Li <i>et al.</i> , <i>CrystEngComm</i> , <b>14</b> (2012) 5479-5486          |
| 26.                           | VEGXAI | [Zn <sub>3</sub> (H <sub>2</sub> Ris) <sub>2</sub> (H <sub>2</sub> O) <sub>2</sub> (ox)]                            | $P\bar{1}$ | 2D | ✓ | ✗ | C. Li <i>et al.</i> , <i>CrystEngComm</i> , <b>14</b> (2012) 5479-5486          |
| 27.                           | VEGXEM | [Cu <sub>3</sub> (H <sub>2</sub> Ris) <sub>2</sub> (ox)]                                                            | $P\bar{1}$ | 2D | ✓ | ✗ | C. Li <i>et al.</i> , <i>CrystEngComm</i> , <b>14</b> (2012) 5479-5486          |
| 28.                           | TAPJUR | [Zn <sub>2</sub> (Ris)(H <sub>2</sub> O)]                                                                           | $P2_1/n$   | 3D | ✓ | ✗ | R. Fu <i>et al.</i> , <i>CrystEngComm</i> , <b>13</b> (2011) 2331-2335          |
| 29.                           | TAPKAY | [Cu <sub>4</sub> (Ris) <sub>2</sub> (H <sub>2</sub> O) <sub>4</sub> ] $\cdot$ 1.25H <sub>2</sub> O                  | $P\bar{1}$ | 3D | ✓ | ✗ | R. Fu <i>et al.</i> , <i>CrystEngComm</i> , <b>13</b> (2011) 2331-2335          |
| 30.                           | TIGSOT | (H <sub>2</sub> dmtppz) <sub>0.5</sub> [Zn <sub>3</sub> (Ris)(HRis)] $\cdot$ 3H <sub>2</sub> O                      | $P2_1/c$   | 3D | ✓ | ✗ | R. Fu <i>et al.</i> , <i>CrystEngComm</i> , <b>13</b> (2011) 6334-6336          |
| 31.                           | RUFDUT | (Hdma) <sub>2</sub> [Ni <sub>3</sub> (Ris) <sub>2</sub> (H <sub>2</sub> O) <sub>2</sub> ] $\cdot$ 2H <sub>2</sub> O | $Pbca$     | 3D | ✓ | ✗ | T. Sun <i>et al.</i> , <i>RSC Adv.</i> , <b>5</b> (2015) 26410-26419            |
| 32.                           | LICKAL | (H <sub>2</sub> ampy) <sub>0.5</sub> [Zn <sub>3</sub> (Ris)(HRis)] $\cdot$ 3H <sub>2</sub> O                        | $P2_1/c$   | 3D | ✓ | ✗ | R. Fu <i>et al.</i> , <i>CrystEngComm</i> , <b>13</b> (2011) 6334-6336          |
| <b>6. H<sub>4</sub>Py-Ris</b> |        |                                                                                                                     |            |    |   |   |                                                                                 |
| 1.                            | OGATIB | [Cu(H <sub>3</sub> 4py-Ris) <sub>2</sub> ]                                                                          | $P2_1/c$   | 0D | ✓ | ✗ | Y.-S. Ma <i>et al.</i> , <i>RSC Adv.</i> , <b>3</b> (2013) 18430-18440          |
| 2.                            | ODEPAR | [Zn(H <sub>2</sub> 4py-Ris)] $\cdot$ H <sub>2</sub> O                                                               | $P2_1/c$   | 1D | ✓ | ✗ | W.-Y. Yin <i>et al.</i> , <i>J. Mol. Eng. Mater.</i> , <b>2</b> (2014) 1440003  |

|                            |                     |                                                                                                                |                                    |    |   |   |                                                                                |
|----------------------------|---------------------|----------------------------------------------------------------------------------------------------------------|------------------------------------|----|---|---|--------------------------------------------------------------------------------|
| 3.                         | ODEPEV              | [Cd(H <sub>2</sub> 4py-Ris)]·H <sub>2</sub> O                                                                  | <i>P</i> 2 <sub>1</sub> / <i>c</i> | 1D | ✓ | ✗ | W.-Y. Yin <i>et al.</i> , <i>J. Mol. Eng. Mater.</i> , <b>2</b> (2014) 1440003 |
| 4.                         | OGASOG              | [Mn(H <sub>2</sub> 4py-Ris)]·H <sub>2</sub> O                                                                  | <i>P</i> 2 <sub>1</sub> / <i>c</i> | 1D | ✓ | ✗ | Y.-S. Ma <i>et al.</i> , <i>RSC Adv.</i> , <b>3</b> (2013) 18430-18440         |
| 5.                         | OGATUN              | [Co(H <sub>2</sub> 4py-Ris)]·H <sub>2</sub> O                                                                  | <i>P</i> 2 <sub>1</sub> / <i>c</i> | 1D | ✓ | ✗ | Y.-S. Ma <i>et al.</i> , <i>RSC Adv.</i> , <b>3</b> (2013) 18430-18440         |
| 6.                         | OGATAT              | [Cu(H <sub>2</sub> 4py-Ris)]                                                                                   | <i>P</i> 1̄                        | 1D | ✓ | ✗ | Y.-S. Ma <i>et al.</i> , <i>RSC Adv.</i> , <b>3</b> (2013) 18430-18440         |
| 7.                         | OGATOH              | [Co <sub>2</sub> (H <sub>3</sub> 4py-Ris) <sub>2</sub> (ox)(H <sub>2</sub> O) <sub>2</sub> ]·2H <sub>2</sub> O | <i>P</i> 1̄                        | 1D | ✓ | ✗ | Y.-S. Ma <i>et al.</i> , <i>RSC Adv.</i> , <b>3</b> (2013) 18430-18440         |
| 8.                         | OGASUM              | [Cu <sup>I</sup> Cu <sup>II</sup> <sub>3</sub> (H <sub>0.5</sub> 4-pyRis) <sub>2</sub> ]                       | <i>P</i> 1̄                        | 2D | ✓ | ✗ | Y.-S. Ma <i>et al.</i> , <i>RSC Adv.</i> , <b>3</b> (2013) 18430-18440         |
| 9.                         | OGATEX              | [Cu <sub>3</sub> (H <sub>2</sub> 4py-Ris) <sub>2</sub> (ox)]                                                   | <i>P</i> 1̄                        | 2D | ✓ | ✗ | Y.-S. Ma <i>et al.</i> , <i>RSC Adv.</i> , <b>3</b> (2013) 18430-18440         |
| 10.                        | OGAVAV              | [Co <sub>3</sub> (H <sub>4</sub> py-Ris) <sub>2</sub> (ox)(H <sub>2</sub> O) <sub>2</sub> ]                    | <i>P</i> 1̄                        | 2D | ✓ | ✗ | Y.-S. Ma <i>et al.</i> , <i>RSC Adv.</i> , <b>3</b> (2013) 18430-18440         |
| <b>7. H<sub>4</sub>Min</b> |                     |                                                                                                                |                                    |    |   |   |                                                                                |
| 1.                         | ESAVAX <sup>d</sup> | [Zn(H <sub>3</sub> Min) <sub>2</sub> (H <sub>2</sub> O) <sub>2</sub> ]·3H <sub>2</sub> O                       | <i>C</i> 2/ <i>c</i>               | 0D | ✗ | ✗ | R. Fu <i>et al.</i> , <i>Cryst. Growth Des.</i> , <b>16</b> (2016) 5074–5083   |
| 2.                         | ESAVEB              | [Zn(H <sub>2</sub> Min)(H <sub>2</sub> O) <sub>2</sub> ]·H <sub>2</sub> O                                      | <i>P</i> 2 <sub>1</sub> / <i>c</i> | 0D | ✓ | ✗ | R. Fu <i>et al.</i> , <i>Cryst. Growth Des.</i> , <b>16</b> (2016) 5074–5083   |
| 3.                         | ESATUP              | [Zn(H <sub>2</sub> Min)]                                                                                       | <i>Pca</i> 2 <sub>1</sub>          | 2D | ✓ | ✗ | R. Fu <i>et al.</i> , <i>Cryst. Growth Des.</i> , <b>16</b> (2016) 5074–5083   |
| <b>8. H<sub>4</sub>Tra</b> |                     |                                                                                                                |                                    |    |   |   |                                                                                |
| 1.                         | POVRIC              | [Co(H <sub>2</sub> Tra)]                                                                                       | <i>P</i> 1̄                        | 2D | ✓ | ✗ | D.-G. Ding <i>et al.</i> , <i>Cryst. Growth Des.</i> , <b>9</b> (2009) 508-516 |
| 2.                         | POVROI <sup>e</sup> | [Ni <sub>2</sub> (H <sub>2</sub> Tra) <sub>2</sub> ](en)                                                       | <i>P</i> 2 <sub>1</sub> / <i>c</i> | 2D | ✗ | ✗ | D.-G. Ding <i>et al.</i> , <i>Cryst. Growth Des.</i> , <b>9</b> (2009) 508-516 |
| 3.                         | POVRAU              | [Mn <sub>2</sub> (Tra)(H <sub>2</sub> O) <sub>2</sub> ]                                                        | <i>P</i> 2 <sub>1</sub> / <i>c</i> | 3D | ✓ | ✗ | D.-G. Ding <i>et al.</i> , <i>Cryst. Growth Des.</i> , <b>9</b> (2009) 508-516 |
| 4.                         | POVREY              | [Cu <sub>2</sub> (Tra)(H <sub>2</sub> O)]                                                                      | <i>P</i> 1̄                        | 3D | ✓ | ✗ | D.-G. Ding <i>et al.</i> , <i>Cryst. Growth Des.</i> , <b>9</b> (2009) 508-516 |

## 9. H<sub>4</sub>Olp

no crystal structure based on H<sub>4</sub>Olp was found in CSD

## 10. H<sub>4</sub>Prp

no crystal structure based on H<sub>4</sub>Prp was found in CSD

## 11. H<sub>4</sub>Ppp

no crystal structure based on H<sub>4</sub>Ppp was found in CSD

<sup>a</sup>Abbreviations: H<sub>4</sub>Pam – pamidronic acid, H<sub>4</sub>Ale – alendronic acid, H<sub>4</sub>Ner – neridronic acid, H<sub>4</sub>Zol – zoledronic acid, H<sub>4</sub>Ris – risedronic acid, H<sub>4</sub>4Py-Ris – 1-hydroxy-2-(4-pyridyl)ethylidene-1,1-diphosphonic acid, H<sub>4</sub>Min – minodronic acid, H<sub>4</sub>Tra – 1-hydroxy-2-(1*H*-1,2,4-triazol-1-yl)ethylidene-1,1-diphosphonic acid, H<sub>4</sub>Olp – olpadronic acid, H<sub>4</sub>Prp – 1-hydroxy-3-(1-pyrrolidinyl)propylidene-1,1-diphosphonic acid, H<sub>4</sub>Ppp – 1-hydroxy-3-(1-piperidinyl)propylidene-1,1-diphosphonic acid, ade – adenine, cyt – cytosine, gua – guanidine, 2,2'-bpy – 2,2'-bipyridine, 4,4'-bpy – 4,4'-bipyridine, bpe – trans-4,4'-vinylenedipyridine, phen – 1,10-phenanthroline, ampy – 4-(aminomethyl)pyridine, ppz – piperazine, dmtppz – 2,5-dimethylpiperazine, dma – dimethylamine, dcha – dicyclohexylamine, tba – tetrabutylammonium, en – ethylenediamine, meen – *N*-methylethylenediamine, me<sub>2</sub>en – *N,N'*-dimethylethylenediamine, et<sub>2</sub>en – *N,N'*-diethylethylenediamine, oda – 1,8-octanediamine, chda – cyclohexyl-1,2-diamine, xda – 1,3-benzenedimethanamine, phea – phenethylamine, mel – melamine, AcOH – acetic acid, H<sub>2</sub>ox – oxalic acid, EtOH – ethanol. <sup>b</sup>Conformation state was determined for the  $\tau_1(\text{R}-\text{C}_\alpha-\text{C}-\text{O})$  dihedral angle describing the position of hydroxyl O atom with respect to the R<sup>1</sup> group: I – synclinal (*sc*), II – antiperiplanar (*ap*). <sup>c</sup>One of crystallographically nonequivalent ligands in synperiplanar (*sp*) conformation. <sup>d</sup>Ligand moiety in synperiplanar (*sp*) conformation. <sup>e</sup>Ligand moiety in anticlinal (*ac*) conformation.

**Table S2.** Values of  $\tau_1(\text{R}-\text{C}_\alpha-\text{C}-\text{O})$  dihedral angle in bisphosphonate ligands.

| <i>Lp.</i>                 | <i>Database refcode</i> | $\pm\tau_1$ [°] |
|----------------------------|-------------------------|-----------------|----------------------------|-------------------------|-----------------|----------------------------|-------------------------|-----------------|----------------------------|-------------------------|-----------------|
| <b>Ligands</b>             |                         |                 | 11.                        | XEHTEK                  | 52.57           | 13.                        | PUQGUF                  | 63.75           | 3.                         | ICUVAE cd               | 50.50           |
| 1.                         | SOPSEV                  | 66.54           | 12.                        | BACMUP                  | 6.64            | 14.                        | PUQJAO                  | 64.40           | 4.                         | ICUVEI                  | 64.20           |
|                            | GOWZEX                  | 54.96           |                            |                         | 69.22           |                            |                         | 66.05           |                            |                         | 46.14           |
| 2.                         | KOJGUL                  | 69.86           | 13.                        | XEHTUA                  | 179.17          | 15.                        | PUQHUG                  | 66.35           | 5.                         | ICUVIM                  | 65.58           |
|                            |                         | 65.99           | 14.                        | XEHTIO                  | 67.19           |                            |                         | 59.91           |                            |                         | 168.22          |
| 3.                         | VUYTUE                  | 52.26           | 15.                        | XOTRIJ                  | 180.00          | 16.                        | VEFBEQ                  | 53.54           | <b>4. H<sub>4</sub>Zol</b> |                         |                 |
| 4.                         | MEYGII                  | 72.57           | 16.                        | XOTROP                  | 180.00          | 17.                        | VEFBIU                  | 65.30           | 1.                         | KUQYIF                  | 51.34           |
|                            | BEKBOJ                  | 58.70           | 17.                        | XOTRUV                  | 180.00          | 18.                        | VEFBOA                  | 64.45           |                            |                         | 75.53           |
|                            |                         | 51.69           | 18.                        | XOTSAC                  | 178.90          | 19.                        | VEFBUG                  | 60.01           | 2.                         | DULFOG                  | 55.28           |
|                            | ORUZEH                  | 61.58           | <b>2. H<sub>4</sub>Ale</b> |                         |                 | 20.                        | VEFCAN                  | 61.09           | 3.                         | JAPJOC                  | 60.37           |
| 5.                         | MOFVOS                  | 59.31           | 1.                         | EJEZUP                  | 177.89          |                            | 62.19                   |                 | 4.                         | ENODIV                  | 62.86           |
| 6.                         | UPAVUD                  | 61.71           | 2.                         | TEHWOS                  | 59.34           | 21.                        | VEFCER                  | 69.89           | 5.                         | SIXZUW                  | 53.93           |
| 7.                         | BIZWAI02                | 50.26           | 3.                         | PUQHAM                  | 67.87           | 22.                        | VEFCIV                  | 52.20           | 6.                         | SIYBAF                  | 51.96           |
| 8.                         | WETQES                  | 65.54           | 4.                         | PUQFOY                  | 64.38           | 23.                        | VEFCOB                  | 51.97           | 7.                         | YAGXEL                  | 57.83           |
| 9.                         | FURCAW                  | 179.01          |                            |                         | 69.30           |                            |                         | 51.49           | 63.13                      |                         |                 |
| 10.                        | GADPAD                  | 162.10          | 5.                         | PUQHEQ                  | 63.94           | 24.                        | VEFCUH                  | 178.99          | 9.                         | VIMXOF                  | 63.17           |
| 11.                        | EMIGIQ                  | 70.29           |                            |                         | 64.09           | 25.                        | DILTEZ                  | 35.48           | 10.                        | VIMXUL                  | 62.53           |
| <b>1. H<sub>4</sub>Pam</b> |                         |                 | 6.                         | PUQFUE                  | 60.35           | 26.                        | ACQZUP                  | 161.48          | 11.                        | RUPXAC                  | 64.50           |
| 1.                         | FENREW                  | 63.66           |                            | 69.99                   | 49.42           | 27.                        | FAZVOT                  | 163.58          | 12.                        | PUFXUK                  | 62.22           |
| 2.                         | EFAMIH                  | 59.67           | 7.                         | PUQGAL01                | 62.12           |                            |                         | 49.19           | 39.83                      |                         |                 |
| 3.                         | IDAWIV                  | 31.89           | 8.                         | PUQGOZ                  | 68.76           | 28.                        | ICUVOS                  | 161.82          | 13.                        | PUFYAR                  | 39.83           |
| 4.                         | INIYUZ                  | 32.32           |                            |                         | 67.57           |                            |                         | 50.87           | 14.                        | DOGYII                  | 63.30           |
| 5.                         | FAZVUZ                  | 31.70           | 9.                         | PUQGAL                  | 60.23           | 29.                        | GIKPEW                  | 57.82           | 15.                        | DOGYEE                  | 41.32           |
| 6.                         | XEHTOU                  | 35.67           |                            |                         | 69.70           |                            |                         | 30.             | LILQII                     | 45.92                   | 16.             |
|                            |                         | 169.77          | 10.                        | PUQHUI                  | 67.41           | 17.                        | IMUVAP                  |                 |                            | 57.35                   |                 |
| 7.                         | DILTID                  | 67.05           | 11.                        | PUQHOA                  | 68.98           | <b>3. H<sub>4</sub>Ner</b> |                         |                 | 18.                        | IMUVET                  | 52.76           |
| 8.                         | KEVVOX01                | 59.64           |                            |                         | 56.32           | 1.                         | ICUTOQ                  | 58.50           | 19.                        | IMUVIX                  | 64.80           |
| 9.                         | TAMMAX                  | 54.13           | 12.                        | PUQGIT                  | 63.81           | 2.                         | ICUTUW                  | 56.28           | 20.                        | POXCOW                  | 60.19           |
| 10.                        | XEHTAG                  | 51.31           |                            |                         |                 | 3.                         | ICUVAE                  | 31.58           |                            |                         |                 |

| <i>Lp.</i>                 | <i>Database refcode</i> | $\pm\tau_1$ [°] | <i>Lp.</i> | <i>Database refcode</i> | $\pm\tau_1$ [°]             | <i>Lp.</i>                    | <i>Database refcode</i> | $\pm\tau_1$ [°] |
|----------------------------|-------------------------|-----------------|------------|-------------------------|-----------------------------|-------------------------------|-------------------------|-----------------|
| 21.                        | FELZAZ                  | 59.82           | 7.         | LAKPOE                  | 56.78                       | 32.                           | LICKAL cd               | 66.95           |
|                            |                         | 58.79           | 8.         | DUPXOC                  | 53.23                       | <b>6. H<sub>4</sub>Py-Ris</b> |                         |                 |
|                            |                         | 57.01           | 9.         | POLNEK                  | 58.97                       | 1.                            | OGATIB                  | 64.26           |
|                            |                         | 62.78           | 10.        | GAPSIC                  | 69.19                       | 2.                            | ODEPAR                  | 59.06           |
|                            |                         | 55.03           | 11.        | HIRJUP                  | 41.05                       | 3.                            | ODEPEV                  | 59.94           |
|                            |                         | 59.42           | 12.        | MINKEA                  | 42.52                       | 4.                            | OGASOG                  | 60.52           |
| 22.                        | TAMMEB                  | 52.95           | 13.        | PUNZII                  | 40.68                       | 5.                            | OGATUN                  | 61.29           |
| 23.                        | GOZPUI                  | 61.10           | 14.        | YUDPAP                  | 62.06                       | 6.                            | OGATAT                  | 88.47           |
| 24.                        | OXAMUW                  | 50.45           | 15.        | GAPSUO                  | 59.92                       | 7.                            | OGATOH                  | 46.60           |
| 25.                        | VIRXAX                  | 58.83           |            |                         | 49.39                       | 8.                            | OGASUM                  | 40.12           |
| 26.                        | VIMXIZ                  | 55.45           | 16.        | RUFFAB                  | 66.70                       | 9.                            | OGATEX                  | 72.09           |
| 27.                        | VIMXEV                  | 55.12           |            |                         | 60.51                       | 10.                           | OGAVAV                  | 73.19           |
| 28.                        | VIRXEB                  | 42.30           | 17.        | HIRJOJ                  | 62.96                       | <b>7. H<sub>4</sub>Min</b>    |                         |                 |
| 29.                        | OXAMOQ                  | 41.81           | 18.        | GAPSOI                  | 56.03                       | 1.                            | ESAVAX                  | 24.37           |
| 30.                        | DOGYUU01                | 56.47           | 19.        | HIYBAU                  | 176.17                      | 2.                            | ESAVEB                  | 33.90           |
| 31.                        | KUJGON                  | 35.13           | 20.        | PUNZEE                  | 62.86                       | 3.                            | ESATUP                  | 44.15           |
| 32.                        | OXAMIK                  | 57.12           | 21.        | HIRKAW                  | 176.94                      | <b>8. H<sub>4</sub>Tra</b>    |                         |                 |
| 33.                        | AKUKUO                  | 64.95           | 22.        | POLNIO                  | 64.53                       | 1.                            | POVRIC                  | 66.54           |
| 34.                        | SUSMIE                  | 64.14           | 23.        | HIXZUL                  | 57.31                       | 2.                            | POVROI                  | 91.99           |
| 35.                        | VIRXIF                  | 63.31           | 24.        | VEGWOV                  | 66.41                       | 3.                            | POVRAU                  | 38.78           |
| 36.                        | KUJGUT                  | 71.08           | 25.        | VEGWUB                  | 68.09                       | 4.                            | POVREY                  | 41.06           |
| <b>5. H<sub>4</sub>Ris</b> |                         |                 | 26.        | VEGXAI                  | 67.96                       | <b>9. H<sub>4</sub>Olp</b>    |                         |                 |
| 1.                         | WURPOO                  | 53.94           | 27.        | VEGXEM                  | 68.45                       | –                             |                         |                 |
| 2.                         | WURPUU                  | 67.22           | 28.        | TAPJUR                  | 46.88                       | <b>10. H<sub>4</sub>Prp</b>   |                         |                 |
| 3.                         | ORUWII                  | 55.76           | 29.        | TAPKAY                  | 72.41                       | –                             |                         |                 |
|                            |                         | 64.73           |            |                         | <b>11. H<sub>4</sub>PPP</b> |                               |                         |                 |
|                            |                         | 63.00           | 72.75      | –                       |                             |                               |                         |                 |
| 4.                         | YEFTOT                  | 66.88           | 30.        | TIGSOT                  | 69.11                       |                               |                         |                 |
| 5.                         | YEFTIN                  | 58.11           | 31.        | RUFDUT                  | 40.91                       |                               |                         |                 |
| 6.                         | LUVMUL                  | 33.09           | 32.        | LICKAL                  | 75.22                       |                               |                         |                 |

## X-ray powder pattern for 1a

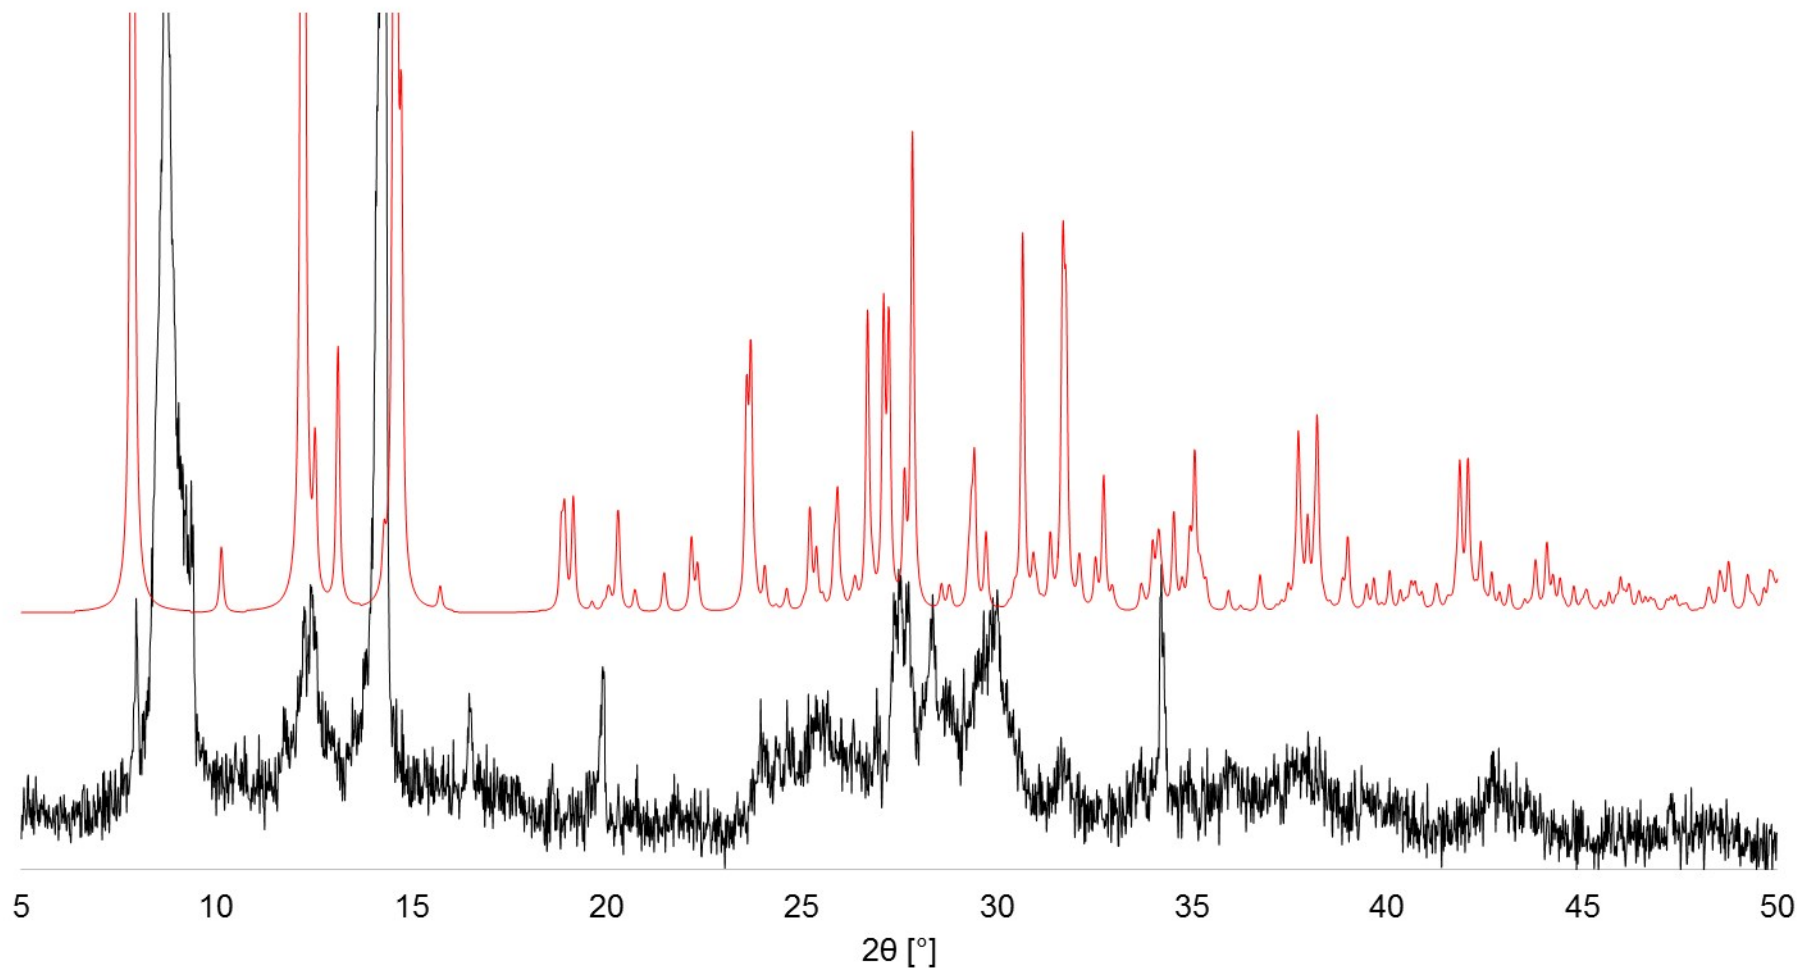

**Figure S1.** Experimental X-ray powder pattern (black,  $T = 298$  K,  $\text{Cu-K}\alpha$ ) and simulated powder pattern (red,  $T = 100$  K,  $\text{Mo-K}\alpha$ ) based on the results from single-crystal X-ray diffraction for the coordination unit **1a**.



## X-ray powder pattern for 3a

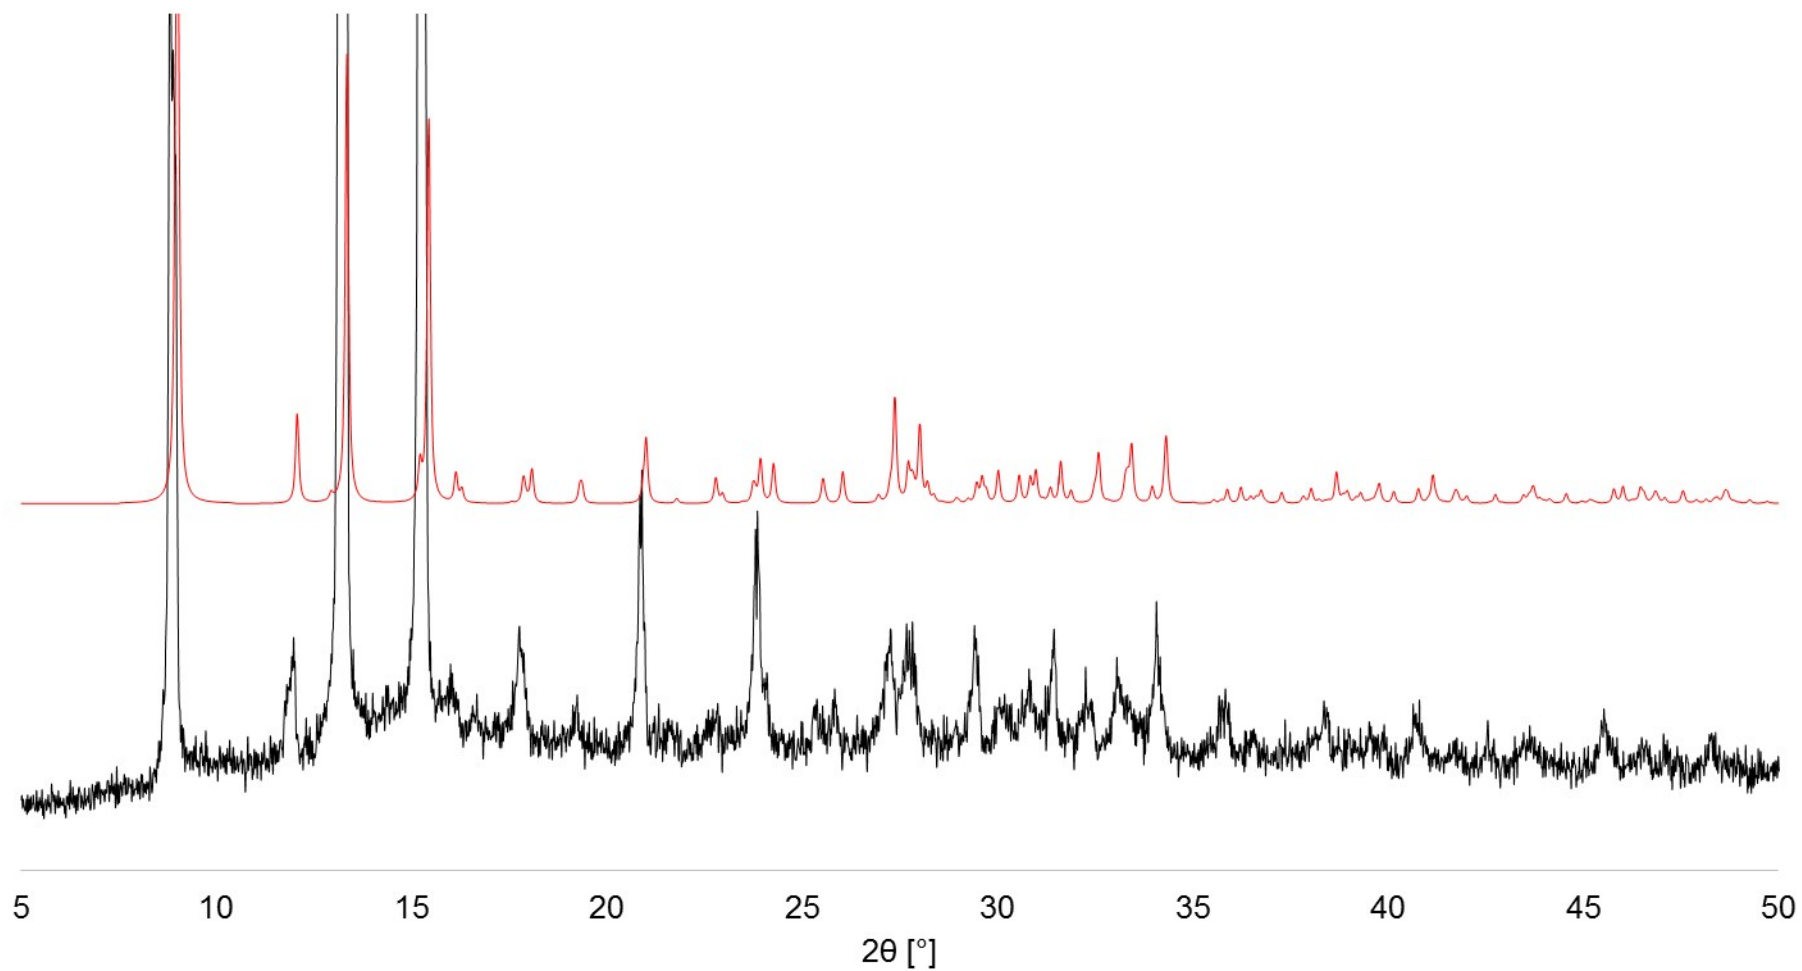

**Figure S2.** Experimental X-ray powder pattern (black,  $T = 298$  K,  $\text{Cu-K}\alpha$ ) and simulated powder pattern (red,  $T = 100$  K,  $\text{Mo-K}\alpha$ ) based on the results from single-crystal X-ray diffraction for the coordination unit **3a**.

## X-ray powder pattern for 4a

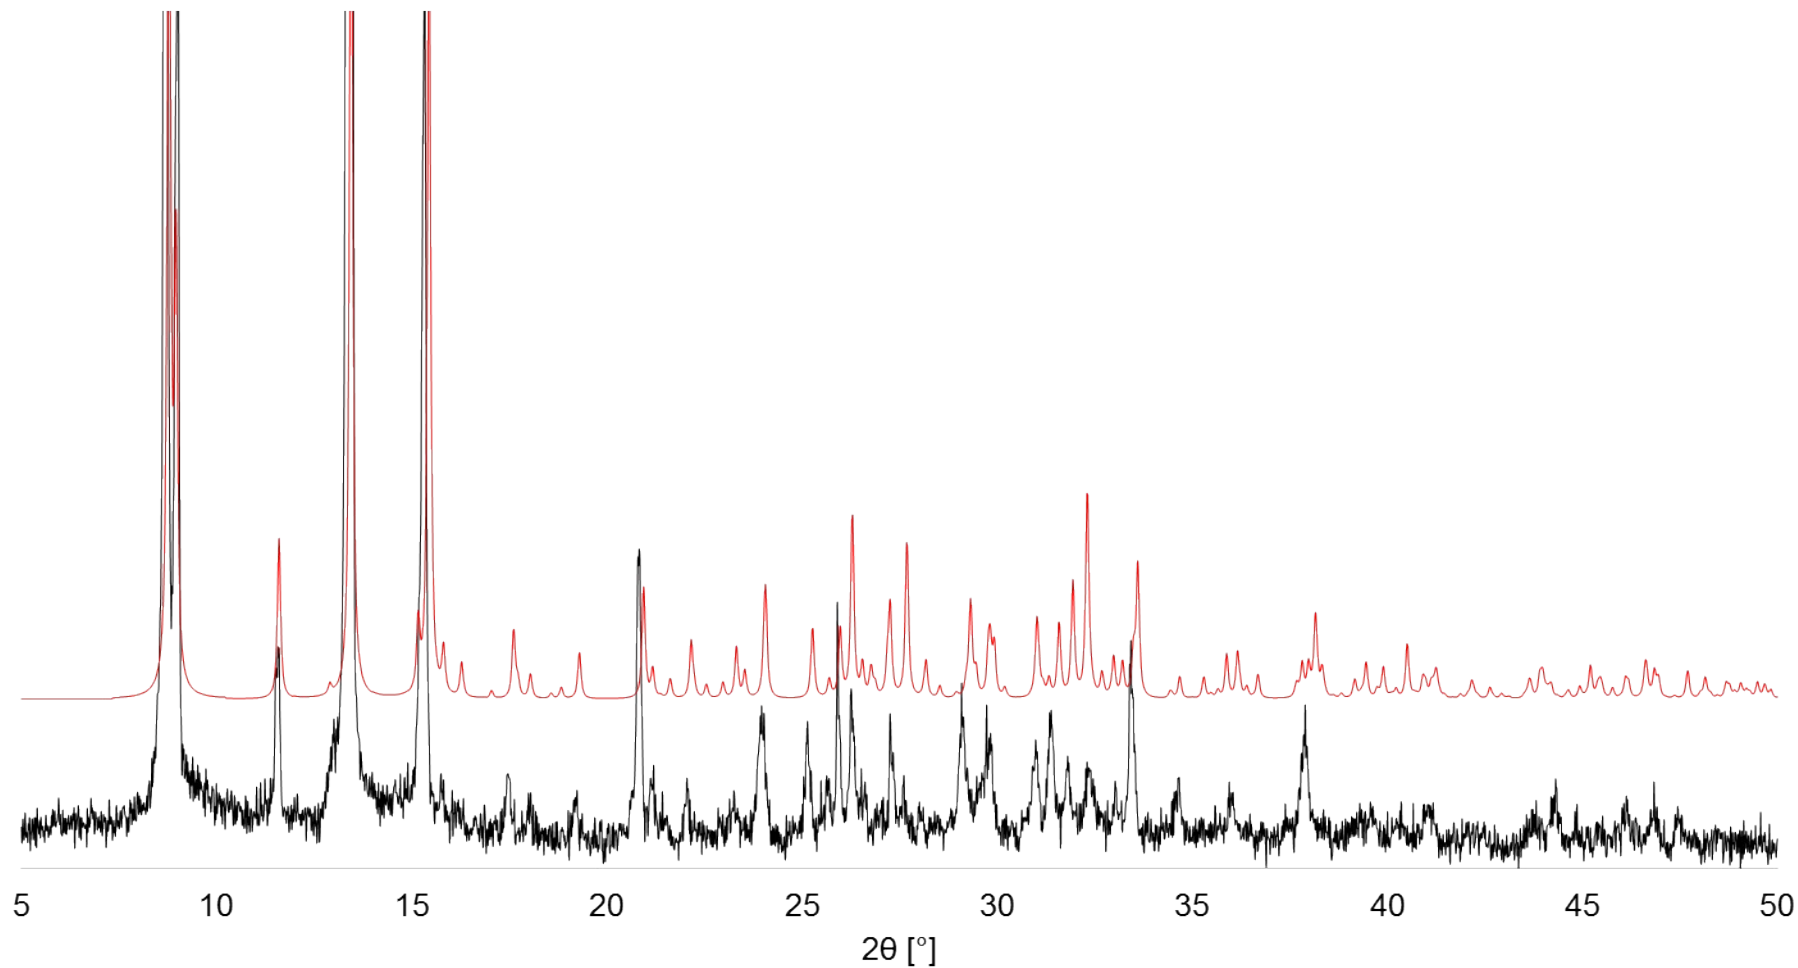

**Figure S3.** Experimental X-ray powder pattern (black,  $T = 298$  K,  $\text{Cu-K}\alpha_1$ ) and simulated powder pattern (red,  $T = 100$  K,  $\text{Mo-K}\alpha$ ) based on the results from single-crystal X-ray diffraction for the coordination unit **4a**.

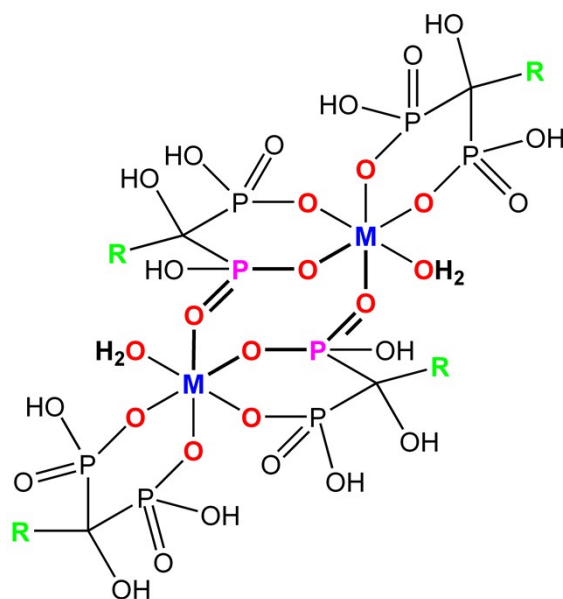

**Scheme S1.** Ligands coordination modes in  $[M_2(H_3L)_4(H_2O)_2] \cdot 2H_2O$  complexes formed by  $H_3Pam^-$  ( $M = Ni$ ),  $H_3Ale^-$  ( $M = Ni, Cu, Co$ ) and  $H_3Ner^-$  ( $M = Cd, Mn$ ).

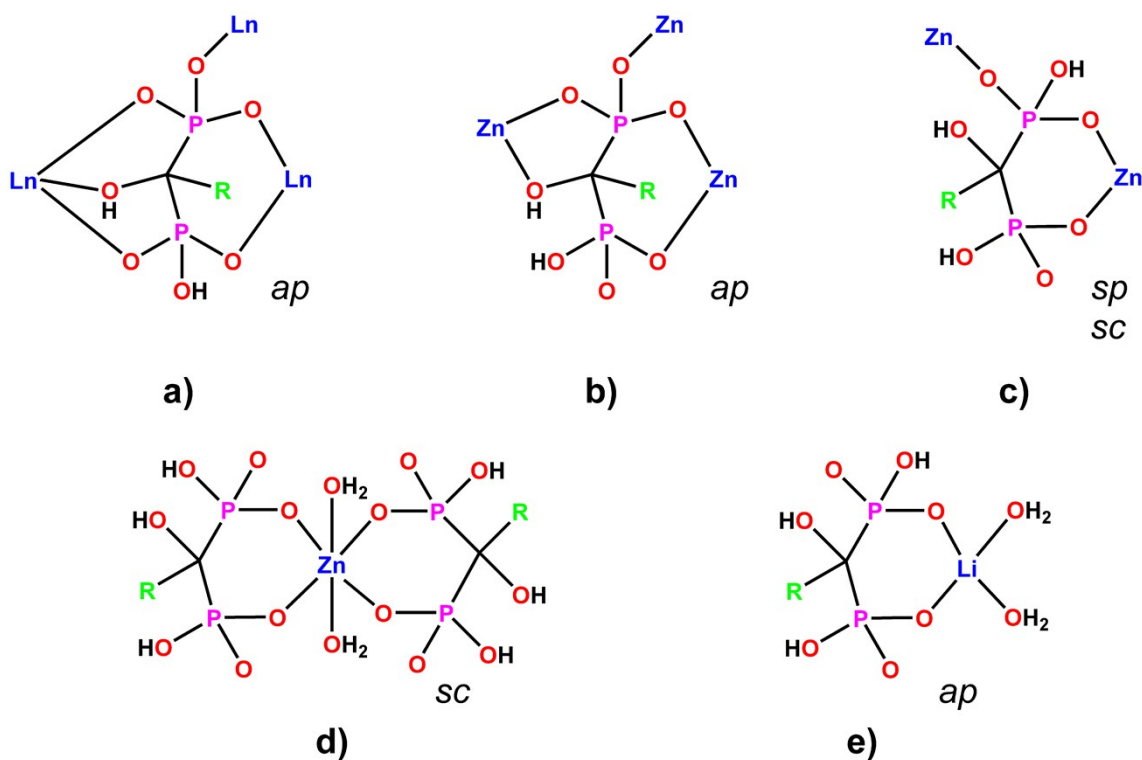

**Scheme S2.** Ligand binding modes in (a)  $[Ln(HPam)]$ , (b)  $[Zn(H_2Pam)] \cdot H_2O$ , (c)  $[Zn(H_3Pam)_2]$  (d) *trans*- $[Zn(H_3Pam)_2] \cdot 2H_2O$  and (e)  $Li[(H_3Ale)(H_2O)_2]$  complexes.

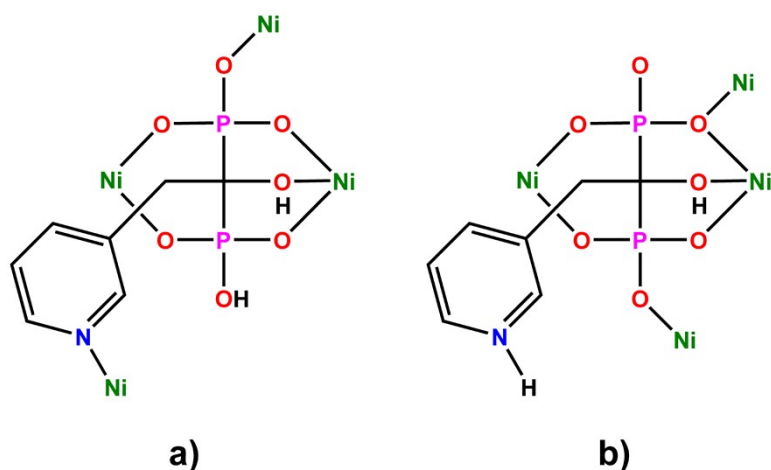

**Scheme S3.** Risedronate coordination modes in (a)  $[\text{Ni}_3(\text{HRis})_2(\text{H}_2\text{O})_4]\cdot\text{H}_2\text{O}$  and  $[\text{Ni}_3(\text{HRis})_2(\text{H}_2\text{O})_4]\cdot 3\text{H}_2\text{O}$  and (b)  $[\text{Ni}_3(\text{HRis})_2(\text{H}_2\text{O})_4]\cdot 2\text{H}_2\text{O}$

**Table S3.** Selected relative energies ( $\Delta E$ ) and torsion angles ( $\tau_1$ ) calculated for conformations and transition states of ligands 1-4.

| Conformer                                | $\Delta E$ [kcal/mol] | $\tau_1$ [°] | Conformer                                | $\Delta E$ [kcal/mol] | $\tau_1$ [°] |
|------------------------------------------|-----------------------|--------------|------------------------------------------|-----------------------|--------------|
| <i>H<sub>4</sub>dmfZol (1)</i>           |                       |              | <i>H<sub>4</sub>cbtZol (3)</i>           |                       |              |
| <i>sc<sub>1</sub>-1</i>                  | 0.00                  | -59.0        | <i>ap<sub>1</sub>-3</i>                  | 0.00                  | -179.0       |
| <i>ap<sub>1</sub>-1</i>                  | 0.70                  | -179.3       | <i>sc<sub>1</sub>-3</i>                  | 2.40                  | -60.5        |
| <i>sc<sub>2</sub>-1</i>                  | 2.96                  | +70.2        | <i>sc<sub>2</sub>-3</i>                  | 6.73                  | +70.4        |
| <i>ac<sub>1</sub>-1</i>                  | 8.52                  | +110.1       | <i>TSsc<sub>1</sub>-ap<sub>1</sub>-3</i> | 11.43                 | -108.0       |
| <i>TSsc<sub>1</sub>-ap<sub>1</sub>-1</i> | 17.69                 | -120.0       | <i>TSsc<sub>2</sub>-ap<sub>1</sub>-3</i> | 12.59                 | 118.4        |
| <i>TSac<sub>1</sub>-ap<sub>1</sub>-1</i> | 10.59                 | +120.8       | <i>TSsc<sub>1</sub>-sc<sub>2</sub>-3</i> | 12.68                 | 11.4         |
| <i>TSsc<sub>2</sub>-ac<sub>1</sub>-1</i> | 11.61                 | +99.0        |                                          |                       |              |
| <i>TSsc<sub>1</sub>-sc<sub>2</sub>-1</i> | 15.71                 | +1.1         |                                          |                       |              |
| <i>H<sub>4</sub>cppZol (2)</i>           |                       |              | <i>H<sub>4</sub>cptZol (4)</i>           |                       |              |
| <i>ap<sub>1</sub>-2</i>                  | 0.00                  | +167.8       | <i>ap<sub>1</sub>-4</i>                  | 0.00                  | +165.8       |
| <i>sc<sub>1</sub>-2</i>                  | 3.88                  | -53.9        | <i>sc<sub>1</sub>-4</i>                  | 6.01                  | +53.5        |
| <i>ap<sub>2</sub>-2</i>                  | 3.93                  | -154.1       | <i>ap<sub>2</sub>-4</i>                  | 6.73                  | -166.9       |
| <i>sc<sub>2</sub>-2</i>                  | 7.17                  | 55.7         | <i>sc<sub>2</sub>-4</i>                  | 6.51                  | +32.5        |
| <i>TSap<sub>1</sub>-ap<sub>2</sub>-2</i> | 6.66                  | -169.6       | <i>sc<sub>3</sub>-4</i>                  | 8.62                  | -27.7        |
| <i>TSap<sub>1</sub>-sc<sub>2</sub>-2</i> | 14.17                 | +105.4       | <i>sc<sub>4</sub>-4</i>                  | 9.21                  | -63.7        |
| <i>TSap<sub>2</sub>-sc<sub>1</sub>-2</i> | 11.54                 | -103.6       | <i>TSsc<sub>1</sub>-ap<sub>1</sub>-4</i> | 16.69                 | +128.1       |
| <i>TSsc<sub>1</sub>-sc<sub>2</sub>-2</i> | 15.90                 | -0.3         | <i>TSap<sub>1</sub>-ap<sub>2</sub>-4</i> | 18.45                 | -176.2       |
|                                          |                       |              | <i>TSsc<sub>4</sub>-ap<sub>2</sub>-4</i> | 19.39                 | -112.1       |
|                                          |                       |              | <i>TSsc<sub>3</sub>-sc<sub>4</sub>-4</i> | 11.59                 | -45.3        |
|                                          |                       |              | <i>TSsc<sub>1</sub>-sc<sub>2</sub>-4</i> | 6.71                  | +43.9        |
|                                          |                       |              | <i>TSsc<sub>2</sub>-sc<sub>3</sub>-4</i> | 12.51                 | -7.0         |

**Table S4.** Experimentally determined and theoretically calculated selected interatomic distances (Å), bond angles (°) and torsion angles (°) for the compound **1a**.

| <b>1a</b>             |             |               |                 |            |               |
|-----------------------|-------------|---------------|-----------------|------------|---------------|
| <i>Bond lengths</i>   |             |               |                 |            |               |
|                       | <i>Exp.</i> | <i>Theory</i> |                 | <i>Exp</i> | <i>Theory</i> |
| P1A–O1A               | 1.500(4)    | 1.536         | P1B–O1B         | 1.499(4)   | 1.540         |
| P1A–O2A               | 1.508(5)    | 1.585         | P1B–O2B         | 1.510(4)   | 1.589         |
| P1A–O3A               | 1.568(4)    | 1.694         | P1B–O3B         | 1.553(4)   | 1.715         |
| P2A–O4A               | 1.489(4)    | 1.537         | P2B–O4B         | 1.490(4)   | 1.541         |
| P2A–O5A               | 1.524(4)    | 1.583         | P2B–O5B         | 1.511(5)   | 1.604         |
| P2A–O6A               | 1.568(4)    | 1.661         | P2B–O6B         | 1.570(4)   | 1.647         |
| RMSD <sup>a</sup>     |             | 0.079         |                 |            | 0.093         |
| <i>Bond angles</i>    |             |               |                 |            |               |
| N1A–C2A–C1A           | 107.2(4)    | 104.9         | N1B–C2B–C1B     | 109.1(4)   | 106.3         |
| O1A–P1A–O2A           | 116.6(2)    | 116.2         | O1B–P1B–O2B     | 114.4(2)   | 121.7         |
| O1A–P1A–O3A           | 108.8(2)    | 112.3         | O1B–P1B–O3B     | 111.7(2)   | 107.6         |
| O2A–P1A–O3A           | 109.1(2)    | 104.9         | O2B–P1B–O3B     | 109.8(2)   | 104.4         |
| O4A–P2A–O5A           | 114.5(2)    | 118.0         | O4B–P2B–O5B     | 114.5(2)   | 116.4         |
| O4A–P2A–O6A           | 107.9(2)    | 111.4         | O4B–P2B–O6B     | 108.8(2)   | 109.1         |
| O5A–P2A–O6A           | 108.7(2)    | 106.4         | O5B–P2B–O6B     | 107.9(2)   | 107.7         |
| RMSD <sup>b</sup>     |             | 3.1           |                 |            | 4.0           |
| <i>Torsion angles</i> |             |               |                 |            |               |
| O7A–C1A–C2A–N1A       | -54.2(5)    | -56.3         | O7B–C1B–C2B–N1B | 55.0(5)    | 55.1          |
| P1A–C1A–C2A–N1A       | 70.7(4)     | 60.1          | P1B–C1B–C2B–N1B | -65.2(4)   | -63.9         |
| P2A–C1A–C2A–N1A       | -166.9(3)   | -171.7        | P2B–C1B–C2B–N1B | 169.3(3)   | 173.0         |
| O7A–C1A–C2A–C3A       | 62.9(6)     | 59.5          | O7B–C1B–C2B–C3B | -61.9(5)   | -61.3         |
| P1A–C1A–C2A–C3A       | -172.2(4)   | 175.9         | P1B–C1B–C2B–C3B | 177.8(3)   | 179.7         |
| P2A–C1A–C2A–C3A       | -49.8(5)    | -55.9         | P2B–C1B–C2B–C3B | 52.4(5)    | 55.6          |
| O7A–C1A–C2A–C4A       | -174.2(5)   | -176.4        | O7B–C1B–C2B–C4B | 175.3(5)   | 175.0         |
| P1A–C1A–C2A–C4A       | -49.3(6)    | -60.1         | P1B–C1B–C2B–C4B | 55.0(5)    | 56.0          |
| P2A–C1A–C2A–C4A       | 73.1(5)     | 68.2          | P2B–C1B–C2B–C4B | -70.5(5)   | -67.1         |
| RMSD <sup>b</sup>     |             | 7.3           |                 |            | 2.2           |

<sup>a</sup>Root mean square deviation of distances (RMSD, in Å) for both ligands. <sup>b</sup>Root mean square deviation of bond and torsion angles (RMSD, in °) for both ligands.

**Table S5.** Experimentally determined and theoretically calculated selected interatomic distances (Å), bond angles (°) and torsion angles (°) for the compounds **3a** and **4a**.

|                       | <b>3a</b>   |               | <b>4a</b>   |               |
|-----------------------|-------------|---------------|-------------|---------------|
| <i>Bond lengths</i>   | <i>Exp.</i> | <i>Theory</i> | <i>Exp.</i> | <i>Theory</i> |
| P1–O1                 | 1.4991(18)  | 1.5442        | 1.498(2)    | 1.544         |
| P1–O2                 | 1.5087(17)  | 1.5756        | 1.505(2)    | 1.575         |
| P1–O3                 | 1.5628(18)  | 1.7006        | 1.564(2)    | 1.702         |
| P2–O4                 | 1.5011(18)  | 1.5359        | 1.498(2)    | 1.536         |
| P2–O5                 | 1.5259(17)  | 1.5749        | 1.520(2)    | 1.574         |
| P2–O6                 | 1.5593(19)  | 1.7091        | 1.566(2)    | 1.711         |
| RMSD <sup>a</sup>     |             | 0.0927        |             | 0.093         |
| <i>Bond angles</i>    |             |               |             |               |
| N1–C2–C1              | 108.75(18)  | 108.61        | 108.4(2)    | 107.4         |
| O1–P1–O2              | 114.69(10)  | 120.49        | 114.91(12)  | 120.53        |
| O1–P1–O3              | 112.06(10)  | 108.62        | 111.84(11)  | 108.15        |
| O2–P1–O3              | 111.19(10)  | 107.78        | 110.70(12)  | 107.31        |
| O4–P2–O5              | 112.19(10)  | 121.51        | 112.72(11)  | 121.48        |
| O4–P2–O6              | 112.80(10)  | 108.23        | 112.40(11)  | 108.17        |
| O5–P2–O6              | 108.24(10)  | 105.45        | 107.66(12)  | 105.38        |
| RMSD <sup>b</sup>     |             | 4.97          |             | 4.74          |
| <i>Torsion angles</i> |             |               |             |               |
| O7–C1–C2–N1           | -64.3(2)    | -73.2         | -65.2(3)    | -73.9         |
| P1–C1–C2–N1           | 53.2(2)     | 44.8          | 51.4(3)     | 43.1          |
| P2–C1–C2–N1           | 179.21(15)  | 170.33        | 178.40(17)  | 169.45        |
| O7–C1–C2–C3           | 59.6(3)     | 50.7          | 52.9(3)     | 44.9          |
| P1–C1–C2–C3           | 177.15(17)  | 168.80        | 169.57(19)  | 161.83        |
| P2–C1–C2–C3           | -56.8(3)    | -65.7         | -63.5(3)    | -71.8         |
| O7–C1–C2–C5           | 167.02(19)  | 156.84        | -           | -             |
| P1–C1–C2–C5           | -75.5(2)    | -85.1         | -           | -             |
| P2–C1–C2–C5           | 50.5(3)     | 40.4          | -           | -             |
| O7–C1–C2–C6           | -           | -             | 171.6(2)    | 162.9         |
| P1–C1–C2–C6           | -           | -             | -71.7(3)    | -80.2         |
| P2–C1–C2–C6           | -           | -             | 55.2(3)     | 46.2          |
| RMSD <sup>b</sup>     |             | 9.2           |             | 8.5           |

<sup>a</sup>Root mean square deviation of distances (RMSD, in Å) for compounds **3a** and **4a**. <sup>b</sup>Root mean square deviation of bond and torsion angles (RMSD, in °) for compounds **3a** and **4a**.

**Table S6.** Experimentally determined and theoretically calculated selected interatomic distances (Å) and bond angles (°) related to the metal center for the compounds **1a**, **3a** and **4a**.

| <b>1a</b>               |             |               |                        |            |               |
|-------------------------|-------------|---------------|------------------------|------------|---------------|
| <i>Bond lengths (Å)</i> | <i>Exp.</i> | <i>Theory</i> | <i>Bond angles (°)</i> | <i>Exp</i> | <i>Theory</i> |
| Cu1–O2A                 | 1.941(5)    | 1.990         | O2A–Cu1–O5A            | 91.02(18)  | 89.33         |
| Cu1–O5A                 | 1.955(4)    | 1.942         | O2A–Cu1–O5B            | 88.69(19)  | 84.10         |
| Cu1–O2B                 | 1.933(4)    | 1.976         | O2A–Cu1–O1W            | 85.97(15)  | 102.96        |
| Cu1–O5B                 | 1.961(4)    | 1.988         | O5A–Cu1–O5B            | 171.26(16) | 168.96        |
| Cu1–O1W                 | 2.435(4)    | 2.439         | O5A–Cu1–O1W            | 101.94(15) | 105.64        |
| RMSD <sup>a</sup>       |             | 0.003         | O2B–Cu1–O2A            | 174.12(16) | 170.22        |
|                         |             |               | O2B–Cu1–O5A            | 87.33(18)  | 88.04         |
|                         |             |               | O2B–Cu1–O5B            | 92.09(18)  | 96.96         |
|                         |             |               | O2B–Cu1–O1W            | 99.89(15)  | 86.82         |
|                         |             |               | O5B–Cu1–O1W            | 86.76(15)  | 84.53         |
|                         |             |               | RMSD <sup>b</sup>      |            | 7.39          |

  

| <b>3a</b>                 |             |               | <b>4a</b>   |               |
|---------------------------|-------------|---------------|-------------|---------------|
| <i>Bond lengths (Å)</i>   | <i>Exp.</i> | <i>Theory</i> | <i>Exp.</i> | <i>Theory</i> |
| Cu1–O2, O2 <sup>i</sup>   | 1.9103(19)  | 1.9968        | 1.910(2)    | 1.994         |
| Cu1–O5, O5 <sup>i</sup>   | 1.9440(18)  | 1.9507        | 1.939(2)    | 1.951         |
| Cu1–O1W, O1W <sup>i</sup> | 2.733(3)    | 2.547         | 2.725(3)    | 2.550         |
| RMSD <sup>a</sup>         |             | 0.118         |             | 0.113         |
| <i>Bond angles (°)</i>    |             |               |             |               |
| O2–Cu1–O2 <sup>i</sup>    | 180.0       | 180.0         | 180.0       | 180.0         |
| O2–Cu1–O5 <sup>i</sup>    | 87.18(8)    | 86.06         | 87.85(8)    | 85.82         |
| O2–Cu1–O5                 | 92.82(8)    | 93.94         | 92.15(8)    | 94.17         |
| O2–Cu1–O1W <sup>i</sup>   | 78.05(7)    | 72.79         | 80.60(8)    | 72.76         |
| O5 <sup>i</sup> –Cu1–O5   | 180.0       | 180.0         | 180.0       | 180.0         |
| O5–Cu1–O1W <sup>i</sup>   | 97.83(7)    | 91.93         | 97.98(8)    | 93.68         |
| O1W–Cu1–O2                | 101.95(7)   | 107.19        | 99.40(8)    | 107.22        |
| O1W–Cu1–O5                | 82.17(7)    | 88.09         | 82.02(8)    | 86.34         |
| O1W–Cu1–O1W <sup>i</sup>  | 180.0       | 180.0         | 180.0       | 180.0         |
| RMSD <sup>b</sup>         |             | 3.76          |             | 4.32          |

<sup>a</sup>Root mean square deviation of distances (RMSD, in Å). <sup>b</sup>Root mean square deviation of bond angles (RMSD, in °). Symmetry code: (i)  $-x+1, -y+1, -z+1$ .

**Table S7.** Selected hydrogen bonds for compound **1a**.

| <i>D</i> –H··· <i>A</i>                                  | <i>D</i> –H | H··· <i>A</i> | <i>D</i> ··· <i>A</i> | <i>D</i> –H··· <i>A</i> |
|----------------------------------------------------------|-------------|---------------|-----------------------|-------------------------|
| <i>Compound 1</i>                                        |             |               |                       |                         |
| O3 <i>A</i> –H3 <i>A</i> ···O1 <i>B</i> <sup>ii</sup>    | 0.84        | 1.81          | 2.579(5)              | 151                     |
| O6 <i>A</i> –H6 <i>A</i> ···O2 <i>W</i>                  | 0.84        | 2.10          | 2.616(6)              | 120                     |
| O7 <i>A</i> –H7 <i>A</i> ···O8 <i>W</i> <sup>iii</sup>   | 0.84        | 1.91          | 2.695(6)              | 154                     |
| N2 <i>A</i> –H2 <i>A</i> ···O5 <i>A</i> <sup>ii</sup>    | 0.88        | 1.90          | 2.755(7)              | 162                     |
| O3 <i>B</i> –H3 <i>B</i> ···O1 <i>A</i> <sup>iv</sup>    | 0.84        | 1.74          | 2.555(5)              | 162                     |
| O6 <i>B</i> –H6 <i>B</i> ···O6 <i>W</i>                  | 0.84        | 1.69          | 2.520(6)              | 171                     |
| O7 <i>B</i> –H7 <i>B</i> ···O3 <i>W</i> <sup>v</sup>     | 0.84        | 2.30          | 2.969(6)              | 137                     |
| N2 <i>B</i> –H2 <i>B</i> ···O5 <i>B</i> <sup>vi</sup>    | 0.88        | 1.92          | 2.795(7)              | 179                     |
| O1 <i>W</i> –H1 <i>W</i> ···O2 <i>W</i>                  | 0.84        | 2.16          | 2.869(6)              | 142                     |
| O1 <i>W</i> –H2 <i>W</i> ···O3 <i>W</i>                  | 0.84        | 2.18          | 2.979(6)              | 158                     |
| O2 <i>W</i> –H3 <i>W</i> ···O7 <i>A</i>                  | 0.84        | 2.48          | 3.302(7)              | 167                     |
| O2 <i>W</i> –H4 <i>W</i> ···O5 <i>W</i>                  | 0.84        | 1.97          | 2.806(6)              | 176                     |
| O3 <i>W</i> –H5 <i>W</i> ···O4 <i>B</i>                  | 0.84        | 1.93          | 2.734(5)              | 160                     |
| O3 <i>W</i> –H6 <i>W</i> ···O3 <i>A</i> <sup>iv</sup>    | 0.84        | 2.18          | 2.993(6)              | 164                     |
| O4 <i>W</i> –H7 <i>W</i> ···O7 <i>A</i>                  | 0.84        | 2.09          | 2.886(6)              | 157                     |
| O4 <i>W</i> –H8 <i>W</i> ···O6 <i>B</i> <sup>vii</sup>   | 0.84        | 2.08          | 2.880(7)              | 159                     |
| O5 <i>W</i> –H9 <i>W</i> ···O9 <i>W</i> <sup>iii</sup>   | 0.84        | 2.08          | 2.801(9)              | 144                     |
| O5 <i>W</i> –H10 <i>W</i> ···O4 <i>B</i> <sup>vii</sup>  | 0.84        | 1.96          | 2.789(6)              | 168                     |
| O6 <i>W</i> –H11 <i>W</i> ···O9 <i>W</i> <sup>viii</sup> | 0.84        | 1.83          | 2.659(6)              | 169                     |
| O6 <i>W</i> –H12 <i>W</i> ···O7 <i>W</i>                 | 0.84        | 1.95          | 2.775(7)              | 169                     |
| O7 <i>W</i> –H13 <i>W</i> ···O1 <i>A</i>                 | 0.84        | 2.11          | 2.876(7)              | 151                     |
| O7 <i>W</i> –H14 <i>W</i> ···O3 <i>W</i> <sup>v</sup>    | 0.84        | 2.09          | 2.888(7)              | 159                     |
| O8 <i>W</i> –H15 <i>W</i> ···O1 <i>B</i> <sup>ix</sup>   | 0.84        | 1.99          | 2.822(6)              | 169                     |
| O8 <i>W</i> –H16 <i>W</i> ···O4 <i>A</i>                 | 0.84        | 1.88          | 2.699(5)              | 163                     |
| O9 <i>W</i> –H17 <i>W</i> ···O4 <i>W</i> <sup>v</sup>    | 0.84        | 2.03          | 2.684(7)              | 134                     |
| O9 <i>W</i> –H18 <i>W</i> ···O4 <i>A</i>                 | 0.84        | 1.98          | 2.740(6)              | 149                     |
| C3 <i>A</i> –H3 <i>AC</i> ···O4 <i>W</i>                 | 0.98        | 2.38          | 3.357(7)              | 171                     |
| C4 <i>A</i> –H4 <i>AA</i> ···O2 <i>W</i> <sup>ix</sup>   | 0.98        | 2.48          | 3.362(8)              | 149                     |
| C4 <i>A</i> –H4 <i>AB</i> ···O1 <i>A</i>                 | 0.98        | 2.57          | 3.106(7)              | 114                     |
| C4 <i>A</i> –H4 <i>AB</i> ···O3 <i>B</i> <sup>ix</sup>   | 0.98        | 2.48          | 3.390(7)              | 154                     |
| C4 <i>A</i> –H4 <i>AC</i> ···O4 <i>A</i>                 | 0.98        | 2.37          | 3.131(8)              | 133                     |
| C21 <i>A</i> –H21 <i>A</i> ···O1 <i>W</i> <sup>ix</sup>  | 0.95        | 2.58          | 3.473(6)              | 156                     |
| C4 <i>B</i> –H4 <i>BB</i> ···O4 <i>B</i>                 | 0.98        | 2.35          | 3.108(8)              | 133                     |
| C4 <i>B</i> –H4 <i>BC</i> ···O3 <i>B</i>                 | 0.98        | 2.57          | 3.159(7)              | 119                     |
| C21 <i>B</i> –H21 <i>B</i> ···O7 <i>W</i> <sup>iv</sup>  | 0.95        | 2.50          | 3.442(7)              | 171                     |
| C41 <i>B</i> –H41 <i>B</i> ···O6 <i>W</i> <sup>vi</sup>  | 0.95        | 2.55          | 3.251(8)              | 131                     |

Symmetry codes: (ii)  $x+1, y+1, z$ ; (iii)  $x+1, y, z$ ; (iv)  $x, y-1, z$ ; (v)  $x-1, y, z$ ; (vi)  $x-1, y-1, z$ ; (vii)  $x, y, z-1$ ; (viii)  $x, y, z+1$ ; (ix)  $x, y+1, z$ .



**Table S8.** Selected hydrogen bonds for compounds **3a** and **4a**.

| <i>D</i> –H··· <i>A</i>                               | <i>D</i> –H | H··· <i>A</i> | <i>D</i> ··· <i>A</i> | <i>D</i> –H··· <i>A</i> |
|-------------------------------------------------------|-------------|---------------|-----------------------|-------------------------|
| <i>Compound 3a</i>                                    |             |               |                       |                         |
| O3–H3···O5 <sup>v</sup>                               | 0.84        | 1.84          | 2.666(3)              | 168                     |
| O6–H6···O4 <sup>x</sup>                               | 0.84        | 1.68          | 2.521(3)              | 177                     |
| O7–H7···O1 <sup>W</sup>                               | 0.84        | 2.22          | 3.029(3)              | 161                     |
| N2–H2 <sup>N</sup> ···O1 <sup>xi</sup>                | 0.88        | 1.77          | 2.614(3)              | 159                     |
| O1 <sup>W</sup> –H1 <sup>W</sup> ···O6 <sup>i</sup>   | 0.84        | 2.40          | 3.225(3)              | 169                     |
| O1 <sup>W</sup> –H2 <sup>W</sup> ···O1 <sup>iii</sup> | 0.84        | 1.99          | 2.810(3)              | 164                     |
| C3–H3 <sup>A</sup> ···O4                              | 0.99        | 2.31          | 3.067(3)              | 132                     |
| C41–H41···O7 <sup>v</sup>                             | 0.95        | 2.58          | 3.155(3)              | 120                     |
| C51–H51···O4 <sup>v</sup>                             | 0.95        | 2.31          | 3.261(3)              | 176                     |
| <i>Compound 4a</i>                                    |             |               |                       |                         |
| O3–H3···O5 <sup>v</sup>                               | 0.84        | 1.88          | 2.689(3)              | 161                     |
| O6–H6···O4 <sup>x</sup>                               | 0.84        | 1.72          | 2.552(3)              | 174                     |
| O7–H7···O1 <sup>W</sup>                               | 0.84        | 2.23          | 3.053(3)              | 166                     |
| N2–H2 <sup>N</sup> ···O1 <sup>xi</sup>                | 0.88        | 1.81          | 2.646(4)              | 158                     |
| O1 <sup>W</sup> –H1 <sup>W</sup> ···O6 <sup>i</sup>   | 0.84        | 2.48          | 3.218(3)              | 147                     |
| O1 <sup>W</sup> –H2 <sup>W</sup> ···O1 <sup>iii</sup> | 0.84        | 1.98          | 2.808(3)              | 169                     |
| C3–H3 <sup>B</sup> ···O4                              | 0.99        | 2.25          | 3.056(4)              | 138                     |
| C6–H6 <sup>B</sup> ···O4 <sup>x</sup>                 | 0.99        | 2.53          | 3.501(4)              | 169                     |
| C41–H41···O7 <sup>v</sup>                             | 0.95        | 2.49          | 3.118(4)              | 124                     |
| C51–H51···O4 <sup>v</sup>                             | 0.95        | 2.27          | 3.216(4)              | 177                     |

Symmetry codes: (x)  $-x+1, -y+1, -z+2$ ; (xi)  $-x, -y, -z+1$ .

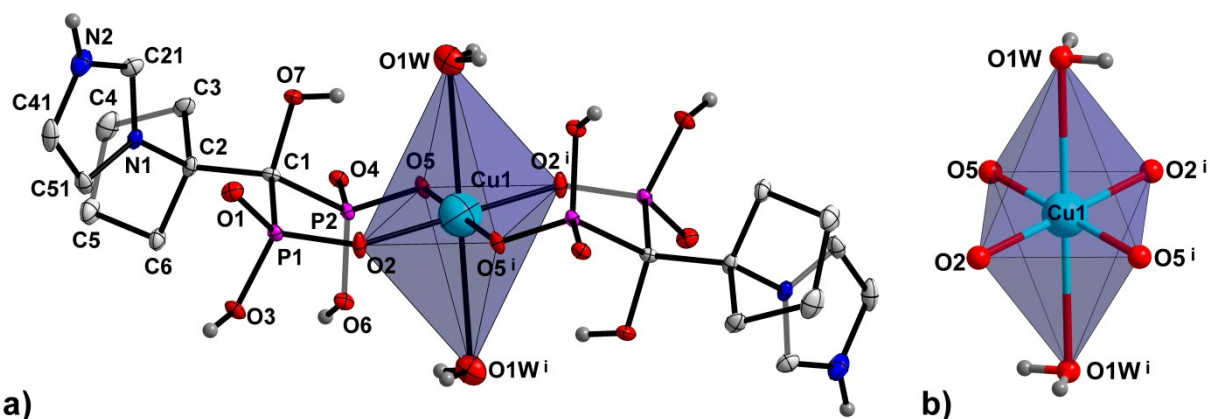

**Figure S4.** (a) The discrete coordination unit of complex **4a** with the atom-numbering scheme. Displacement ellipsoids except Cu1 atom are drawn at 50% probability level. All C-bond H-atoms are omitted for clarity. (b) Coordination environment of Cu1 center. Symmetry code (i)  $-x+1, -y+1, -z+1$ .

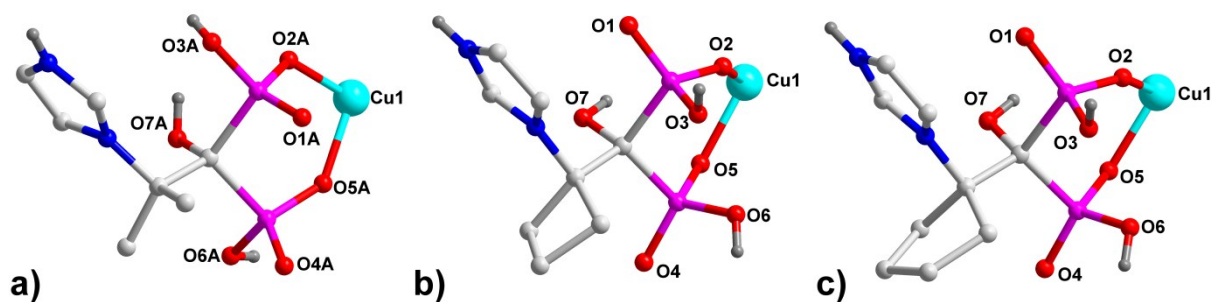

**Figure S5.** Coordination modes of (a)  $\text{H}_3\text{dmtZol}^-$  in **1a**, (b)  $\text{H}_3\text{cbtZol}^-$  in **3a** and (c)  $\text{H}_3\text{cptZol}^-$  in **4a**. All C-bond H-atoms are omitted for clarity

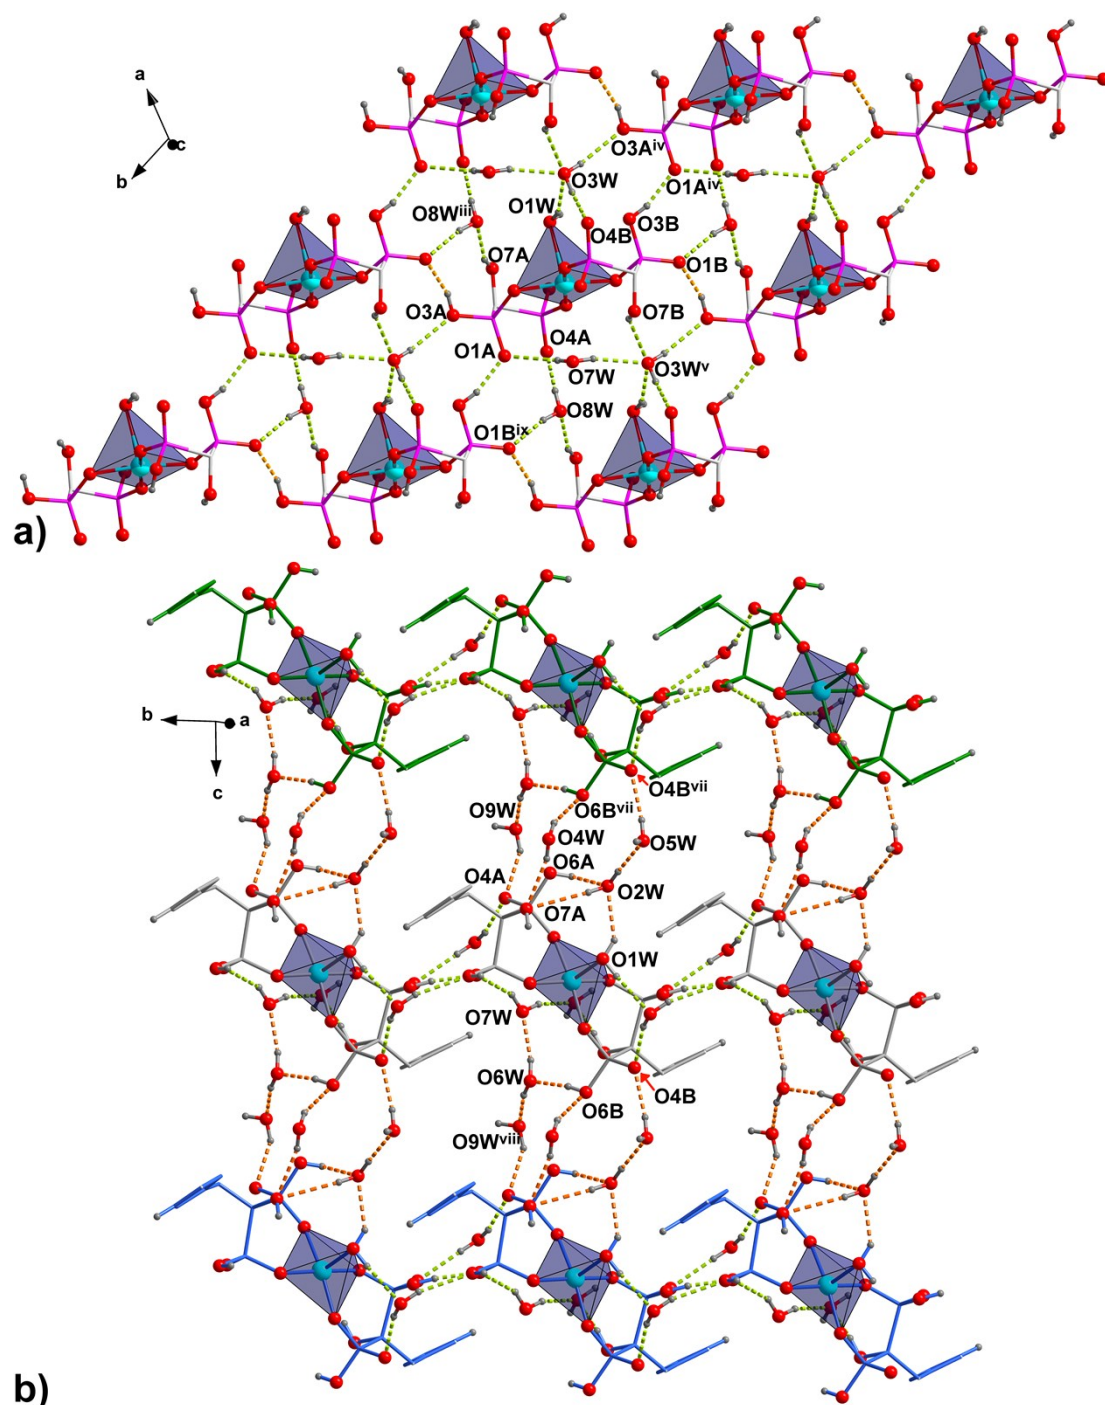

**Figure S6.** The crystal packing of **1a**. (a) The role of lattice water molecules in stabilization of 2D layer. (c) Assembling of neighbouring layers (shown in green, grey and light blue) into 3D supramolecular network through O–H $\cdots$ O interaction mediated by lattice water molecules. All C-bounded H-atoms, methyl groups, imidazole ring (picture a) and lattice water molecules not involved in arrangement of 2D or 3D structures are omitted for clarity. The intra- and interlayer hydrogen bond network is shown as lime and orange dashed lines, respectively. Symmetry codes are given in Table S7.

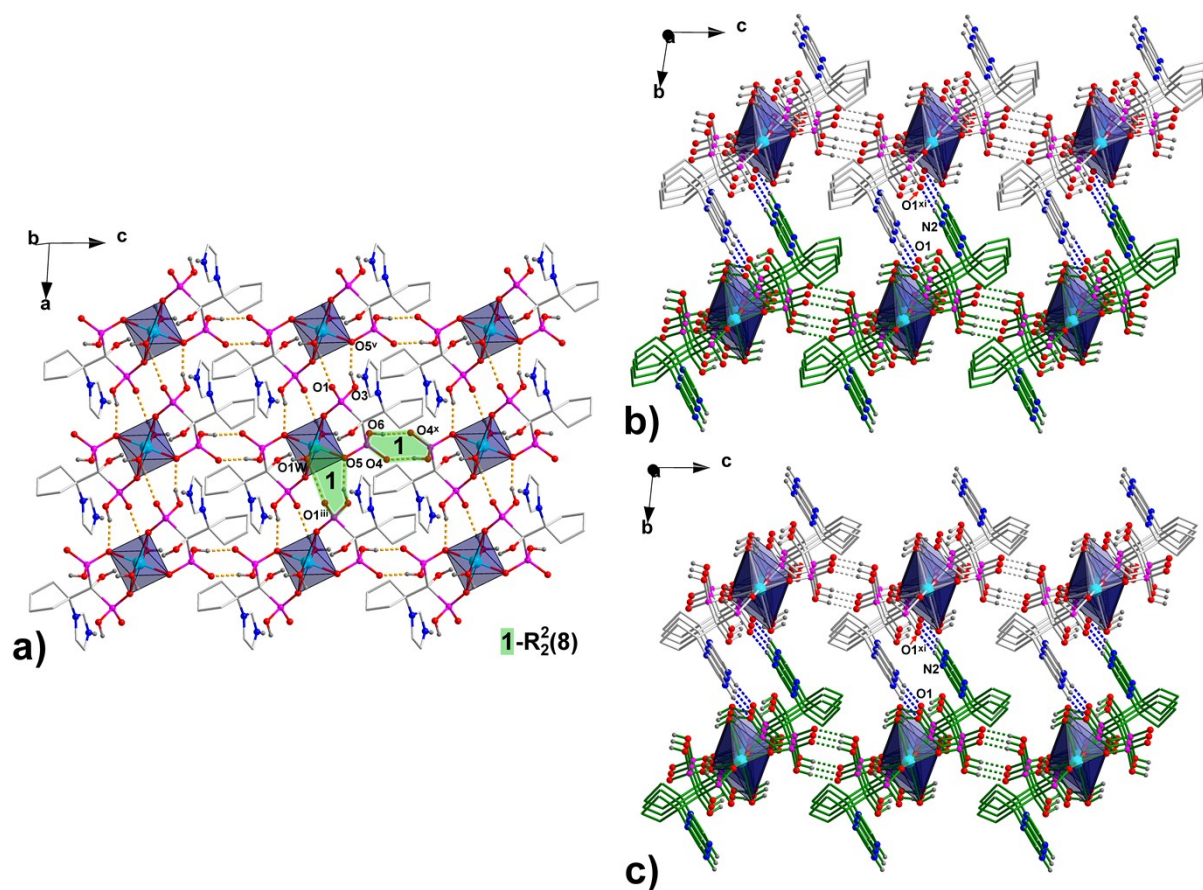

**Figure S7.** (a) The 2D layer of **4a** generated by means of O–H···O hydrogen bonds shown as light orange dashed lines. (b) and (c) Connection of neighbouring layers (shown in grey and green) into 3D supramolecular network through N–H···O interactions (blue dashed lines) in **4a** and **3a**, respectively. All C-bounded H-atoms are omitted for clarity. Symmetry codes are given in Table S8.

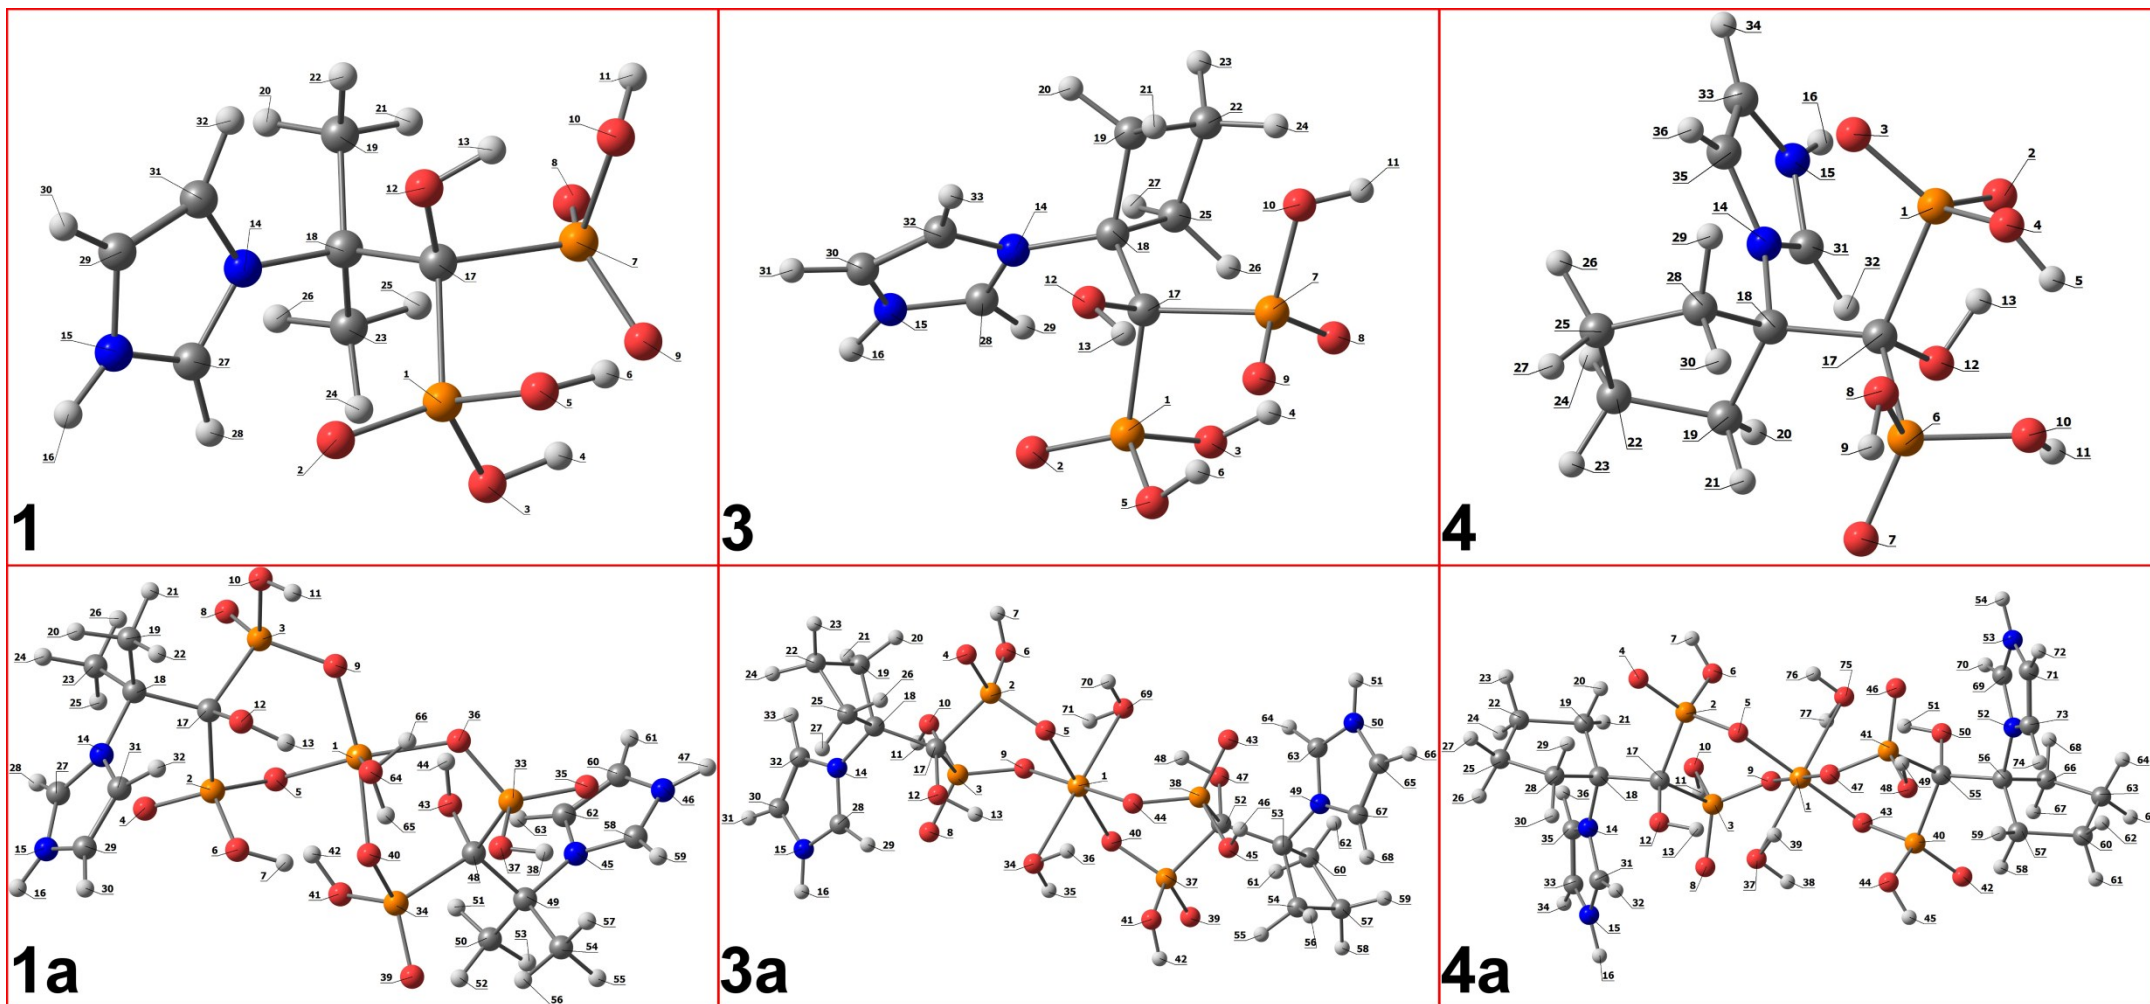

Figure S8. Optimized molecular geometry and the atom-numbering scheme of ligands 1, 3 and 4 and related complexes 1a, 3a and 4a.



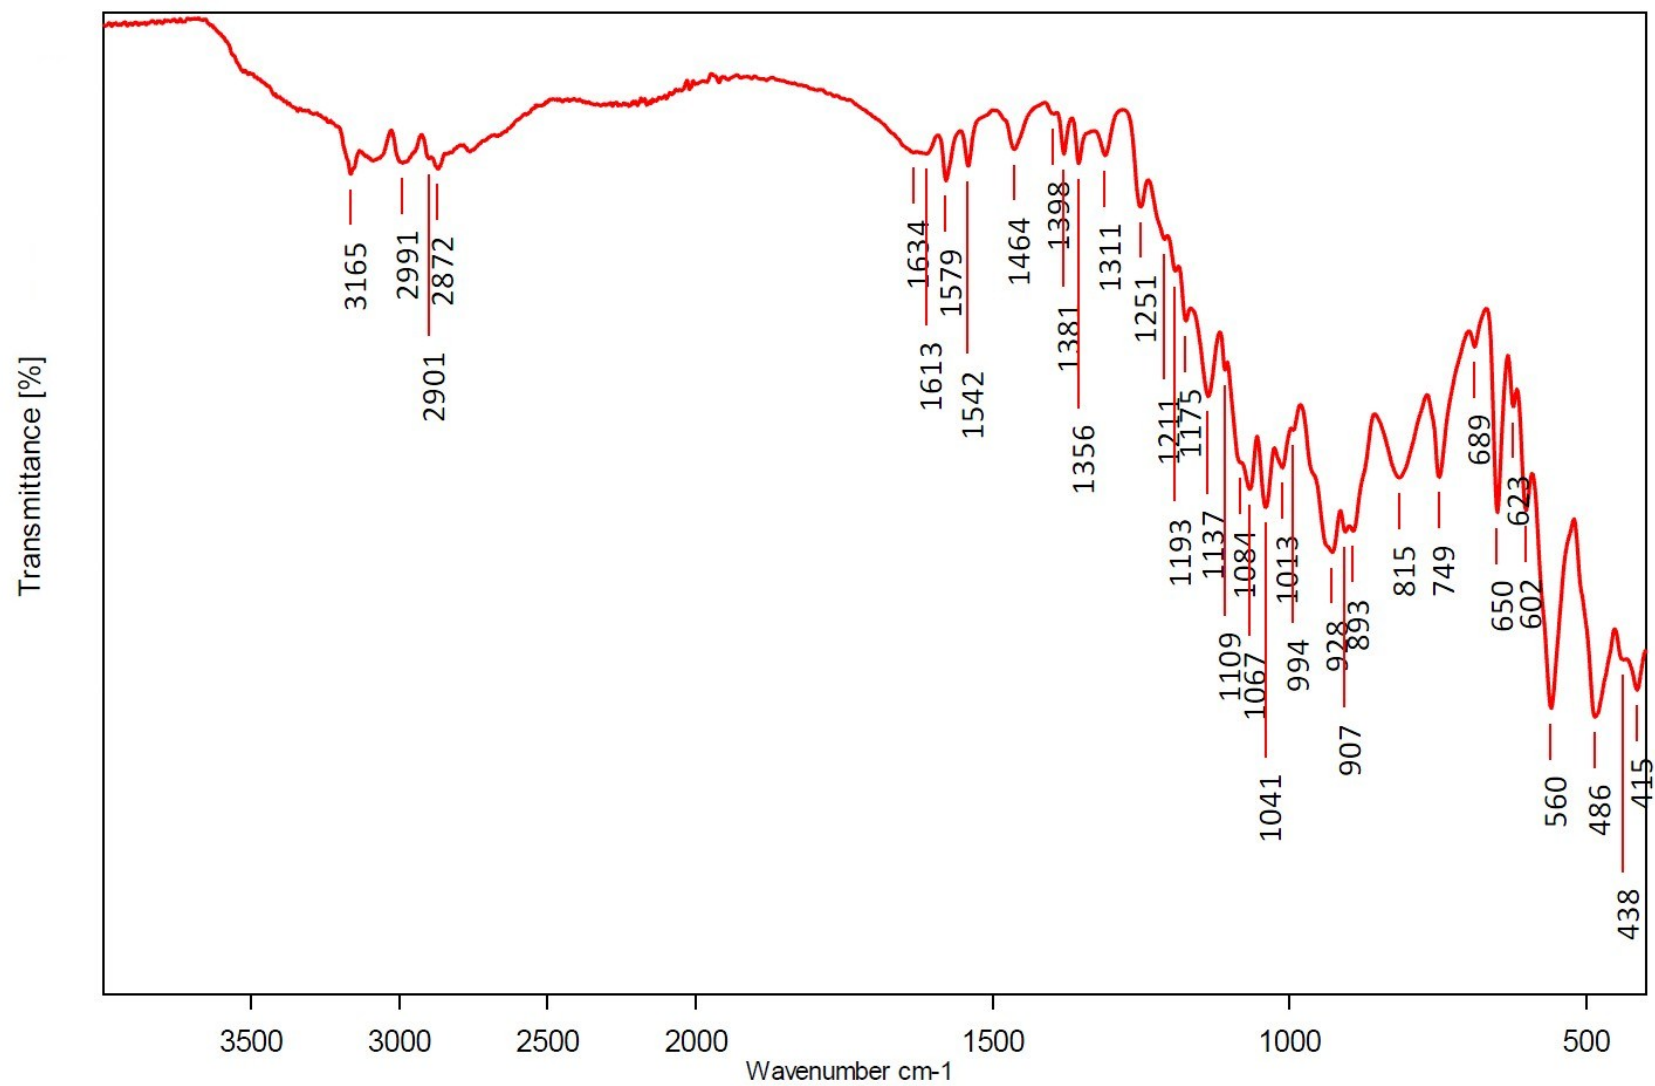

**Figure S9.** Experimental IR spectrum of complex **1a**.

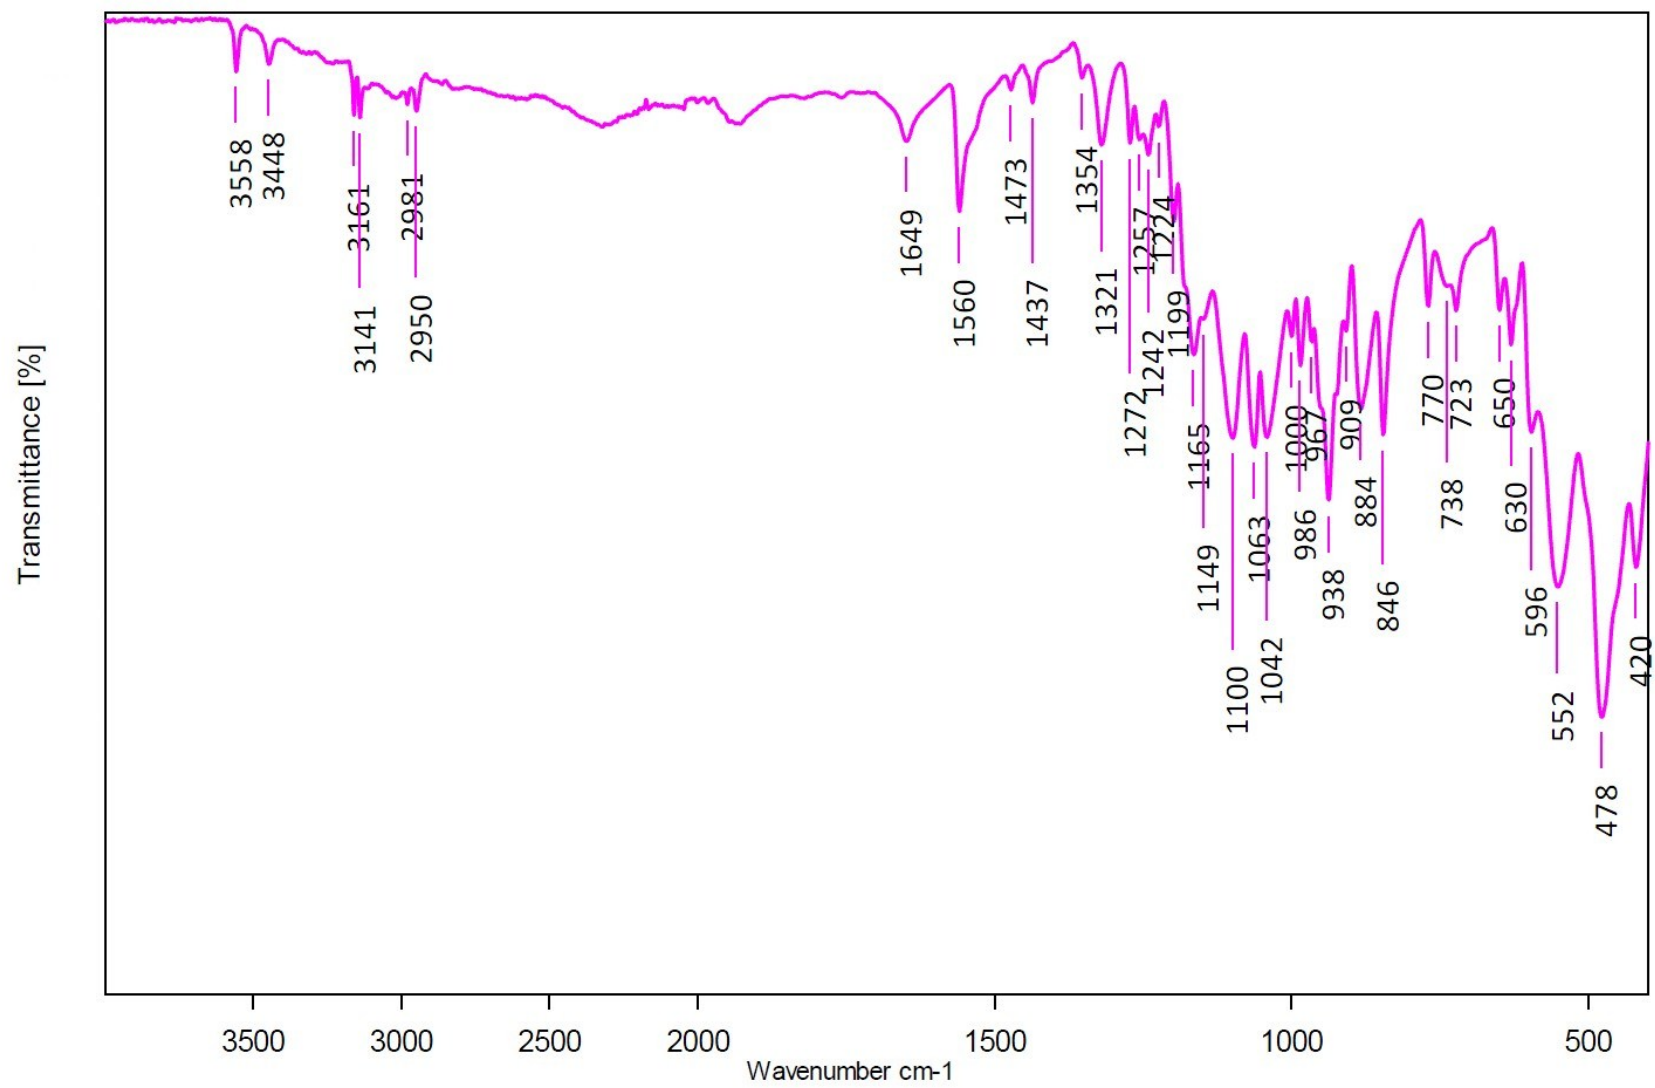

**Figure S10.** Experimental IR spectrum of complex **3a**.

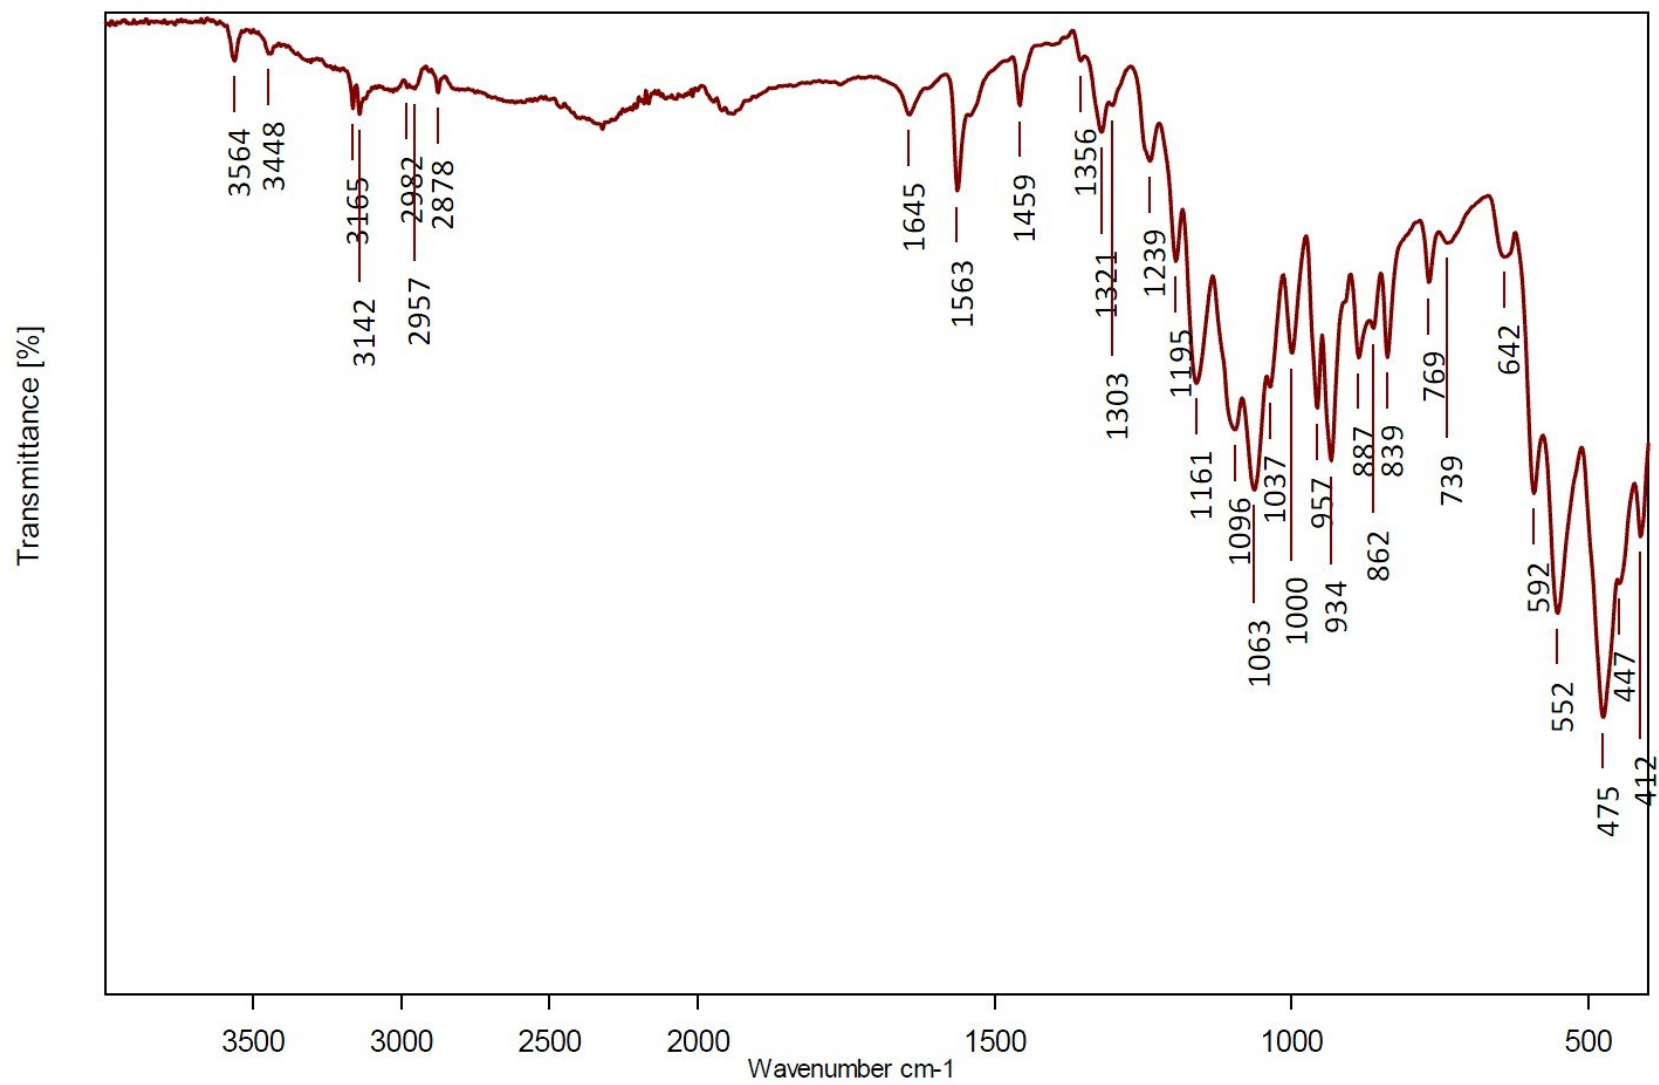

**Figure S11.** Experimental IR spectrum of complex **4a**.



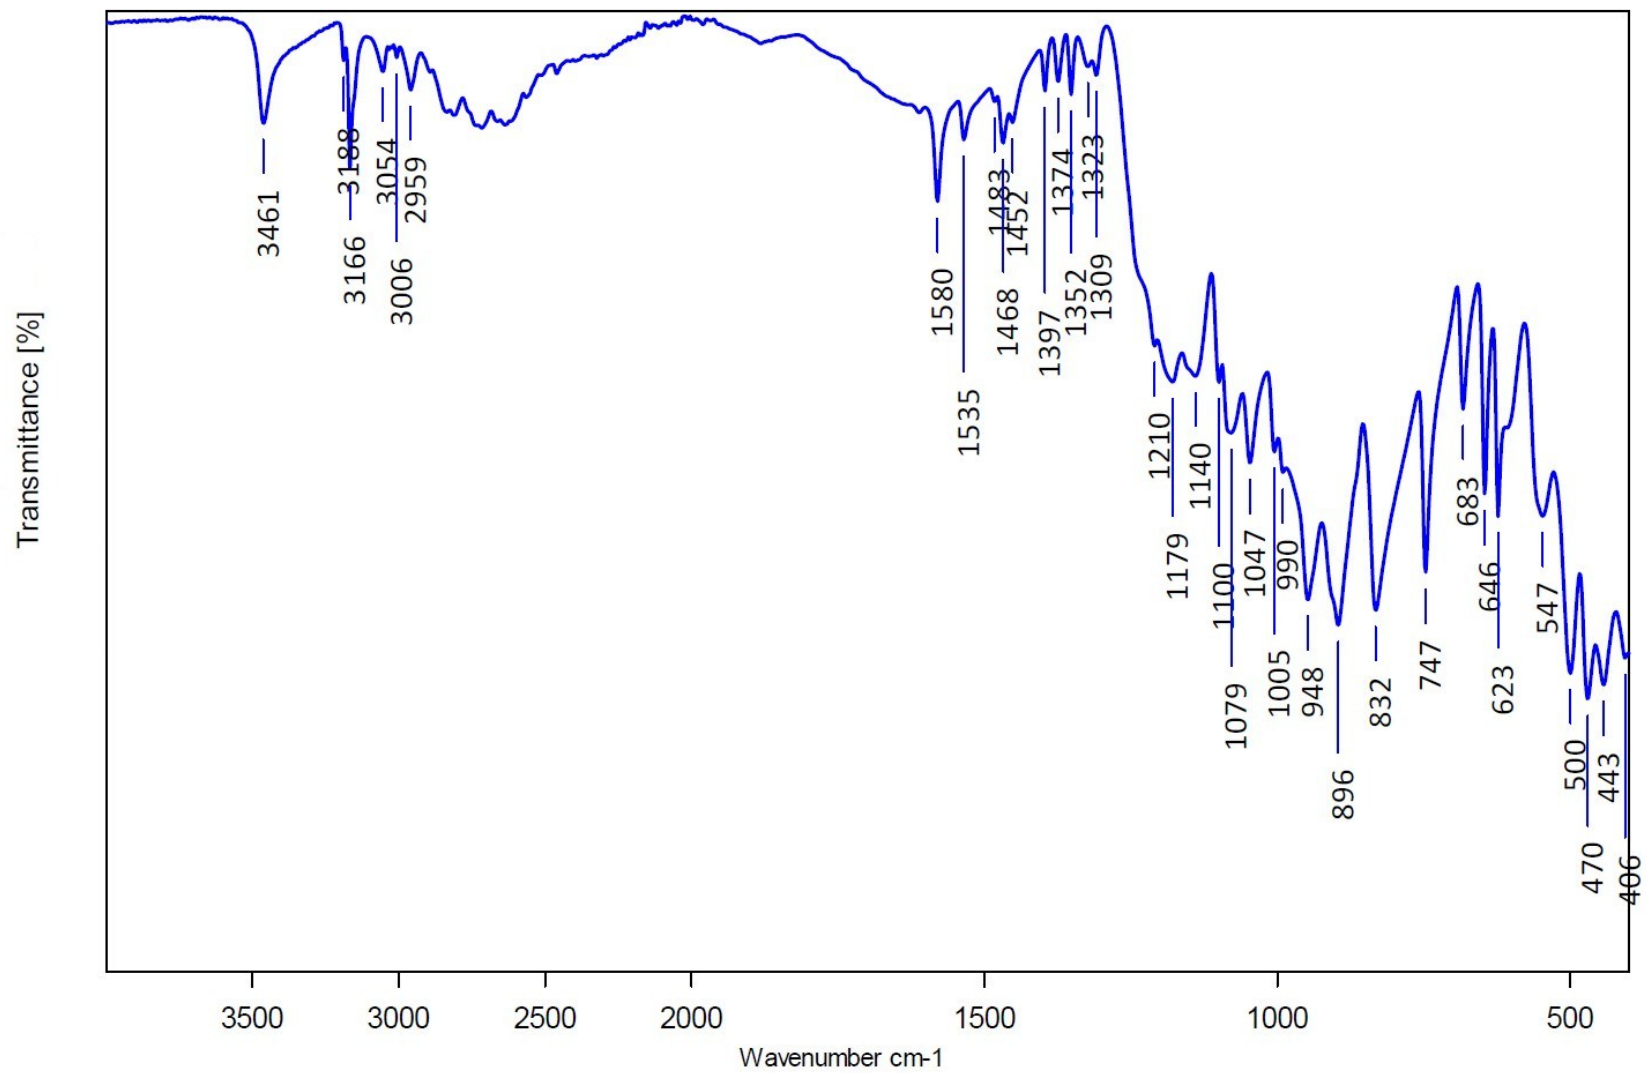

**Figure S12.** Experimental IR spectrum of ligand **1**.

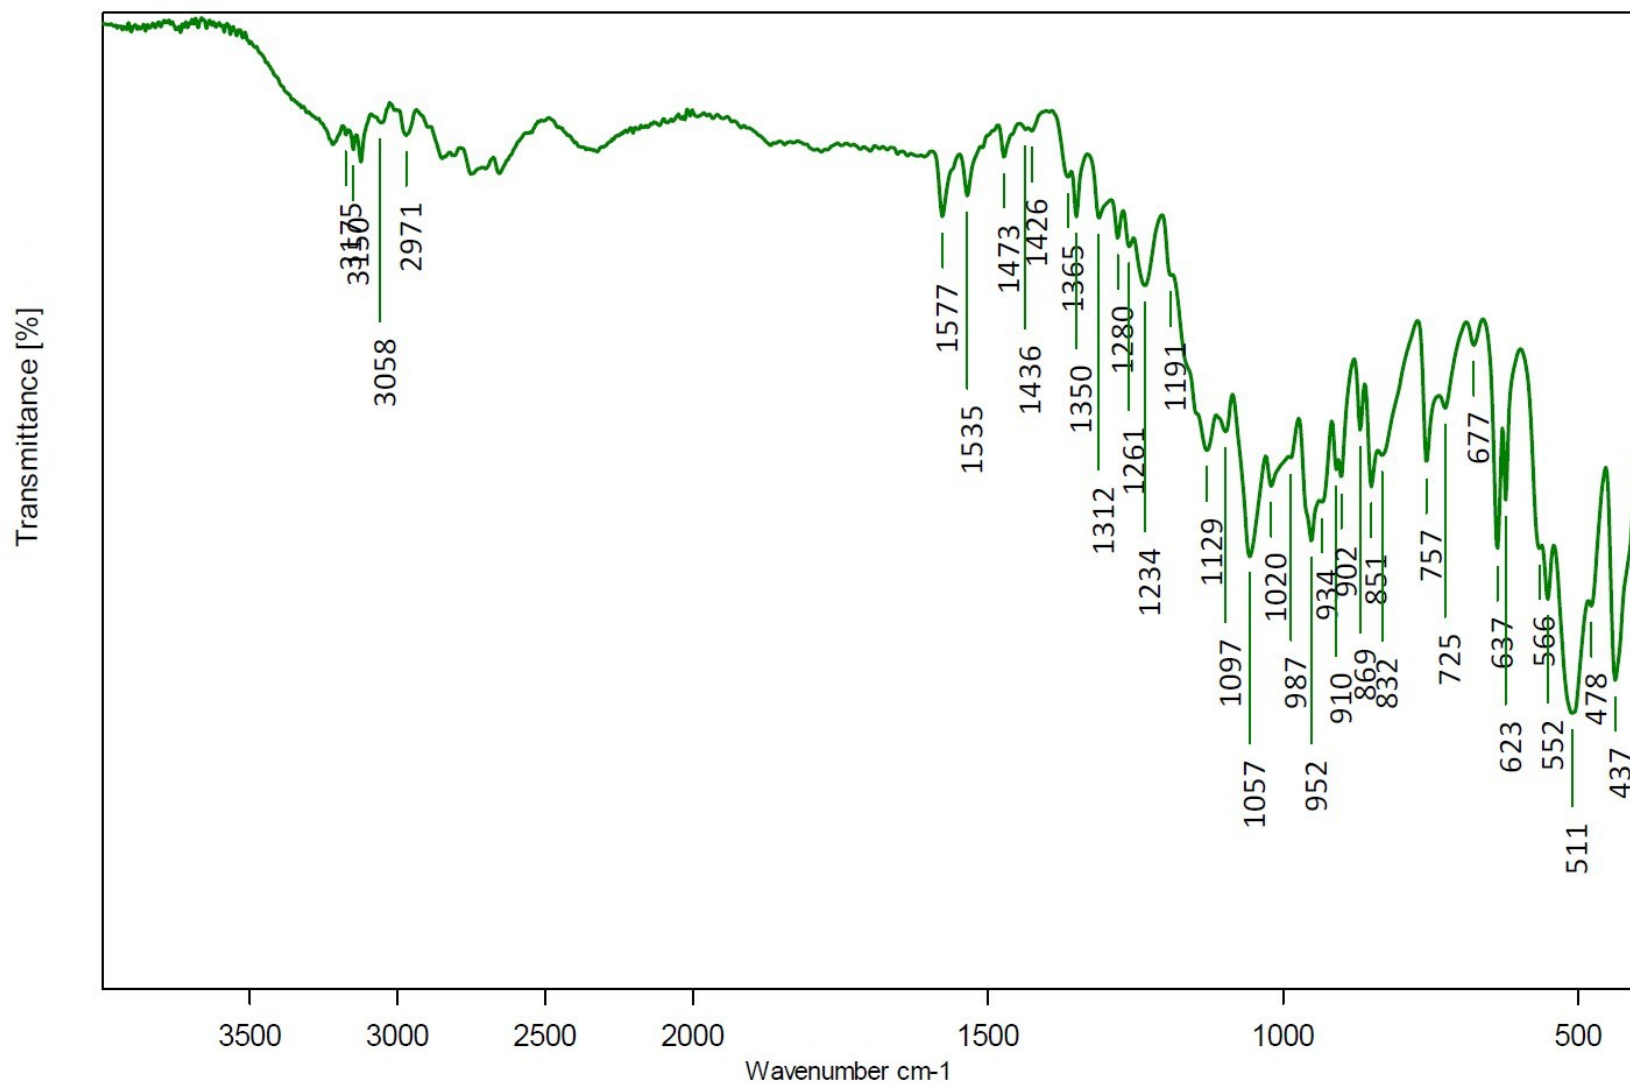

**Figure S13.** Experimental IR spectrum of ligand 3·H<sub>2</sub>O.

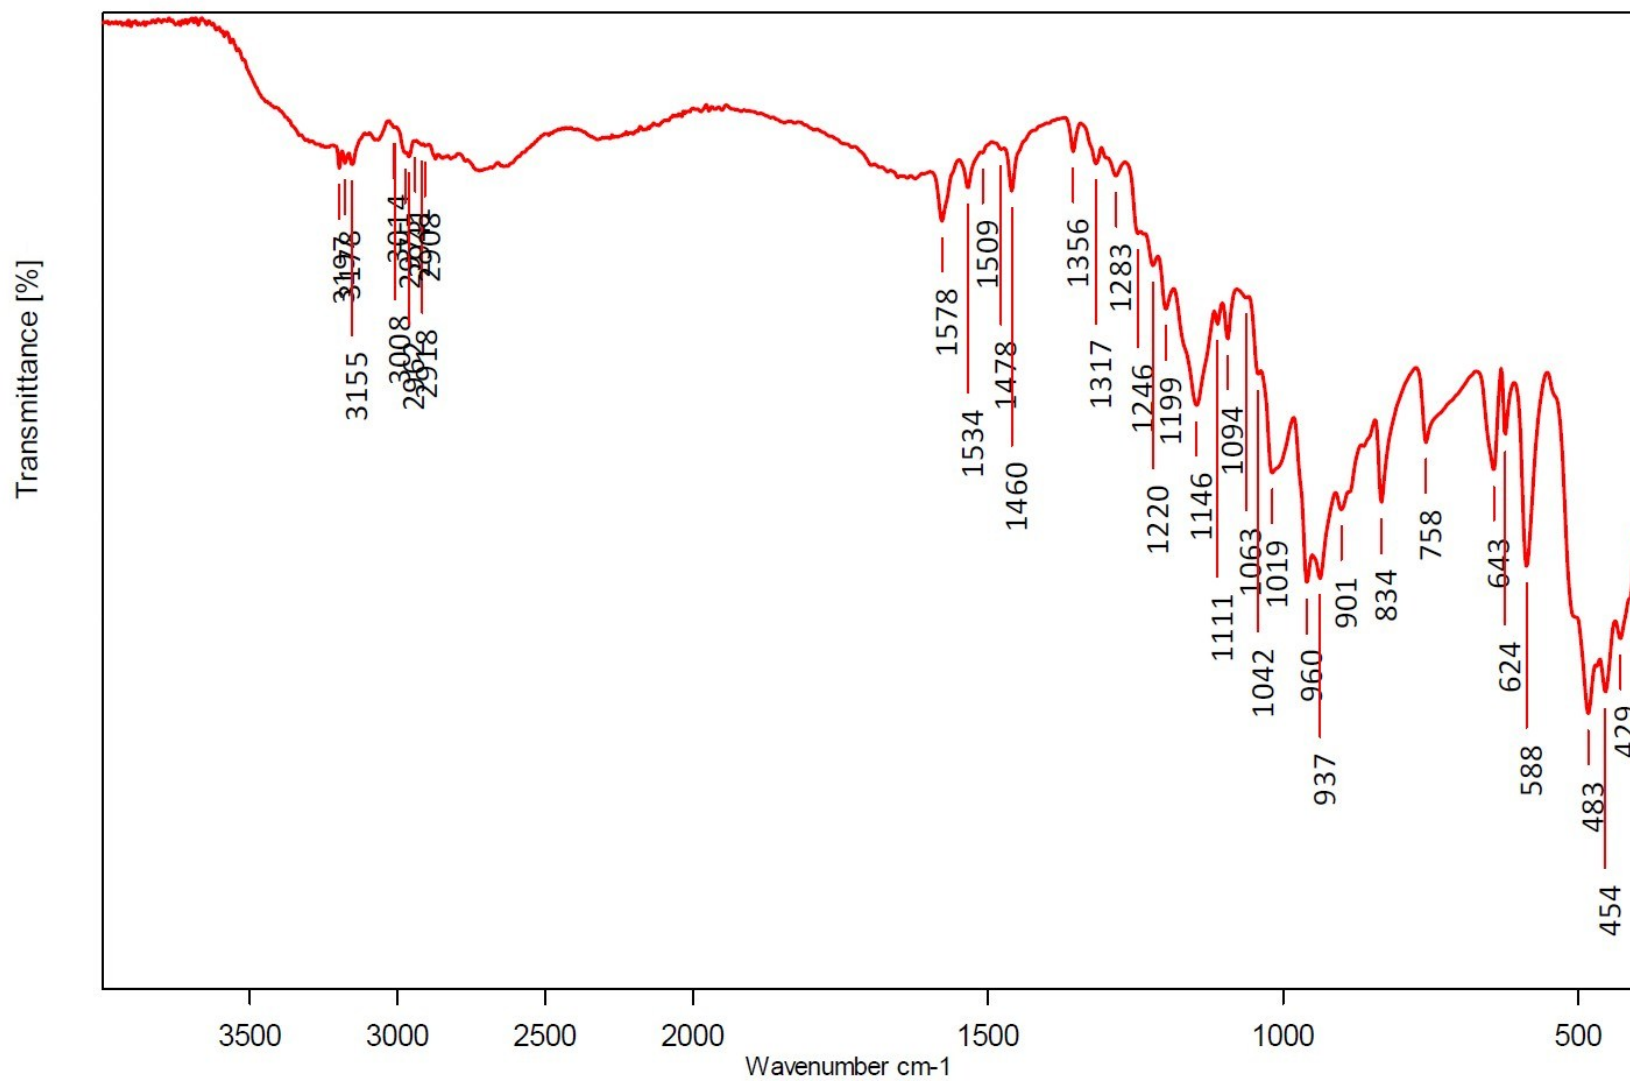

**Figure S14.** Experimental IR spectrum of ligand  $4 \cdot 4\text{H}_2\text{O}$ .

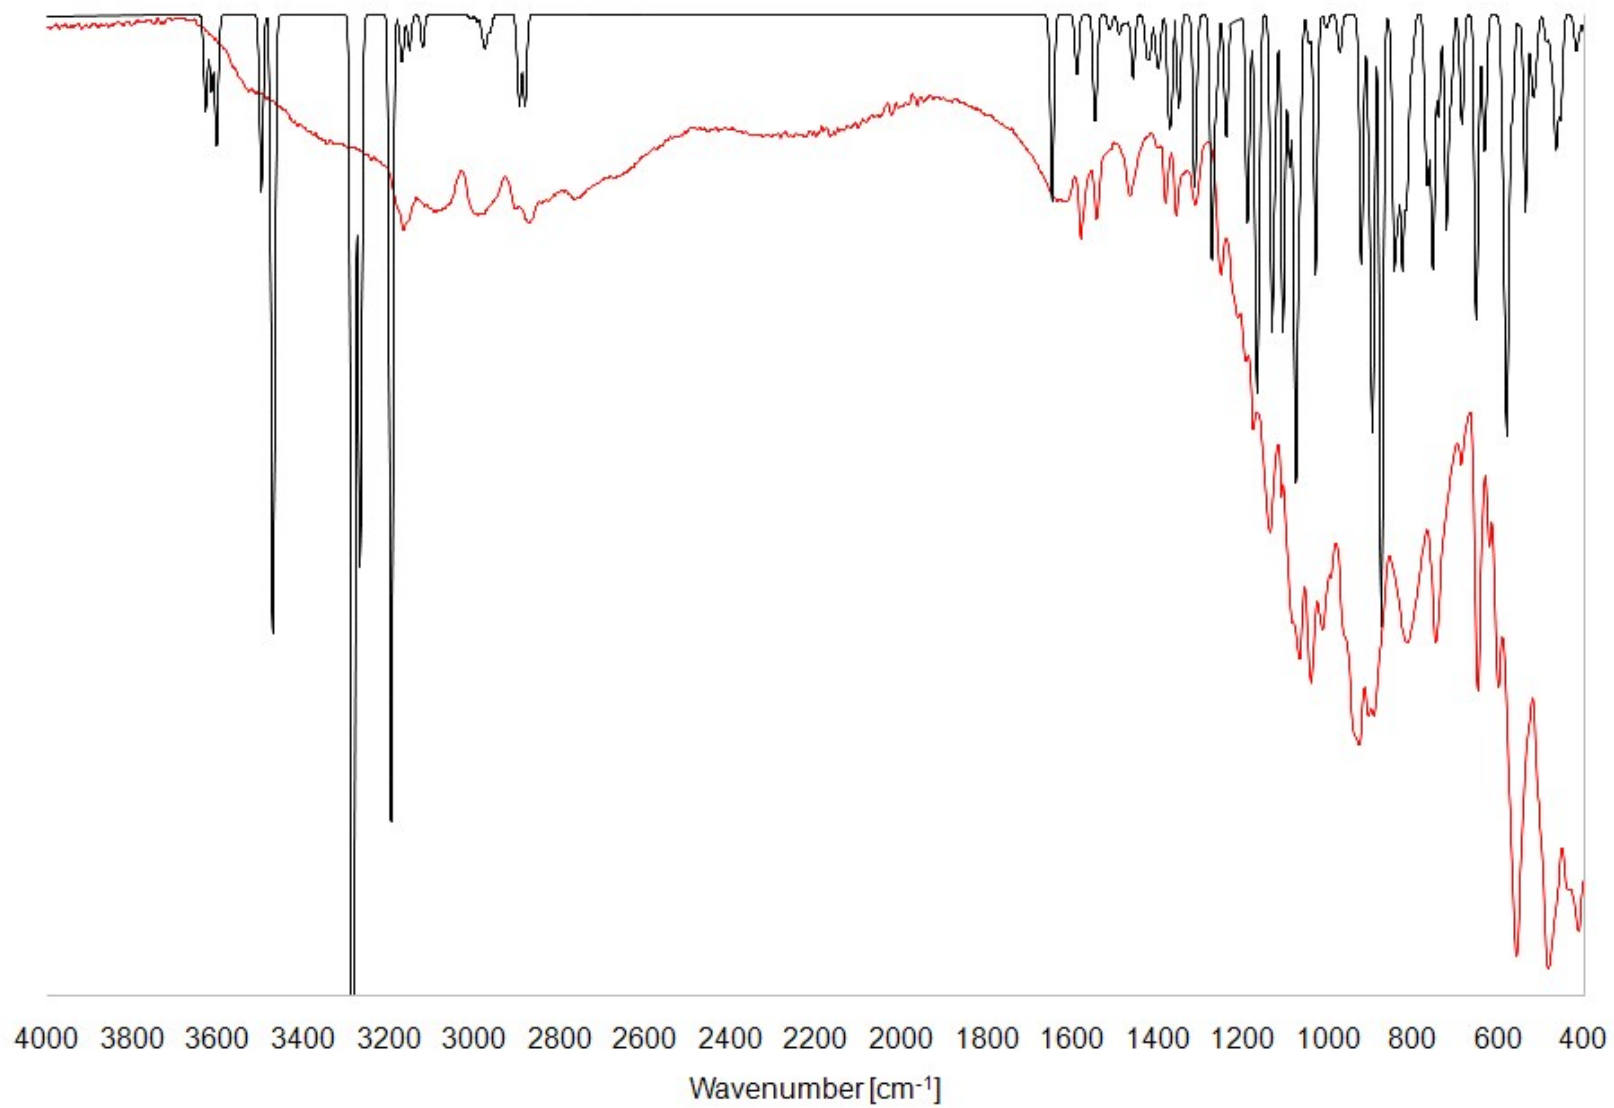

**Figure S15.** Comparison of experimental and the corresponding theoretical FT-IR spectrum (red and black line, respectively) of complex **1a**.

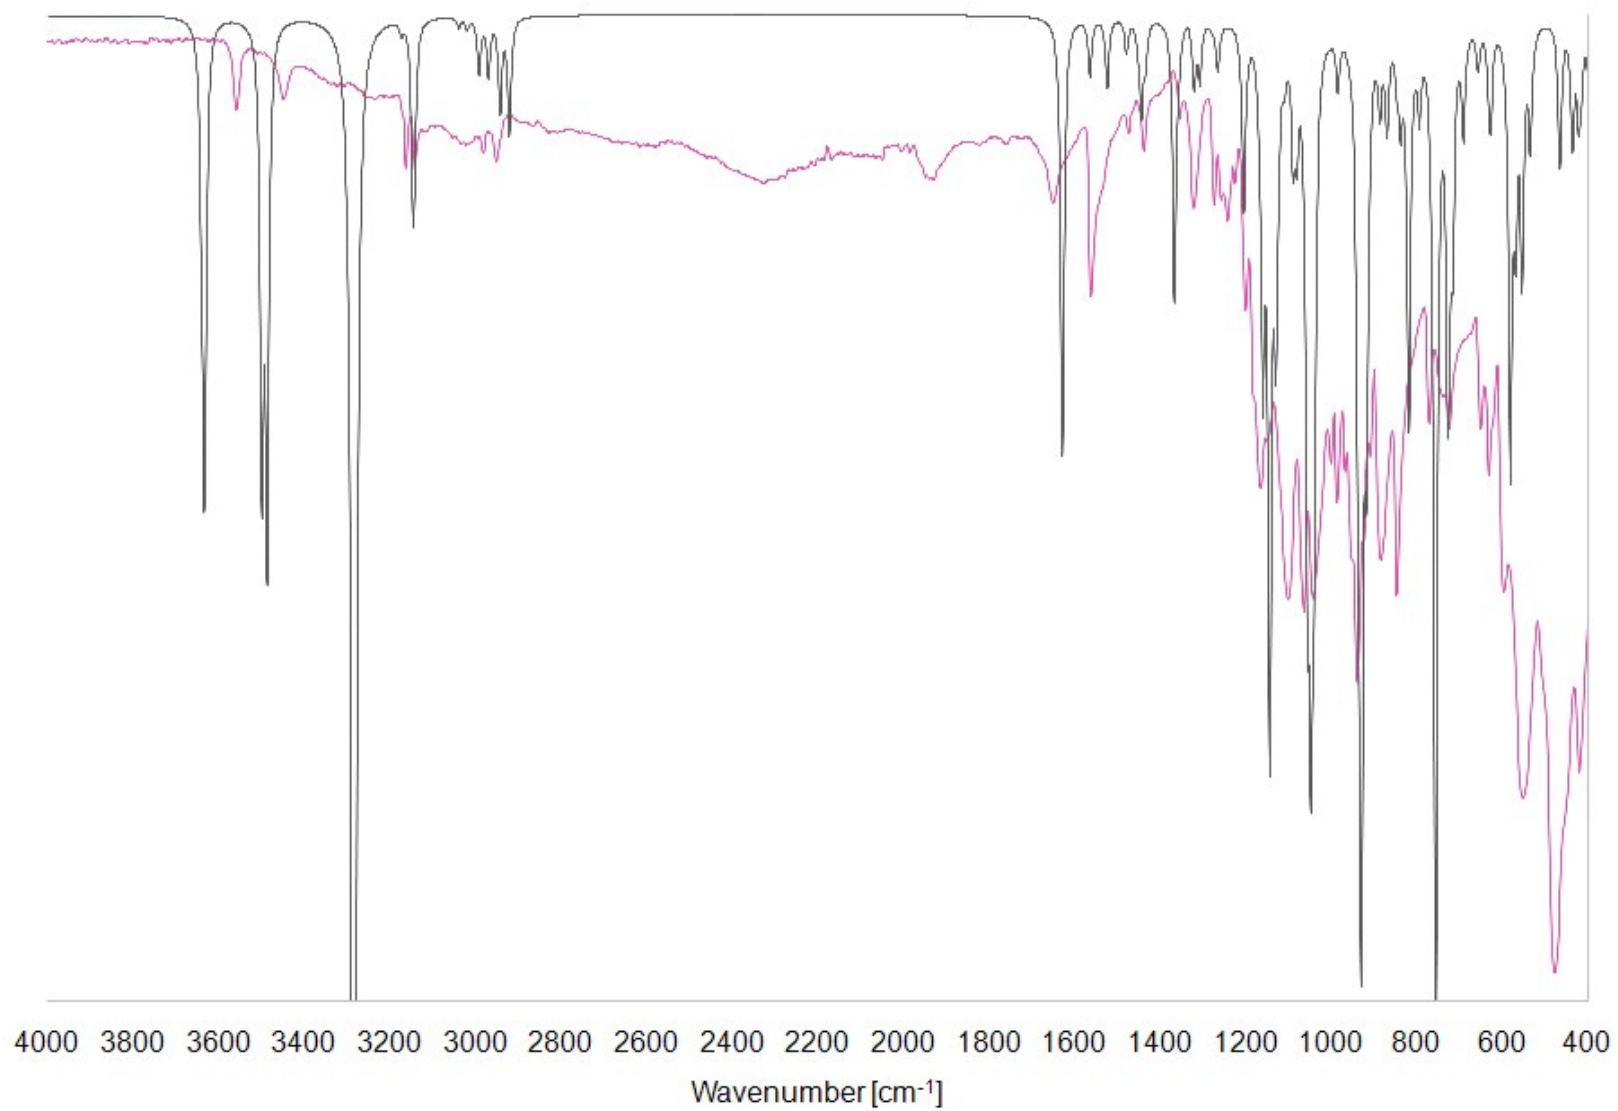

**Figure S16.** Comparison of experimental and the corresponding theoretical FT-IR spectrum (pink and black line, respectively) of complex **3a**.

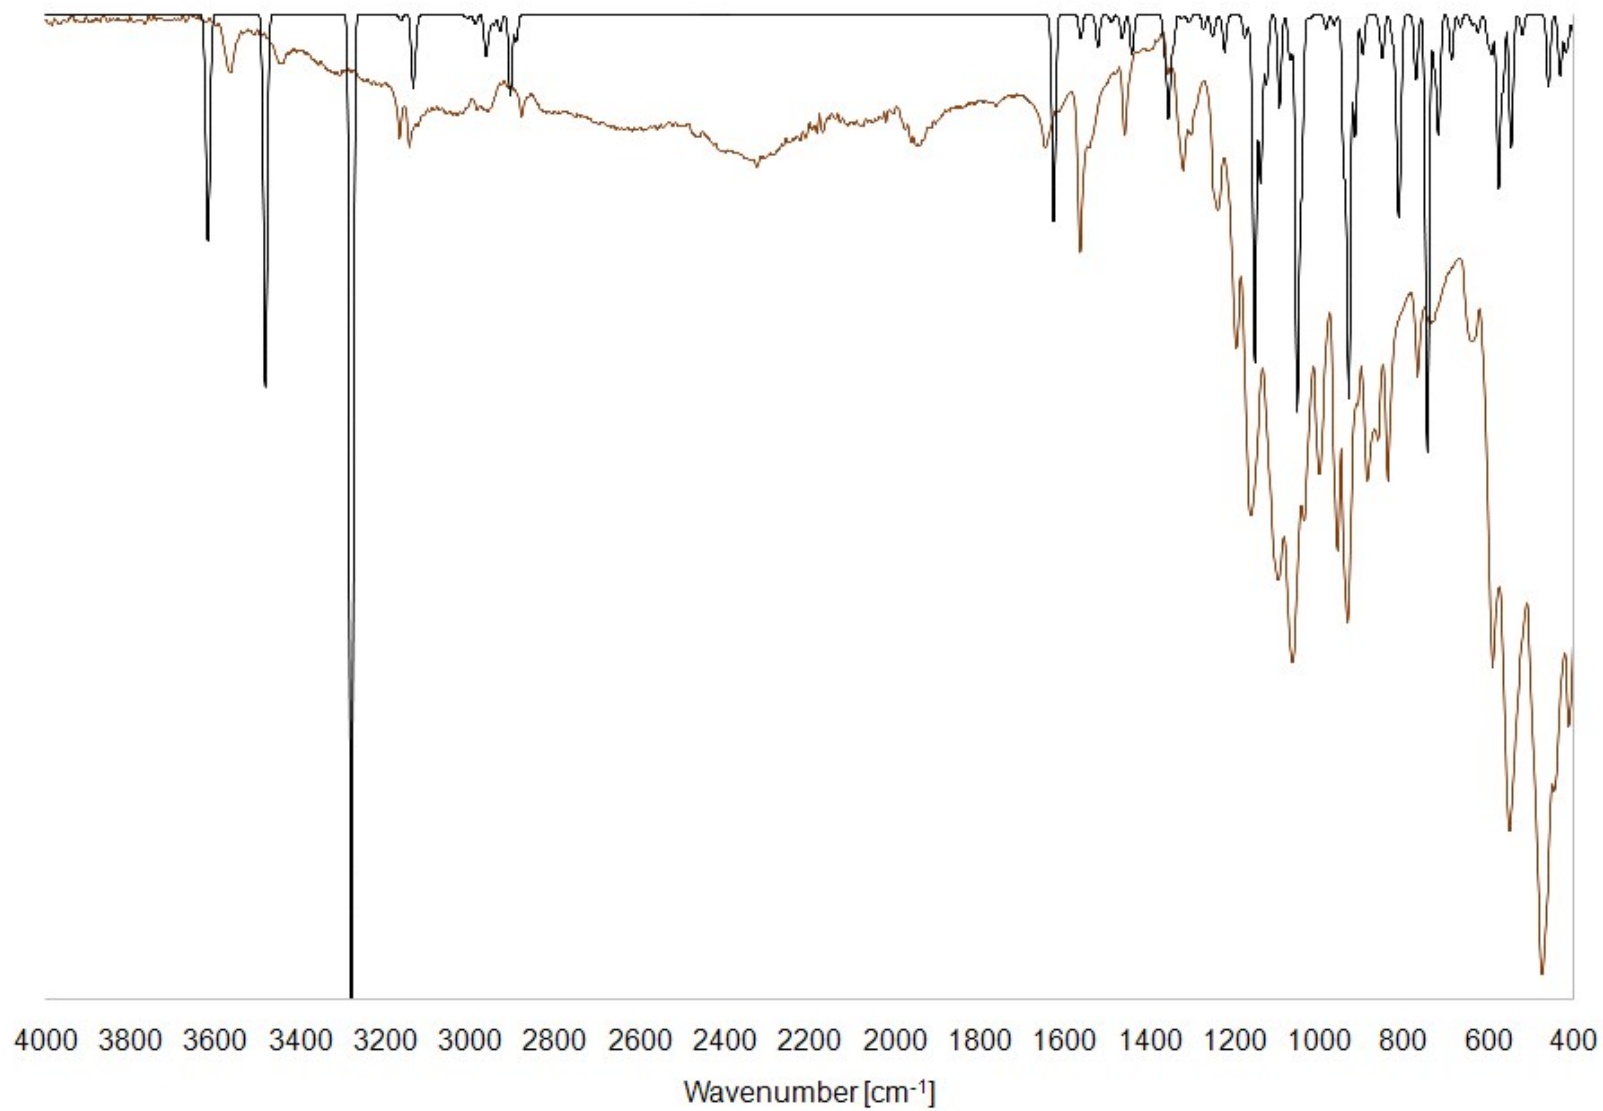

**Figure S17.** Comparison of experimental and the corresponding theoretical FT-IR spectrum (brown and black line, respectively) of complex **4a**.

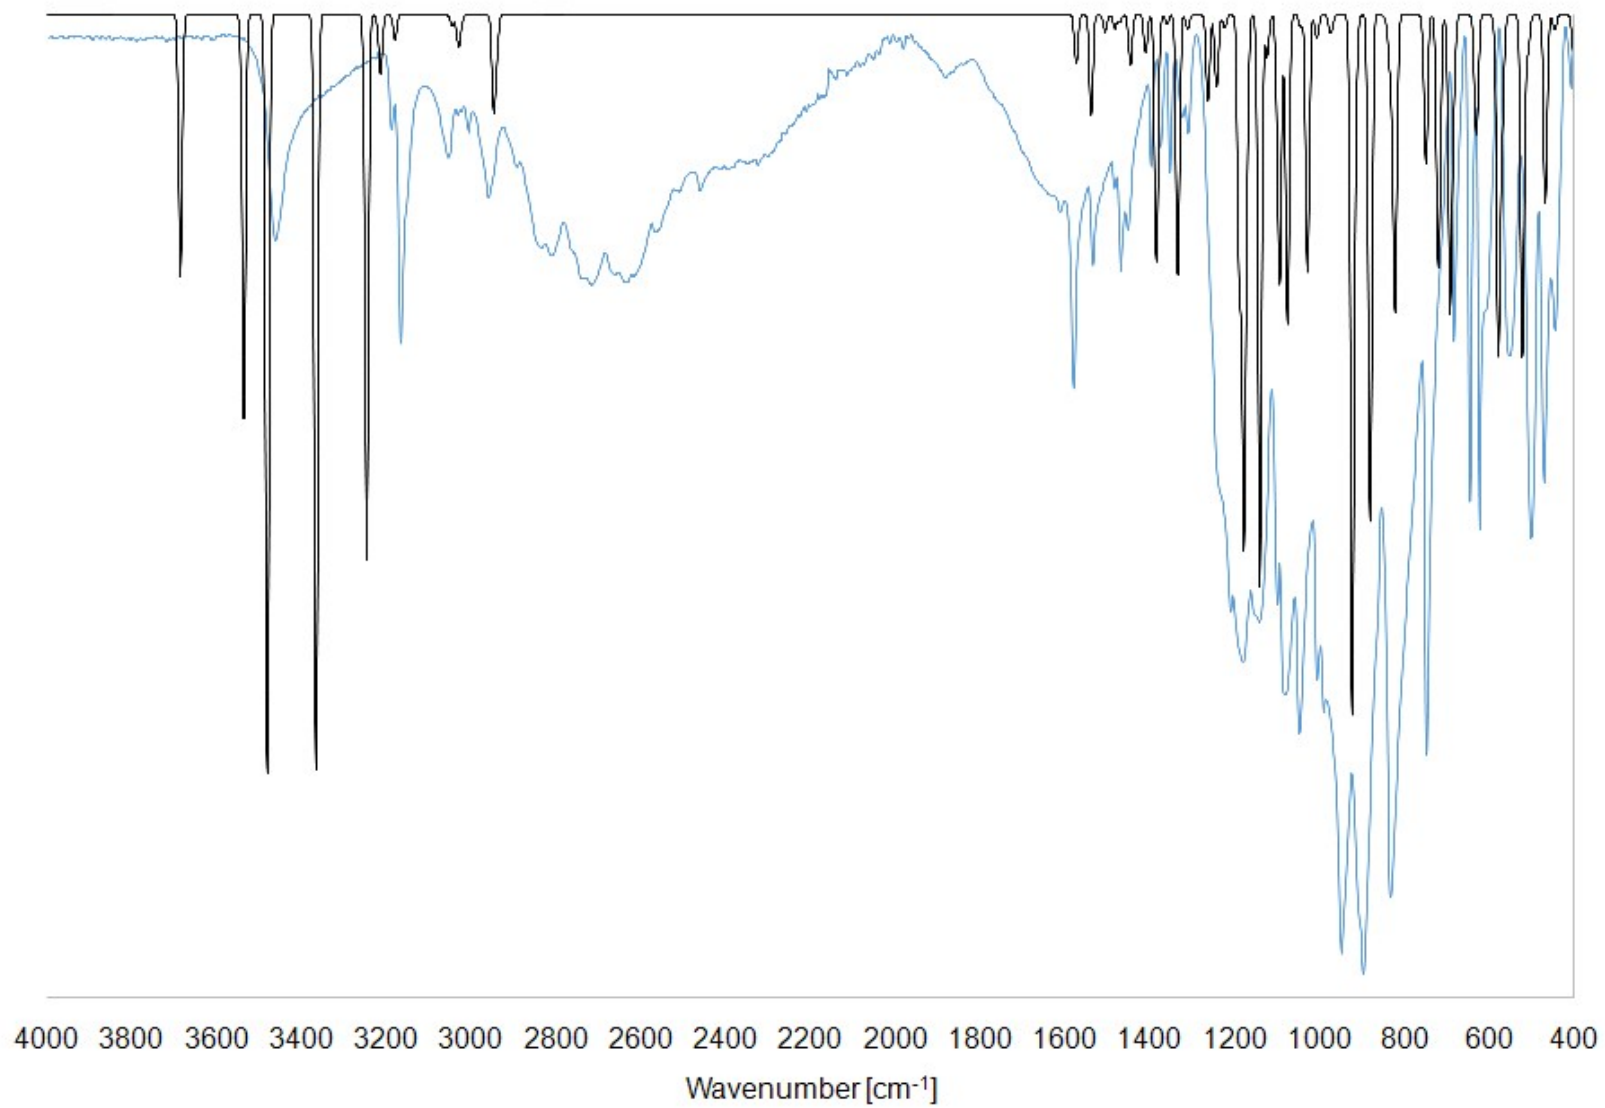

**Figure S18.** Comparison of experimental and the corresponding theoretical FT-IR spectrum (blue and black line, respectively) of ligand **1**.

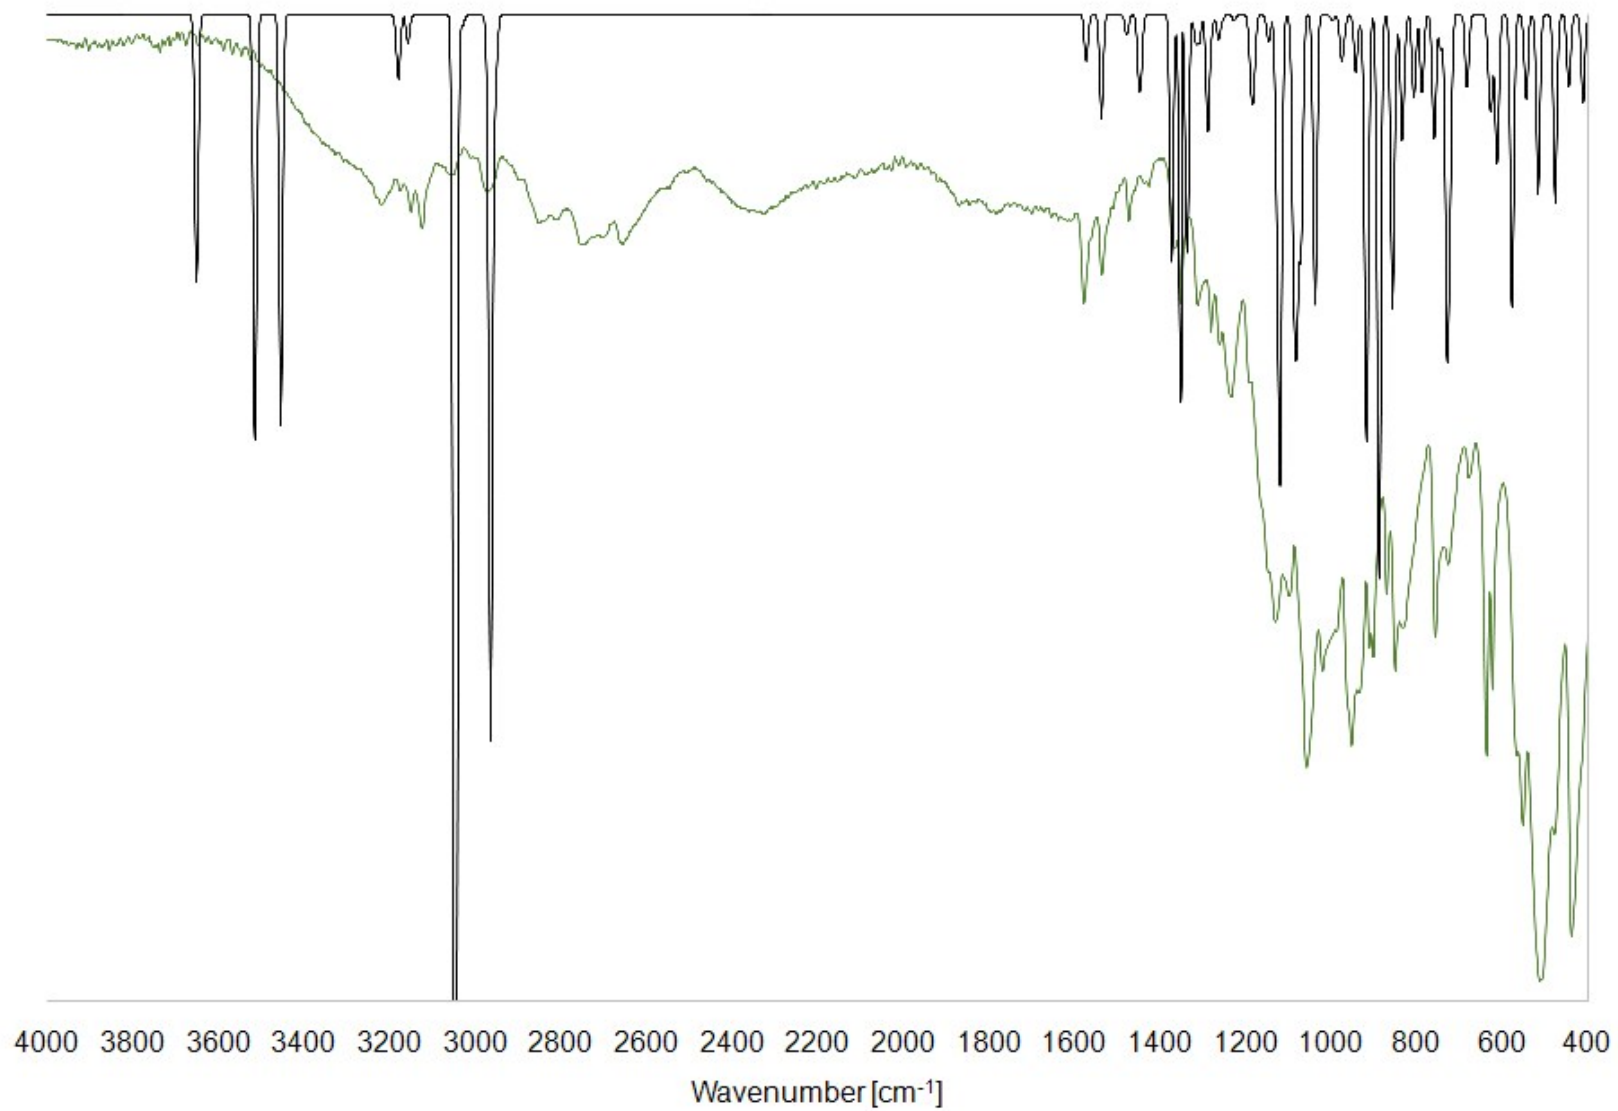

**Figure S19.** Comparison of experimental and the corresponding theoretical FT-IR spectrum (green and black line, respectively) of ligand **3**.



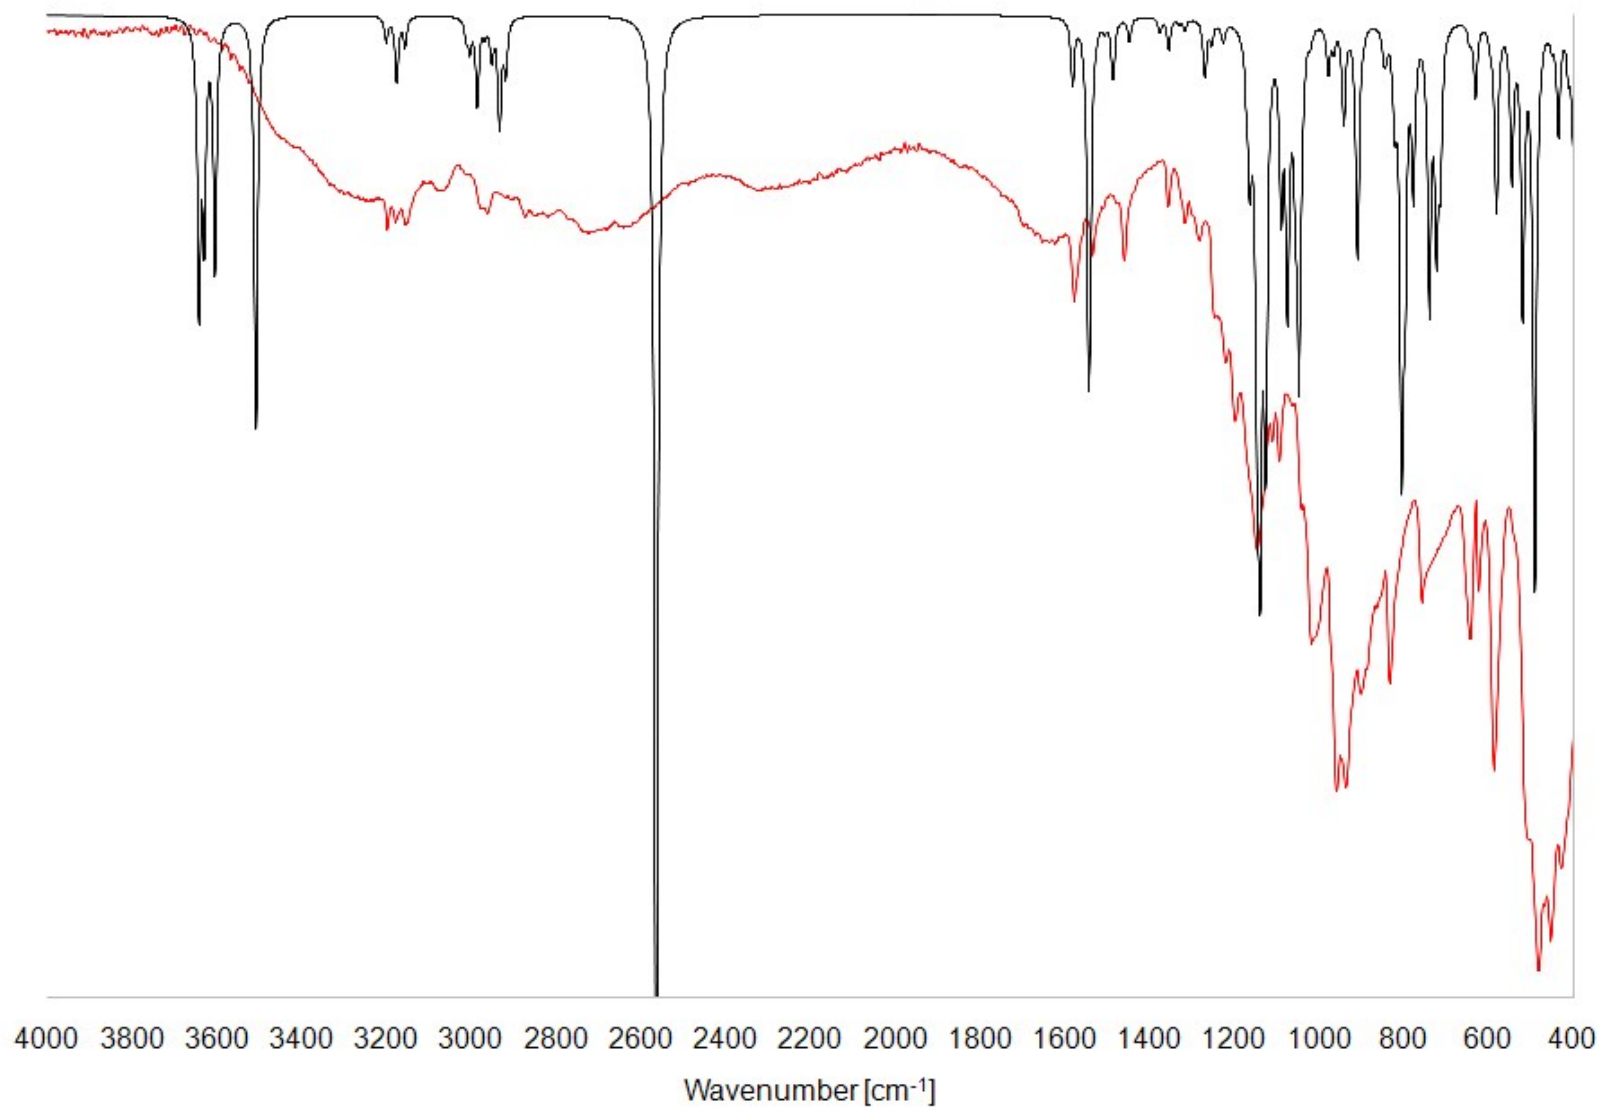

**Figure S20.** Comparison of experimental and the corresponding theoretical FT-IR spectrum (red and black line, respectively) of ligand **4**.

**Table S9.** Frequencies of theoretical and experimental IR bands and their vibrational assignments of complex **1a**.

| No. | Calcd <sup>a</sup><br>ν [cm <sup>-1</sup> ] | Exp.<br>ν [cm <sup>-1</sup> ]                  | General assignment <sup>b,c</sup> | Functional group | PED <sup>d</sup>                                                         |
|-----|---------------------------------------------|------------------------------------------------|-----------------------------------|------------------|--------------------------------------------------------------------------|
| 1.  | 3629                                        | 3650-3200 br                                   | v <sub>as</sub> (O–H)             | H <sub>2</sub> O | v(O64–H66)(62), v(O64–H65)(6)                                            |
| 2.  | 3615                                        |                                                | v(O–H)                            | phosphonate PO–H | v(O10–H11)(75)                                                           |
| 3.  | 3603                                        |                                                |                                   |                  | v(O37–H38)(100)                                                          |
| 4.  | 3499                                        |                                                | v <sub>s</sub> (O–H)              | H <sub>2</sub> O | v(O64–H65)(54), v(O64–H66)(6)                                            |
| 5.  | 3472                                        |                                                | v(N–H)                            | imidazole        | v(N15–H16)(86), v(O43–H44)(9)                                            |
| 6.  | 3469                                        |                                                |                                   |                  | v(N46–H47)(94)                                                           |
| 7.  | 3284                                        |                                                | v(O–H)                            | hydroxyl CO–H    | v(O12–H13)(58), v(O41–H42)(5)                                            |
| 8.  | 3267                                        |                                                | v(O–H)                            | phosphonate PO–H | v(O41–H42)(66), v(O12–H13)(5)                                            |
| 9.  | 3194                                        |                                                |                                   |                  | v(O6–H7)(62)                                                             |
| 10. | 3171                                        | 3165 br                                        | v(C–H)                            | imidazole        | v(C58–H59)(98)                                                           |
| 11. | 3168                                        |                                                |                                   |                  | v(C27–H28)(97)                                                           |
| 12. | 3152                                        |                                                |                                   |                  | v(C31–H32)(87), v(C29–H30)(9)                                            |
| 13. | 3151                                        | 3088 br                                        | v(C–H)                            | imidazole        | v(C62–H63)(88), v(C60–H61)(9)                                            |
| 14. | 3121                                        |                                                |                                   |                  | v(C29–H30)(89), v(C31–H32)(10)                                           |
| 15. | 3119                                        |                                                |                                   |                  | v(C60–H61)(89), v(C62–H63)(10)                                           |
| 16. | 3007                                        | 2991 br                                        | v <sub>as</sub> (C–H)             | –CH <sub>3</sub> | v(C19–H21)(70), v(C19–H22)(26)                                           |
| 17. | 2994                                        |                                                |                                   |                  | v(C23–H26)(59), v(C23–H25)(38)                                           |
| 18. | 2991                                        |                                                |                                   |                  | v(C50–H52)(50), v(C50–H51)(49)                                           |
| 19. | 2980                                        |                                                |                                   |                  | v(C19–H22)(52), v(C19–H20)(33), v(C19–H21)(13)                           |
| 20. | 2976                                        |                                                |                                   |                  | v(C50–H53)(31), v(C50–H51)(24), v(C54–H56)(19), v(C50–H52)(17)           |
| 21. | 2973                                        |                                                |                                   |                  | v(C54–H56)(46), v(C54–H57)(23), v(C50–H53)(12), v(C50–H52)(12)           |
| 22. | 2972                                        |                                                |                                   |                  | v(C23–H25)(41), v(C23–H24)(32), v(C23–H26)(25)                           |
| 23. | 2962                                        |                                                |                                   |                  | v(C54–H55)(50), v(C54–H57)(42), v(C54–H56)(7)                            |
| 24. | 2896                                        |                                                |                                   |                  | 2901                                                                     |
| 25. | 2892                                        | v(C50–H53)(54), v(C50–H51)(22), v(C50–H52)(20) |                                   |                  |                                                                          |
| 26. | 2883                                        | 2872                                           | v <sub>s</sub> (C–H)              | –CH <sub>3</sub> | v(C23–H24)(65), v(C23–H25)(17), v(C23–H26)(13)                           |
| 27. | 2880                                        |                                                |                                   |                  | v(C54–H55)(45), v(C54–H57)(26), v(C54–H56)(24)                           |
| 28. | 1647                                        | 1634, 1613 br                                  | ρ <sub>s</sub> (H <sub>2</sub> O) | H <sub>2</sub> O | ρ(H65–O64–H66)(31)                                                       |
| 29. | 1589                                        | 1579                                           | v(C=C), v(C–N), δ(im)             | imidazole        | v(C60–C62)(26), δ(H47–N46–C60)(17), δ(H47–N46–C58)(13), v(C58–N45)(9)    |
| 30. | 1588                                        |                                                |                                   |                  | δ(N14–C31–C32)(44), v(C29–C31)(19), δ(H16–N15–C29)(6), δ(N15–C29–H30)(5) |
| 31. | 1547                                        | 1542                                           | v(C=N), v(C–N), δ(im)             | imidazole        | δ(H47–N46–C60)(61), v(C58–N46)(13), v(C58–N45)(7)                        |
| 32. | 1544                                        |                                                |                                   |                  | δ(H16–N15–C29)(36), v(C27–N15)(20), v(C27–N14)(9), δ(N15–C29–H30)(8)     |

|     |      |                                       |                                                                                                                                    |                   |                                                                                                                                                                                                                                                                                       |
|-----|------|---------------------------------------|------------------------------------------------------------------------------------------------------------------------------------|-------------------|---------------------------------------------------------------------------------------------------------------------------------------------------------------------------------------------------------------------------------------------------------------------------------------|
| 33. | 1514 | 1503-1479 br                          | $\delta_{as}(\text{CH}_3)$                                                                                                         | -CH <sub>3</sub>  | $\delta(\text{H24-C23-H25})(26)$ , $\delta(\text{H25-C23-H26})(26)$ , $\delta(\text{H21-C19-H22})(13)$ , $\delta(\text{N14-C31-H32})(9)$                                                                                                                                              |
| 34. | 1510 |                                       |                                                                                                                                    |                   | $\delta(\text{H56-C54-H57})(34)$ , $\delta(\text{H51-C50-H52})(17)$ , $\delta(\text{H55-C54-H56})(9)$ , $\delta(\text{H47-N46-C60})(8)$                                                                                                                                               |
| 35. | 1489 |                                       |                                                                                                                                    |                   | $\delta(\text{H21-C19-H22})(39)$ , $\delta(\text{H24-C23-H25})(18)$ , $\delta(\text{H20-C19-H21})(11)$ , $\delta(\text{N14-C31-H32})(8)$<br>$\delta(\text{H51-C50-H52})(30)$ , $\delta(\text{H52-C50-H53})(27)$ , $\delta(\text{H56-C54-H57})(12)$ , $\delta(\text{H55-C54-H57})(8)$  |
| 36. | 1459 | 1464                                  | $\nu(\text{C=N})$ , $\nu(\text{C-N})$ , $\nu(\text{C=C})$                                                                          | imidazole         | $\nu(\text{C60-N46})(23)$ , $\nu(\text{C58-N46})(21)$ , $\nu(\text{C60-C62})(15)$ , $\delta(\text{H55-C54-H56})(5)$                                                                                                                                                                   |
| 37. | 1456 |                                       |                                                                                                                                    |                   | $\nu(\text{C27-N15})(28)$ , $\nu(\text{C29-N15})(23)$ , $\nu(\text{C29-C31})(19)$                                                                                                                                                                                                     |
| 38. | 1425 | 1427-1416 br                          | $\delta_s(\text{CH}_3)$                                                                                                            | -CH <sub>3</sub>  | $\delta(\text{C18-C23-H26})(13)$ , $\delta(\text{H24-C23-H26})(11)$ , $\delta(\text{H20-C19-H21})(9)$ , $\delta(\text{C18-C23-H25})(9)$                                                                                                                                               |
| 39. | 1417 |                                       |                                                                                                                                    |                   | $\delta(\text{H55-C54-H56})(11)$ , $\delta(\text{C49-C50-H52})(11)$ , $\delta(\text{H52-C50-H53})(11)$ , $\delta(\text{C49-C54-H56})(9)$                                                                                                                                              |
| 40. | 1403 | 1398                                  | $\delta_s(\text{CH}_3)$                                                                                                            | -CH <sub>3</sub>  | $\delta(\text{H20-C19-H22})(14)$ , $\delta(\text{C18-C19-H20})(11)$ , $\delta(\text{C18-C19-H21})(11)$ , $\delta(\text{C18-C19-H22})(9)$                                                                                                                                              |
| 41. | 1396 |                                       |                                                                                                                                    |                   | $\delta(\text{C49-C54-H56})(12)$ , $\delta(\text{C49-C50-H52})(8)$ , $\delta(\text{H55-C54-H56})(8)$ , $\delta(\text{H51-C50-H52})(7)$                                                                                                                                                |
| 42. | 1374 |                                       |                                                                                                                                    |                   | 1381                                                                                                                                                                                                                                                                                  |
| 43. | 1371 | $\nu(\text{C=N})$ , $\nu(\text{C-N})$ | $\nu(\text{C62-N45})(22)$ , $\nu(\text{C58-N45})(15)$ , $\delta(\text{H61-C60-C62})(7)$ , $\delta(\text{C60-C62-H63})(7)$          |                   |                                                                                                                                                                                                                                                                                       |
| 44. | 1350 | 1356                                  | $\delta(\text{COH})$                                                                                                               |                   | $\delta(\text{C48-O43-H44})(71)$ , $\nu(\text{C48-C49})(8)$                                                                                                                                                                                                                           |
| 45. | 1313 | 1311                                  | $\delta(\text{POH})$                                                                                                               | phosphonate P-O-H | $\delta(\text{P2-O6-H7})(24)$ , $\delta(\text{P34-O41-H42})(17)$                                                                                                                                                                                                                      |
| 46. | 1273 | 1251                                  |                                                                                                                                    |                   | $\delta(\text{P34-O41-H42})(38)$ , $\delta(\text{P2-O6-H7})(13)$                                                                                                                                                                                                                      |
| 47. | 1241 | 1211                                  | $\rho_r(\text{CH}_3)$                                                                                                              | -CH <sub>3</sub>  | $\nu(\text{C48-C49})(17)$ , $\delta(\text{C49-C50-H53})(8)$ , $\delta(\text{C49-C54-H55})(7)$ , $\nu(\text{C49-N45})(5)$                                                                                                                                                              |
| 48. | 1237 |                                       |                                                                                                                                    |                   | $\nu(\text{C17-C18})(15)$ , $\delta(\text{C18-C23-H24})(8)$ , $\delta(\text{C18-C19-H20})(6)$ , $\nu(\text{C18-C19})(5)$                                                                                                                                                              |
| 49. | 1190 | 1193                                  | $\rho_r(\text{CH}_3)$                                                                                                              | -CH <sub>3</sub>  | $\delta(\text{C49-C50-H52})(11)$ , $\delta(\text{C49-C54-H56})(11)$ , $\nu(\text{C49-N45})(5)$ , $\delta(\text{C49-C54-H57})(4)$                                                                                                                                                      |
| 50. | 1187 |                                       |                                                                                                                                    |                   | $\delta(\text{C18-C23-H26})(12)$ , $\delta(\text{C18-C19-H21})(12)$ , $\nu(\text{C31-N14})(6)$ , $\delta(\text{C18-C19-H22})(4)$                                                                                                                                                      |
| 51. | 1165 |                                       |                                                                                                                                    |                   | 1175                                                                                                                                                                                                                                                                                  |
| 52. | 1132 | 1137                                  | $\delta(\text{P33-O37-H38})(29)$ , $\nu(\text{P33-O35})(20)$ , $\delta(\text{H47-N46-C60})(18)$ , $\delta(\text{H47-N46-C58})(10)$ |                   |                                                                                                                                                                                                                                                                                       |
| 53. | 1108 | 1109                                  | $\nu(\text{C-O})$                                                                                                                  | hydroxyl C-OH     | $\nu(\text{C17-O12})(31)$ , $\delta(\text{C29-C31-H32})(11)$ , $\nu(\text{P34-O39})(6)$                                                                                                                                                                                               |
| 54. | 1106 |                                       | $\nu(\text{P=O})$                                                                                                                  | phosphonate P=O   | $\nu(\text{P34-O39})(71)$                                                                                                                                                                                                                                                             |
| 55. | 1093 | 1084                                  | $\nu(\text{C-N})$                                                                                                                  | imidazole         | $\nu(\text{C60-N46})(44)$ , $\delta(\text{N45-C62-H63})(7)$ , $\delta(\text{N46-C58-H59})(6)$ , $\delta(\text{C60-C62-H63})(5)$                                                                                                                                                       |
| 56. | 1089 |                                       |                                                                                                                                    |                   | $\nu(\text{C29-N15})(49)$ , $\delta(\text{C27-N14-C31})(12)$ , $\delta(\text{N15-C27-H28})(6)$ , $\delta(\text{N14-C27-H28})(6)$                                                                                                                                                      |
| 57. | 1078 | 1067                                  | $\nu(\text{C-O})$                                                                                                                  | hydroxyl C-OH     | $\nu(\text{C48-O43})(44)$ , $\delta(\text{H47-N46-C58})(10)$                                                                                                                                                                                                                          |
| 58. | 1076 |                                       | $\nu(\text{P=O})$                                                                                                                  | phosphonate P=O   | $\nu(\text{P2-O4})(71)$ , $\delta(\text{C29-C31-H32})(14)$ , $\delta(\text{N14-C31-H32})(11)$                                                                                                                                                                                         |
| 59. | 1030 | 1041                                  | $\nu(\text{P=O})$ , $\delta(\text{POH})$                                                                                           | phosphonate P=O   | $\nu(\text{P33-O35})(47)$ , $\delta(\text{P33-O37-H38})(28)$ , $\nu(\text{P33-O36})(5)$                                                                                                                                                                                               |
| 60. | 1004 | 1013                                  | $\delta_{\text{ring}}(\text{im})$                                                                                                  | imidazole         | $\delta(\text{H47-N46-C60})(18)$ , $\delta(\text{N46-C60-H61})(9)$ , $\delta(\text{N45-C58-N46})(8)$ , $\delta(\text{C58-N46-C60})(7)$<br>$\delta(\text{C29-C31-H32})(15)$ , $\delta(\text{C27-N14-C31})(11)$ , $\delta(\text{N15-C29-H30})(11)$ , $\delta(\text{N14-C31-C29})(7)$    |
| 61. | 975  | 994                                   | $\rho_r(\text{CH}_3)$                                                                                                              | -CH <sub>3</sub>  | $\nu(\text{C48-C49})(31)$ , $\delta(\text{C49-C54-H55})(8)$ , $\nu(\text{C49-C54})(7)$                                                                                                                                                                                                |
| 62. | 973  |                                       |                                                                                                                                    |                   | $\nu(\text{C17-C18})(22)$ , $\nu(\text{C18-C19})(12)$ , $\delta(\text{C18-C23-H25})(8)$ , $\delta(\text{C18-C23-H24})(8)$                                                                                                                                                             |
| 63. | 971  |                                       |                                                                                                                                    |                   | $\delta(\text{C18-C19-H22})(19)$ , $\nu(\text{C18-C23})(17)$ , $\delta(\text{C18-C23-H25})(7)$ , $\delta(\text{C18-C23-H26})(5)$                                                                                                                                                      |
| 64. | 969  |                                       |                                                                                                                                    |                   | $\delta(\text{C49-C50-H51})(18)$ , $\delta(\text{C49-C54-H57})(18)$ , $\nu(\text{C49-C54})(14)$ , $\nu(\text{C49-C50})(12)$                                                                                                                                                           |
| 65. | 926  | 928                                   | $\delta_{\text{ring}}(\text{im})$                                                                                                  | imidazole         | $\delta(\text{C27-N15-C29})(20)$ , $\delta(\text{H16-N15-C27})(18)$ , $\delta(\text{N15-C29-C31})(15)$ , $\delta(\text{N14-C31-C29})(14)$<br>$\delta(\text{C58-N46-C60})(28)$ , $\delta(\text{H47-N46-C58})(24)$ , $\delta(\text{H47-N46-C60})(22)$ , $\delta(\text{N46-C60-C62})(5)$ |

|     |     |        |                                 |                                     |                                                                                                                                                                                                                            |
|-----|-----|--------|---------------------------------|-------------------------------------|----------------------------------------------------------------------------------------------------------------------------------------------------------------------------------------------------------------------------|
| 66. | 906 | 907    | v(P-O)                          | phosphonate P-O                     | v(P33-O36)(17), $\delta$ (C29-C31-H32)(13), v(C17-C18)(9), v(P33-O35)(8)                                                                                                                                                   |
| 67. | 896 | 893    |                                 |                                     | v(P34-O40)(23), v(P2-O5)(10), v(P34-O41)(7)                                                                                                                                                                                |
| 68. | 876 | - br   |                                 |                                     | v(P3-O9)(20), v(P33-O36)(11), v(P2-O5)(9)                                                                                                                                                                                  |
| 69. | 837 | 815 br | v(skel)                         | skeletal vib.                       | v(C18-C19)(11), v(P2-C17)(11)                                                                                                                                                                                              |
| 70. | 827 |        |                                 |                                     | v(C49-C50)(9), v(P33-C48)(8)                                                                                                                                                                                               |
| 71. | 809 |        | $\gamma$ (im), $\tau$ (im)      | imidazole                           | $\gamma$ (H28-C27,N14,N15)(68), $\tau$ (N14-C27-N15-C29)(12), $\gamma$ (H30-C29,N15,C31)(4)<br>$\gamma$ (H59-C58,N45,N46)(64), $\tau$ (N45-C58-N46-C60)(14), $\gamma$ (H61-C60,N46,C62)(6),<br>$\tau$ (C48-C49-N45-C58)(4) |
| 73. | 771 | 749 br | v(P-O)                          | phosphonate P-OH                    | v(P34-O41)(38), v(P33-O37)(12)                                                                                                                                                                                             |
| 74. | 764 |        |                                 |                                     | v(P33-O37)(13), v(P2-O6)(12), v(P3-O10)(7)                                                                                                                                                                                 |
| 75. | 755 |        |                                 |                                     | v(P33-O37)(19), v(P34-O41)(13), v(P2-O6)(8), v(P3-O10)(5)                                                                                                                                                                  |
| 76. | 690 | 689    | $\tau$ (im), $\delta$ (skel)    | imidazole, skeletal vib.            | $\tau$ (C48-C49-N45-C58)(17), $\delta$ (N45-C62-C60-N46)(16), $\delta$ (N45-C49-C50)(12),<br>v(C49-N45)(9)                                                                                                                 |
| 77. | 687 |        |                                 |                                     | $\tau$ (C17-C18-N14-C27)(15), $\delta$ (C29-C31-H32)(14), $\delta$ (N14-C18-C19)(13),<br>$\tau$ (N14-C31-C29-N15)(11)                                                                                                      |
| 78. | 653 | 650    | $\rho_w$ (H <sub>2</sub> O)     | H <sub>2</sub> O                    | $\delta$ (O64-H65-O40)(49), $\delta$ (O64-H66-O36)(5)                                                                                                                                                                      |
| 79. | 634 | 623    | $\tau$ (im)                     | imidazole                           | $\tau$ (N45-C62-C60-N46)(57), v(C49-N45)(8), $\tau$ (C62-C60-N46-C58)(7),<br>$\tau$ (N45-C58-N46-C60)(5)                                                                                                                   |
| 80. | 633 |        |                                 |                                     | $\tau$ (N14-C31-C29-N15)(48), $\tau$ (C27-N15-C29-C31)(8), $\tau$ (N14-C27-N15-C29)(7)                                                                                                                                     |
| 81. | 583 | 602    | $\tau$ (im)                     | imidazole                           | $\tau$ (N45-C58-N46-C60)(39), $\tau$ (N45-C62-C60-N46)(17), $\tau$ (C62-C60-N46-C58)(8)                                                                                                                                    |
| 82. | 580 |        |                                 |                                     | $\tau$ (N14-C27-N15-C29)(44), $\tau$ (N14-C31-C29-N15)(18), $\tau$ (C31-C29-N15-C27)(9)                                                                                                                                    |
| 83. | 538 | 560    | $\rho_t$ (H <sub>2</sub> O)     | H <sub>2</sub> O                    | $\delta$ (O64-H66-O36)(36), $\delta$ (O64-H65-O40)(8)                                                                                                                                                                      |
| 84. | 522 |        | $\delta$ (skel), $\tau$ (skel)  | skeletal vib.                       | $\delta$ (O43-C48-C49)(7), $\delta$ (N45-C49-C48)(6), $\tau$ (N45-C49-C48-P33)(5), $\delta$ (N45-C49-C54)(4)                                                                                                               |
| 85. | 515 |        |                                 |                                     | $\delta$ (P33-C48-O49)(5), $\delta$ (N45-C49-C48)(5), $\delta$ (C50-C49-C54)(4)                                                                                                                                            |
| 86. | 467 | 486    | v(Cu-O)                         | metal-ligand vib.                   | v(Cu1-O5)(6), v(Cu1-O9)(4)                                                                                                                                                                                                 |
| 87. | 421 | 438    | $\delta$ (skel)                 | skeletal vib.                       | $\delta$ (N45-C49-C50)(5), $\delta$ (N14-C18-C19)(4)                                                                                                                                                                       |
| 88. | 419 |        | $\delta$ (skel), $\delta$ (OPO) | skeletal vib.,<br>phosphonate O-P-O | $\delta$ (N14-C18-C19)(5), $\delta$ (O12-C17-C18)(5), $\delta$ (O8-P3-O9)(5)                                                                                                                                               |
| 89. | 398 | 415    | $\delta$ (OPO), $\delta$ (skel) | phosphonate O-P-O<br>skeletal vib.  | $\delta$ (O8-P3-O10)(9), $\delta$ (C19-C18-C23)(5), $\delta$ (O12-C17-C18)(4)                                                                                                                                              |
| 90. | 396 |        |                                 |                                     | $\delta$ (C19-C18-C23)(11), $\delta$ (O39-P34-O41)(7), $\delta$ (C17-C18-C19)(5)                                                                                                                                           |

<sup>a</sup>Scaling factors for the calculated harmonic frequencies: 0.943 for modes 1-27, 0.978 for modes 28-43, 1.000 for modes 44-90. <sup>b</sup>Abbreviations: br – broad, v – stretching,  $\delta$  – in-plane bending,  $\rho_r$  – rocking,  $\rho_s$  – scissoring,  $\rho_w$  – wagging,  $\rho_t$  – twisting,  $\gamma$  – out-of-plane bending,  $\tau$  – torsion. Subscripts: as – antisymmetric; s – symmetric. <sup>c</sup>Vibrational bands assignment for the most characteristic functional groups based on the significant contribution in the potential energy distribution. <sup>d</sup>The PED values are listed if a contributor is among the top four and is  $\geq 4\%$ .

**Table S10.** Frequencies of theoretical and experimental IR bands and their vibrational assignments of complex **3a**.

| No. | Calcd <sup>a</sup><br>ν [cm <sup>-1</sup> ] | Exp.<br>ν [cm <sup>-1</sup> ] | General assignment <sup>b,c</sup>         | Functional group              | PED <sup>d</sup>                                                    |
|-----|---------------------------------------------|-------------------------------|-------------------------------------------|-------------------------------|---------------------------------------------------------------------|
| 1.  | 3639                                        | 3558                          | v <sub>as</sub> (O–H)                     | H <sub>2</sub> O              | v(O34–H35)(43)                                                      |
| 2.  | 3634                                        |                               | v(O–H)                                    | phosphonate PO–H              | v(O6–H7)(56)                                                        |
| 3.  | 3630                                        |                               | v(O10–H11)(54)                            |                               |                                                                     |
| 4.  | 3498                                        | 3448                          | v(N–H)                                    | imidazole                     | v(N15–H16)(60)                                                      |
| 5.  | 3486                                        |                               | v <sub>s</sub> (O–H)                      | H <sub>2</sub> O              | v(O34–H36)(34)                                                      |
| 6.  | 3283                                        | 3420-3180 br                  | v(O–H)                                    | hydroxyl CO–H                 | v(O12–H13)(35)                                                      |
| 7.  | 3172                                        | 3161                          | v(C–H)                                    | imidazole                     | v(C32–H33)(52), v(C30–H31)(6)                                       |
| 8.  | 3145                                        | 3141                          |                                           |                               | v(C28–H29)(67)                                                      |
| 9.  | 3140                                        |                               |                                           |                               | v(C30–H31)(43), v(C32–H33)(4)                                       |
| 10. | 3038                                        | 3050-3000 br                  | v <sub>as</sub> (C–H)                     | –CH <sub>2</sub> –            | v(C19–H20)(47), v(C19–H21)(11)                                      |
| 11. | 3019                                        |                               |                                           |                               | v(C25–H26)(49), v(C25–H27)(20)                                      |
| 12. | 2991                                        |                               |                                           |                               | v(C22–H23)(59), v(C22–H24)(12)                                      |
| 13. | 2969                                        | 2981                          | v <sub>s</sub> (C–H)                      | –CH <sub>2</sub> –            | v(C19–H21)(63), v(C19–H20)(15)                                      |
| 14. | 2941                                        | 2950                          |                                           |                               | v(C25–H27)(36), v(C25–H26)(15)                                      |
| 15. | 2919                                        | 2930-2920 br                  |                                           |                               | v(C22–H24)(44), v(C22–H23)(9)                                       |
| 16. | 1627                                        | 1649 br                       | ρ <sub>s</sub> (H <sub>2</sub> O)         | H <sub>2</sub> O              | δ(H35–O34–H36)(12)                                                  |
| 17. | 1563                                        | 1560 br                       | v(C=C), δ(im)                             | imidazole                     | δ(H16–N15–C30)(26), v(C30–C32)(15)                                  |
| 18. | 1523                                        |                               | v(C=N), v(C–N)                            | imidazole                     | v(C28–N15)(21), v(C28–N14)(13)                                      |
| 19. | 1478                                        | 1473                          | ρ <sub>s</sub> (CH <sub>2</sub> )         | –CH <sub>2</sub> –            | δ(H20–C19–H21)(16), δ(H23–C22–H24)(9)                               |
| 20. | 1443                                        | 1437                          | v(C–N), v(C=C), v(C=N)                    | imidazole                     | v(C30–N15)(12), v(C30–C32)(8), v(C28–N15)(7), v(C28–N14)(4)         |
| 21. | 1433                                        |                               | ρ <sub>s</sub> (CH <sub>2</sub> )         | –CH <sub>2</sub> –            | δ(H26–C25–H27)(24), δ(C18–C25–H26)(5)                               |
| 22. | 1366                                        | 1354                          | δ(COH)                                    | hydroxyl C–O–H                | δ(C17–O12–H13)(28)                                                  |
| 23. | 1355                                        |                               | v(C–N)                                    | imidazole                     | v(C32–N14)(13), v(C28–N14)(11)                                      |
| 24. | 1320                                        | 1321                          | ρ <sub>w</sub> (CH <sub>2</sub> )         | –CH <sub>2</sub> –            | δ(C18–C25–H26)(6), δ(C18–C19–H20)(6), δ(C22–C19–H20)(6)             |
| 25. | 1307                                        |                               | δ(im)                                     | imidazole                     | δ(C28–N15–H16)(17), δ(C30–N15–H16)(16)                              |
| 26. | 1266                                        | 1272                          | ρ <sub>w</sub> (CH <sub>2</sub> )         | –CH <sub>2</sub> –            | v(C18–N14)(7), δ(C18–C25–H27)(5), δ(C22–C25–H27)(5)                 |
| 27. | 1262                                        | 1257                          |                                           |                               | δ(H23–C22–C25)(6), δ(C19–C22–H23)(5)                                |
| 28. | 1243                                        | 1242                          | v(C–N), ρ <sub>t</sub> (CH <sub>2</sub> ) | imidazole, –CH <sub>2</sub> – | v(C32–N14)(11), δ(C22–C25–H27)(7), v(C28–N15)(5), δ(C18–C25–H27)(5) |
| 29. | n.o.                                        | 1224                          | -                                         | -                             | n.o.                                                                |
| 30. | 1204                                        | 1199                          | v(skel)                                   | skeletal vib.                 | v(C17–C18)(21)                                                      |
| 31. | 1159                                        | 1165                          | v(P=O), δ(POH)                            | phosphonate P=O               | v(P2–O4)(5), δ(P2–O6–H7)(4)                                         |
| 32. | 1143                                        | 1149                          |                                           |                               | v(P2–O4)(13), δ(P2–O6–H7)(12)                                       |
| 33. | 1089                                        | 1100                          | v(C–O), v(C–N)                            | hydroxyl C–OH,<br>imidazole   | v(C17–O12)(9), v(C30–N15)(8)                                        |

|     |      |      |                                                                        |                          |                                                                             |
|-----|------|------|------------------------------------------------------------------------|--------------------------|-----------------------------------------------------------------------------|
| 34. | 1055 | 1063 | v(P=O), $\delta$ (POH)                                                 | phosphonate P=O          | v(P3–O8)(11), $\delta$ (P3–O10–H11)(7)                                      |
| 35. | 1040 | 1042 |                                                                        |                          | $\delta$ (P2–O6–H7)(23), v(P2–O4)(16)                                       |
| 36. | 1003 | 1000 | $\delta_{\text{ring}}(\text{im})$ , v(skel)                            | imidazole, skeletal vib. | $\delta$ (H16–N15–C30)(17), v(C18–N14)(4), v(C17–C18)(4)                    |
| 37. | 984  | 986  | $\delta_{\text{ring}}(\text{im})$ , $\delta_{\text{ring}}(\text{cbt})$ | imidazole, cyclobutane   | $\delta$ (H16–N15–C30)(10), v(C22–C25)(6), v(C19–C22)(6), v(C17–C18)(5)     |
| 38. | 957  | 967  | v(P=O)                                                                 | phosphonate P=O          | v(P3–O8)(8), v(P2–O4)(6)                                                    |
| 39. | 929  | 938  | v(P–O)                                                                 | phosphonate P–O          | v(P3–O9)(17), v(P3–O8)(8)                                                   |
| 40. | 917  | 909  |                                                                        |                          | v(P2–O5)(7)                                                                 |
| 41. | 886  | 884  | $\gamma(\text{im})$                                                    | imidazole                | $\gamma$ (H33–C32,N14,C30)(6), $\delta$ (C17–C18–N14)(4)                    |
| 42. | 869  |      |                                                                        |                          | $\gamma$ (H33–C32,N14,C30)(49)                                              |
| 43. | 838  | 846  |                                                                        |                          | $\gamma$ (H33–C32,N14,C30)(12), $\gamma$ (H31–C30,N15,C32)(6), v(C17–P2)(4) |
| 44. | 756  | 770  | v(P–O)                                                                 | phosphonate P–OH         | v(P2–O6)(14), v(P3–O10)(7)                                                  |
| 45. | 729  | 723  |                                                                        |                          | v(P3–O10)(23)                                                               |
| 46. | 656  | 650  | $\tau(\text{im})$                                                      | imidazole                | $\tau$ (C18–N14–C32–C30)(17), $\tau$ (C17–C18–N14–C28)(10)                  |
| 47. | 630  | 630  |                                                                        |                          | v(C18–N14)(10), $\tau$ (N14–C28–N15–C30)(5)                                 |
| 48. | 581  | 596  | $\rho_w(\text{H}_2\text{O})$                                           | H <sub>2</sub> O         | $\delta$ (O34–H35–O40)(21)                                                  |
| 49. | 554  | 552  | v(Cu–O)                                                                | metal-ligand vib.        | v(Cu1–O5)(4)                                                                |
| 50. | 535  |      |                                                                        |                          | $\delta$ (O12–C17–C18)(4), v(Cu1–O9)(3)                                     |
| 51. | 465  | 478  | $\tau(\text{skel})$                                                    | skeletal vib.            | $\tau$ (C25–C22–C19–C18)(5)                                                 |
| 52. | 436  | 420  | $\delta(\text{OPO})$                                                   | phosphonate O–P–O        | $\delta$ (O8–P3–O9)(10), $\delta$ (O9–P3–O10)(4)                            |
| 53. | 422  |      |                                                                        |                          | $\delta$ (O8–P3–O10)(7)                                                     |

<sup>a</sup>Scaling factors for the calculated harmonic frequencies: 0.950 for modes 1-15, 0.975 for modes 16-23, 1.000 for modes 24-53. <sup>b</sup>Abbreviations: br – broad, v – stretching,  $\delta$  – in-plane bending,  $\delta_{\text{ring}}(\text{cbt})$  – cyclobutane ring breaching,  $\rho_r$  – rocking,  $\rho_s$  – scissoring,  $\rho_w$  – wagging,  $\rho_t$  – twisting,  $\gamma$  – out-of-plane bending,  $\tau$  – torsion. Subscripts: as – antisymmetric; s – symmetric. <sup>c</sup>Vibrational bands assignment for the most characteristic functional groups based on the significant contribution in the potential energy distribution. <sup>d</sup>The PED values are listed if a contributor is among the top four and is  $\geq 4\%$  (except vib. no. 50).

**Table S11.** Frequencies of theoretical and experimental IR bands and their vibrational assignments of complex **4a**.

| No. | Calcd <sup>a</sup><br>ν [cm <sup>-1</sup> ] | Exp.<br>ν [cm <sup>-1</sup> ] | General assignment <sup>b,c</sup>         | Functional group                              | PED <sup>d</sup>                                                             |
|-----|---------------------------------------------|-------------------------------|-------------------------------------------|-----------------------------------------------|------------------------------------------------------------------------------|
| 1.  | 3618                                        | 3564                          | ν(O–H), ν <sub>as</sub> (O–H)             | phosphonate PO–H,<br>H <sub>2</sub> O         | ν(O6–H7)(38), ν(O37–H38)(8)                                                  |
| 2.  | 3614                                        |                               |                                           |                                               |                                                                              |
| 3.  | 3483                                        | 3448                          | ν(N–H)                                    | imidazole                                     | ν(N15–H16)(98)                                                               |
| 4.  | 3478                                        |                               |                                           |                                               |                                                                              |
| 5.  | 3274                                        | 3420-3200 br                  | ν(O–H)                                    | hydroxyl CO–H                                 | ν(O12–H13)(45)                                                               |
| 6.  | 3162                                        | 3165                          | ν(C–H)                                    | imidazole                                     | ν(C35–H36)(67), ν(C33–H34)(6)                                                |
| 7.  | 3134                                        | 3142                          |                                           |                                               | ν(C31–H32)(68)                                                               |
| 8.  | 3127                                        |                               |                                           |                                               | ν(C33–H34)(76), ν(C35–H36)(6)                                                |
| 9.  | 3005                                        | 3029                          | ν <sub>as</sub> (C–H)                     | –CH <sub>2</sub> –                            | ν(C19–H20)(53), ν(C19–H21)(39)                                               |
| 10. | 2987                                        | 2950-2940 br                  |                                           |                                               | ν(C28–H30)(51), ν(C28–H29)(37)                                               |
| 11. | 2962                                        |                               | 2957                                      | ν(C25–H27)(31), ν(C22–H23)(27), ν(C25–H26)(6) |                                                                              |
| 12. | 2954                                        | 2950-2940 br                  | ν <sub>s</sub> (C–H)                      | –CH <sub>2</sub> –                            | ν(C19–H21)(49), ν(C19–H20)(39), ν(C25–H27)(7)                                |
| 13. | 2944                                        |                               | ν <sub>as</sub> (C–H)                     |                                               | ν(C22–H23)(45), ν(C25–H27)(34), ν(C22–H24)(10)                               |
| 14. | 2929                                        | 2925                          | ν <sub>s</sub> (C–H)                      | –CH <sub>2</sub> –                            | ν(C28–H29)(31), ν(C28–H30)(20)                                               |
| 15. | 2904                                        | 2910                          |                                           |                                               | ν(C22–H24)(36), ν(C25–H26)(15), ν(C22–H23)(10)                               |
| 16. | 2891                                        | 2878                          |                                           |                                               | ν(C25–H26)(61), ν(C22–H24)(25), ν(C25–H27)(9)                                |
| 17. | 1625                                        | 1645                          | ρ <sub>s</sub> (H <sub>2</sub> O)         | H <sub>2</sub> O                              | δ(H38–O37–H39)(15)                                                           |
| 18. | 1562                                        | 1563 br                       | δ(im), ν(C=C)                             | imidazole                                     | δ(H16–N15–C33)(40), ν(C33–C35)(28), δ(H16–N15–C31)(24)                       |
| 19. | 1520                                        |                               | ν(C–N), ν(C=N), δ(im)                     |                                               | ν(C31–N15)(29), ν(C31–N14)(18), δ(H16–N15–C33)(15), δ(N15–C33–H34)(4)        |
| 20. | 1490                                        | 1459                          | ρ <sub>s</sub> (CH <sub>2</sub> )         | –CH <sub>2</sub> –                            | δ(H20–C19–H21)(17), δ(H23–C22–H24)(9), δ(H29–C28–H30)(7)                     |
| 21. | 1469                                        |                               |                                           |                                               | δ(H23–C22–H24)(17), δ(H20–C19–H21)(13), δ(H26–C25–H27)(13)                   |
| 22. | 1463                                        |                               |                                           |                                               | δ(H29–C28–H30)(22), δ(H20–C19–H21)(7)                                        |
| 23. | 1450                                        |                               |                                           |                                               | δ(H26–C25–H27)(33), δ(H23–C22–H24)(17), δ(H29–C28–H30)(6), δ(H20–C19–H21)(5) |
| 24. | 1441                                        |                               | ν(C–N), ν(C=C), ν(C=N)                    | imidazole                                     | ν(C33–N15)(13), ν(C33–C35)(10), ν(C31–N15)(9), ν(C31–N14)(5)                 |
| 25. | 1364                                        | 1356                          | ν(C–N), ρ <sub>w</sub> (CH <sub>2</sub> ) | imidazole, –CH <sub>2</sub> –                 | ν(C35–N14)(14), δ(C18–C19–H20)(14), δ(H20–C19–C22)(13), ν(C31–N14)(11)       |
| 26. | 1354                                        |                               | δ(COH)                                    | hydroxyl C–O–H                                | δ(C17–O12–H13)(27)                                                           |
| 27. | 1325                                        | 1321                          | ρ <sub>w</sub> (CH <sub>2</sub> )         | –CH <sub>2</sub> –                            | δ(C25–C28–H30)(6), δ(C18–C28–H30)(6), δ(C19–C22–H24)(5), δ(C22–C25–H26)(5)   |
| 28. | 1307                                        | 1303                          | δ(im)                                     | imidazole                                     | δ(H16–N15–C33)(32), δ(H16–N15–C31)(32)                                       |
| 29. | 1272                                        | 1239                          | ρ <sub>w</sub> (CH <sub>2</sub> )         | –CH <sub>2</sub> –                            | δ(C18–C19–H21)(14), δ(H23–C22–C25)(11), δ(C22–C25–H26)(9), δ(C19–C22–H23)(7) |
| 30. | 1252                                        |                               | ν(C–N)                                    | imidazole                                     | ν(C18–N14)(17), ν(C35–N14)(13), ν(C31–N15)(7), δ(H23–C22–C25)(4)             |
| 31. | 1223                                        |                               | ρ <sub>t</sub> (CH <sub>2</sub> )         | –CH <sub>2</sub> –                            | δ(H27–C25–C28)(7), δ(C19–C22–H23)(5), δ(C22–C25–H27)(4), ν(C17–C18)(4)       |
| 32. | 1176                                        | 1195                          | δ(im)                                     | imidazole                                     | δ(H16–N15–C31)(12), δ(H16–N15–C33)(12)                                       |

|     |      |         |                                   |                                     |                                                                                             |
|-----|------|---------|-----------------------------------|-------------------------------------|---------------------------------------------------------------------------------------------|
| 33. | 1152 | 1161 br | v(P=O), $\delta$ (POH)            | phosphonate P=O                     | v(P2-O4)(16), $\delta$ (P2-O6-H7)(14)                                                       |
| 34. | 1138 |         |                                   |                                     | $\delta$ (P3-O10-H11)(30), v(P3-O8)(12)                                                     |
| 35. | 1094 | 1096    | v(C-N)                            | imidazole                           | v(C33-N15)(18), $\delta$ (N15-C31-H32)(4), v(C18-N14)(4)                                    |
| 36. | 1072 | 1063    | v(C-O)                            | hydroxyl C-OH                       | v(C17-O12)(11), $\delta$ (P3-O10-H11)(5)                                                    |
| 37. | 1052 |         | v(P=O), $\delta$ (POH)            | phosphonate P=O                     | v(P3-O8)(18), $\delta$ (P3-O10-H11)(14)                                                     |
| 38. | 1041 | 1037    |                                   |                                     | (P2-O6-H7)(21), v(P2-O4)(15)                                                                |
| 39. | 983  | 1000    | $\delta_{\text{ring}}(\text{im})$ | imidazole                           | $\delta$ (H16-N15-C33)(10)                                                                  |
| 40. | 965  | 957     | v(C-C)                            | -CH <sub>2</sub> -CH <sub>2</sub> - | v(C19-C25)(21), v(C25-C28)(20)                                                              |
| 41. | 931  | 934     | v(P-O)                            | phosphonate P-O                     | v(P3-O9)(20), v(P3-O8)(10)                                                                  |
| 42. | 916  | 911     |                                   |                                     | v(P2-O5)(15), v(P2-O4)(7)                                                                   |
| 43. | 898  | 887     | v(C-C)                            | -CH <sub>2</sub> -CH <sub>2</sub> - | v(C22-C25)(16), v(C19-C22)(5)                                                               |
| 44. | 852  | 839     | $\gamma(\text{im})$               | imidazole                           | $\gamma$ (H32-C31,N14,N15)(9), $\gamma$ (H36-C35,N14,C33)(9), $\gamma$ (H34-C33,N15,C35)(7) |
| 45. | 746  | 769     | v(P-O)                            | phosphonate P-OH                    | v(P2-O6)(15), v(P3-O10)(6)                                                                  |
| 46. | 729  | 739     |                                   |                                     | v(P3-O10)(18)                                                                               |
| 47. | 639  | 642     | $\tau(\text{im})$                 | imidazole                           | $\tau$ (C18-N14-C35-C33)(7)                                                                 |
| 48. | 626  |         |                                   |                                     | $\tau$ (C33-C35-N14-C18)(25), $\tau$ (C35-C33-N15-C31)(13), $\gamma$ (H36-C35,N14,C33)(4)   |
| 49. | 578  |         |                                   |                                     | 592                                                                                         |
| 50. | 548  | 552     | v(Cu-O)                           | metal-ligand vib.                   | v(Cu1-O5)(5), v(Cu1-O9)(4)                                                                  |
| 51. | 460  | 475     | $\tau(\text{skel})$               | skeletal vib.                       | $\tau$ (C18-C19-C22-C25)(4)                                                                 |
| 52. | 433  | 447     | $\delta(\text{OPO})$              | phosphonate O-P-O                   | $\delta$ (O8-P3-O9)(11), $\delta$ (O9-P3-O10)(4)                                            |
| 53. | 421  | 412     |                                   |                                     | $\delta$ (O8-P3-O10)(8)                                                                     |

<sup>a</sup>Scaling factors for the calculated harmonic frequencies: 0.946 for modes 1-16, 0.973 for modes 17-26, 1.000 for modes 27-53. <sup>b</sup>Abbreviations: br – broad, v – stretching,  $\delta$  – in-plane bending,  $\rho_s$  – scissoring,  $\rho_w$  – wagging,  $\rho_t$  – twisting,  $\gamma$  – out-of-plane bending,  $\tau$  – torsion. Subscripts: as – antisymmetric; s – symmetric. <sup>c</sup>Vibrational bands assignment for the most characteristic functional groups based on the significant contribution in the potential energy distribution. <sup>d</sup>The PED values are listed if a contributor is among the top four and is  $\geq 4\%$ .



**Table S12.** Frequencies of theoretical and experimental IR bands and their vibrational assignments of ligand **1**.

| No. | Calcd <sup>a</sup><br>ν [cm <sup>-1</sup> ] | Exp.<br>ν [cm <sup>-1</sup> ] | General assignment <sup>b,c</sup>  | Functional group            | PED <sup>d</sup>                                                              |
|-----|---------------------------------------------|-------------------------------|------------------------------------|-----------------------------|-------------------------------------------------------------------------------|
| 1.  | 3685                                        | 3461 br                       | v(O–H)                             | phosphonate PO–H            | v(O10–H11)(100)                                                               |
| 2.  | 3536                                        |                               | v(N–H)                             | imidazole                   | v(N15–H16)(99)                                                                |
| 3.  | 3481                                        |                               | v(O–H)                             | hydroxyl CO–H               | v(O12–H13)(74)                                                                |
| 4.  | 3365                                        |                               | v(O–H)                             | phosphonate PO–H            | v(O5–H6)(69)                                                                  |
| 5.  | 3246                                        |                               | v(O–H)                             |                             | v(O3–H4)(71)                                                                  |
| 6.  | 3218                                        | 3188                          | v(C–H)                             | imidazole                   | v(C31–H32)(71), v(C27–H28)(21), v(C29–H30)(6)                                 |
| 7.  | 3214                                        |                               |                                    |                             | v(C27–H28)(77), v(C31–H32)(20)                                                |
| 8.  | 3180                                        | 3166                          |                                    |                             | v(C29–H30)(92), v(C31–H32)(7)                                                 |
| 9.  | 3045                                        | 3054                          | v <sub>as</sub> (C–H)              | –CH <sub>3</sub>            | v(C19–H21)(57), v(C19–H22)(26), v(C23–H25)(4)                                 |
| 10. | 3038                                        |                               |                                    |                             | v(C23–H24)(56), v(C23–H25)(37), v(C19–H22)(4)                                 |
| 11. | 3030                                        |                               |                                    |                             | v(C19–H20)(46), v(C19–H22)(33), v(C19–H21)(14)                                |
| 12. | 3024                                        |                               |                                    |                             | v(C23–H26)(43), v(C23–H25)(34), v(C23–H24)(15)                                |
| 13. | 2947                                        | 2959                          | v <sub>s</sub> (C–H)               | –CH <sub>3</sub>            | v(C19–H20)(44), v(C19–H22)(22), v(C19–H21)(21), v(C23–H26)(5)                 |
| 14. | 2941                                        |                               |                                    |                             | v(C23–H26)(47), v(C23–H25)(21), v(C23–H24)(20), v(C19–H20)(5)                 |
| 15. | 1573                                        | 1580                          | v(C=C), v(C–N), δ(im)              | imidazole                   | δ(H16–N15–C29)(43), δ(H16–N15–C27)(32), v(C29–C31)(19), v(C27–N14)(6)         |
| 16. | 1538                                        | 1535                          | v(C=N), v(C–N), δ(im)              | imidazole                   | δ(C29–N15–H16)(33), v(C27–N15)(26), v(C27–N14)(15), δ(N15–C29–H30)(5)         |
| 17. | 1506                                        | 1483                          | δ <sub>as</sub> (CH <sub>3</sub> ) | –CH <sub>3</sub>            | δ(H24–C23–H25)(34), δ(H21–C19–H22)(20), δ(H25–C23–H26)(9), δ(H20–C19–H21)(4)  |
| 18. | 1483                                        |                               |                                    |                             | δ(H21–C19–H22)(32), δ(H24–C23–H25)(20), δ(H25–C23–H26)(13), δ(H20–C19–H21)(9) |
| 19. | 1446                                        | 1468                          | v(C=N), v(C–N), v(C=C)             | imidazole                   | v(C29–N15)(23), v(C27–N15)(20), v(C29–C31)(18), v(C27–N14)(6)                 |
| 20. | 1410                                        | 1397                          | δ <sub>s</sub> (CH <sub>3</sub> )  | –CH <sub>3</sub>            | δ(H25–C23–H26)(21), δ(C18–C23–H25)(16), δ(C18–C23–H26)(10), δ(C18–C23–H24)(9) |
| 21. | 1386                                        | 1374                          | δ(COH)                             | hydroxyl C–O–H              | δ(C17–O12–H13)(79)                                                            |
| 22. | 1360                                        | 1352                          | v(C–N)                             | imidazole                   | v(C31–N14)(21), v(C27–N14)(17), δ(C29–C31–H32)(7), v(C29–N15)(6)              |
| 23. | 1334                                        | 1323                          | δ(POH)                             | phosphonate P–O–H           | δ(P1–O3–H4)(39), δ(P1–O5–H6)(26)                                              |
| 24. | 1311                                        | 1309                          | δ(im)                              | imidazole                   | δ(H16–N15–C29)(34), δ(H16–N15–C27)(33), δ(N14–C31–H32)(5), δ(C29–C31–H32)(4)  |
| 25. | 1263                                        | 1290-1225 br                  | v(skel), v(C–N), v(C=N)            | skeletal vib.,<br>imidazole | v(C18–N14)(16), v(C18–C23)(12), v(C31–N14)(8), v(C27–N15)(5)                  |
| 26. | 1243                                        |                               | ρ <sub>r</sub> (CH <sub>3</sub> )  | –CH <sub>3</sub>            | v(C17–C18)(24), δ(C18–C23–H26)(12), v(C18–C19)(24), δ(C18–C23–H24)(9)         |
| 27. | 1224                                        |                               | v(skel), δ(im)                     | skeletal vib.,<br>imidazole | v(C18–C19)(17), v(C18–C23)(16), δ(N14–C27–H28)(8), δ(N15–C27–H28)(6)          |
| 28. | 1189                                        | 1210                          | ρ <sub>r</sub> (CH <sub>3</sub> )  | –CH <sub>3</sub>            | δ(C18–C19–H21)(12), δ(C18–C23–H25)(12), v(C18–N14)(4)                         |
| 29. | 1179                                        | 1179                          | δ(POH)                             | phosphonate P–O–H           | δ(P1–O5–H6)(44), δ(P1–O3–H4)(33)                                              |
| 30. | 1141                                        | 1140                          | v(P=O), δ(POH)                     | phosphonate P=O             | v(P7–O8)(43), δ(P7–O10–H11)(22), v(P7–O9)(12)                                 |
| 31. | 1098                                        | 1100                          | v(C–O)                             | hydroxyl C–OH               | v(C12–O17)(49), v(C29–N15)(5)                                                 |
| 32. | 1093                                        |                               | v(C–N)                             | imidazole                   | v(C29–N15)(29), v(C12–O17)(13), δ(N14–C31–H32)(9), δ(C29–C31–H32)(8)          |

|     |      |        |                                           |                                 |                                                                                                                      |
|-----|------|--------|-------------------------------------------|---------------------------------|----------------------------------------------------------------------------------------------------------------------|
| 33. | 1076 | 1079   | v(P=O)                                    | phosphonate P=O                 | v(P1-O2)(78)                                                                                                         |
| 34. | 1028 | 1047   |                                           |                                 | $\delta$ (P7-O10-H11)(67), v(P7-O8)(20), v(P7-O9)(6)                                                                 |
| 35. | 1007 | 1005   | $\delta_{\text{ring}}(\text{im})$         | imidazole                       | $\delta$ (C29-N15-H16)(47), $\delta$ (N15-C29-H30)(5), $\delta$ (N14-C31-C29)(5), $\delta$ (N14-C27-N15)(4)          |
| 36. | 977  | 990    | $\rho_r(\text{CH}_3)$                     | -CH <sub>3</sub>                | v(C17-C18)(23), $\delta$ (C18-C23-H24)(17), v(C18-C19)(15), $\delta$ (C18-C23-H26)(15)                               |
| 37. | 972  |        |                                           |                                 | v(C18-C23)(21), $\delta$ (C18-C19-H22)(19), v(C17-C18)(17), $\delta$ (C18-C23-H25)(7)                                |
| 38. | 926  | 948    | $\delta_{\text{ring}}(\text{im})$         | imidazole                       | $\delta$ (C27-N15-C29)(29), $\delta$ (H16-N15-C27)(24), $\delta$ (H16-N15-C29)(14), $\delta$ (N15-C29-C31)(10)       |
| 39. | 923  | 896 br | v(P-O)                                    | phosphonate P-O                 | v(P7-O9)(41), v(P7-O8)(22)                                                                                           |
| 40. | 826  | 832    | $\gamma(\text{im})$                       | imidazole                       | $\gamma$ (H28-C27,N14,N15)(57), v(P1-C17)(11), v(P7-C17)(6), $\delta$ (P1-C17-C18)(5)                                |
| 41. | 749  | 747    | v(P-O)                                    | phosphonate P-OH                | v(P1-O3)(29), v(P1-O5)(21)                                                                                           |
| 42. | 692  | 683    |                                           |                                 | v(P7-O10)(53)                                                                                                        |
| 43. | 633  | 646    | $\tau(\text{im})$                         | imidazole                       | $\tau$ (N14-C27-N15-C29)(31), v(C18-N14)(10), $\tau$ (C17-C18-N14-C27)(6)                                            |
| 44. | 629  | 623    |                                           |                                 | $\tau$ (N14-C31-C29-N15)(58), $\tau$ (N14-C27-N15-C29)(21), $\tau$ (C31-C29-N15-C27)(13)                             |
| 45. | 578  | 547    |                                           |                                 | $\tau$ (N14-C27-N15-C29)(47), $\tau$ (N14-C31-C29-N15)(16), $\tau$ (C31-C29-N15-C27)(10), $\tau$ (P1-C17-O12-H13)(5) |
| 46. | 522  | 500    | $\delta(\text{OPO}), \delta(\text{skel})$ | phosphonate O-P-O skeletal vib. | $\tau$ (H11-O10-P7-O8)(10), $\delta$ (O8-P7-O9)(8), $\delta$ (O9-P7-C17)(6), $\delta$ (O10-P7-C17)(4)                |
| 47. | 468  | 470    |                                           |                                 | $\delta$ (C19-C18-C23)(10), $\delta$ (P1-C17-O12)(8), $\delta$ (O2-P1-C17)(6), $\tau$ (H6-O5-P1-O2)(5)               |
| 48. | 446  | 443    |                                           |                                 | $\delta$ (N14-C18-C19)(15), $\delta$ (N14-C18-C23)(9), $\delta$ (C18-N14-C31)(5), $\delta$ (C18-N14-C27)(5)          |
| 49. | 401  | 406    |                                           |                                 | $\tau$ (H11-O10-P7-O8)(9), $\delta$ (O8-P7-O9)(9), $\delta$ (O9-P7-O10)(8), $\delta$ (N14-C18-C23)(6)                |

<sup>a</sup>Scaling factors for the calculated harmonic frequencies: 0.961 for modes 1-14, 0.976 for modes 15-22, 1.000 for modes 23-49. <sup>b</sup>Abbreviations: br – broad, v – stretching,  $\delta$  – in-plane bending,  $\rho_r$  – rocking,  $\gamma$  – out-of-plane bending,  $\tau$  – torsion. Subscripts: as – antisymmetric; s – symmetric. <sup>c</sup>Vibrational bands assignment for the most characteristic functional groups based on the significant contribution in the potential energy distribution. <sup>d</sup>The PED values are listed if a contributor is among the top four and is  $\geq 4\%$ .

**Table S13.** Frequencies of theoretical and experimental IR bands and their vibrational assignments of ligand **3**.

| No. | Calcd <sup>a</sup><br>ν [cm <sup>-1</sup> ] | Exp.<br>ν [cm <sup>-1</sup> ]     | General assignment <sup>b,c</sup>                                              | Functional group                     | PED <sup>d</sup>                                                              |
|-----|---------------------------------------------|-----------------------------------|--------------------------------------------------------------------------------|--------------------------------------|-------------------------------------------------------------------------------|
| 1.  | 3651                                        | 3650-3185 br                      | v(O-H)                                                                         | phosphonate PO-H                     | v(O10-H11)(100)                                                               |
| 2.  | 3514                                        |                                   | v(N-H)                                                                         | imidazole                            | v(N15-H16)(99)                                                                |
| 3.  | 3616                                        |                                   | v(O-H)                                                                         | hydroxyl CO-H                        | v(O12-H13)(70)                                                                |
| 4.  | 3183                                        | 3175                              | v(C-H)                                                                         | imidazole                            | v(C28-H29)(75), v(C32-H33)(16), v(C30-H31)(6)                                 |
| 5.  | 3178                                        |                                   |                                                                                |                                      | v(C32-H33)(57), v(C28-H29)(23), v(C30-H31)(17)                                |
| 6.  | 3157                                        | 3150                              |                                                                                |                                      | v(C30-H31)(75), v(C32-H33)(24)                                                |
| 7.  | 3046                                        | 3058                              | v <sub>as</sub> (C-H)                                                          | -CH <sub>2</sub> -                   | v(C25-H26)(49), v(C22-H24)(19), v(C25-H27)(9), v(C22-H23)(7)                  |
| 8.  | 3047                                        |                                   | v(O-H)                                                                         | phosphonate PO-H                     | v(O5-H6)(65), v(O3-H4)(6)                                                     |
| 9.  | 3040                                        |                                   | v <sub>as</sub> (C-H)                                                          | -CH <sub>2</sub> -                   | v(C19-H21)(53), v(C25-H26)(24), v(C19-H20)(11), v(C22-H24)(4)                 |
| 10. | 3028                                        |                                   |                                                                                |                                      | v(C22-H24)(46), v(C19-H21)(22), v(C22-H23)(16), v(C25-H26)(12)                |
| 11. | 2969                                        | 2971                              | v <sub>s</sub> (C-H)                                                           | -CH <sub>2</sub> -                   | v(C22-H23)(66), v(C22-H24)(27)                                                |
| 12. | 2963                                        |                                   | v(O-H)                                                                         | phosphonate PO-H                     | v(O3-H4)(71), v(O5-H6)(6)                                                     |
| 13. | 2953                                        |                                   | v <sub>s</sub> (C-H)                                                           | -CH <sub>2</sub> -                   | v(C25-H27)(46), v(C19-H20)(32), v(C25-H26)(7), v(C19-H21)(5)                  |
| 14. | 2951                                        |                                   |                                                                                |                                      | v(C19-H20)(49), v(C25-H27)(34), v(C19-H21)(9), v(C25-H26)(5)                  |
| 15. | 1572                                        | 1577                              | v(C=C), v(C-N), δ(im)                                                          | imidazole                            | δ(H16-N15-C30)(33), δ(H16-N15-C28)(24), v(C30-C32)(17), v(C28-N14)(5)         |
| 16. | 1537                                        | 1535                              | v(C=N), v(C-N), δ(im)                                                          | imidazole                            | δ(H16-N15-C30)(28), v(C28-N15)(23), v(C28-N14)(14), δ(N15-C30-H31)(5)         |
| 17. | 1477                                        | 1473                              | ρ <sub>s</sub> (CH <sub>2</sub> )                                              | -CH <sub>2</sub> -                   | δ(H23-C22-H24)(22), δ(H20-C19-H21)(16), δ(H26-C25-H27)(12)                    |
| 18. | 1450                                        | 1436                              |                                                                                |                                      | δ(H20-C19-H21)(32), δ(H26-C25-H27)(18), δ(C18-C19-H21)(5), δ(C18-C19-H20)(5)  |
| 19. | 1444                                        | 1426                              | v(C=N), v(C-N), v(C=C)                                                         | imidazole                            | v(C30-N15)(23), v(C28-N15)(22), v(C30-C32)(18), v(C28-N14)(6)                 |
| 20. | 1373                                        | 1366                              | δ(COH), δ(POH)                                                                 | hydroxyl C-O-H,<br>phosphonate P-O-H | δ(C17-O12-H13)(28), δ(P1-O3-H4)(20), δ(P1-O5-H6)(16)                          |
| 21. | 1356                                        | 1350                              | v(C-N)                                                                         | imidazole                            | v(C32-N14)(22), v(C28-N14)(19), δ(H16-N15-C28)(7), v(C30-N15)(7)              |
| 22. | 1350                                        |                                   | δ(COH), δ(POH)                                                                 | hydroxyl C-O-H,<br>phosphonate P-O-H | δ(C17-O12-H13)(42), δ(P1-O3-H4)(26), v(C17-C18)(8)                            |
| 23. | 1316                                        | 1312                              | δ(im)                                                                          | imidazole                            | δ(H16-N15-C30)(52), δ(C30-C32-H33)(7), δ(N14-C28-H29)(7), δ(H31-C30-C32)(5)   |
| 24. | 1308                                        |                                   | ρ <sub>w</sub> (CH <sub>2</sub> )                                              | -CH <sub>2</sub> -                   | δ(C22-C25-H26)(18), δ(C18-C25-H26)(16), δ(C22-C25-H27)(9), δ(C18-C19-H21)(6)  |
| 25. | 1288                                        | ρ <sub>t</sub> (CH <sub>2</sub> ) | δ(C18-C25-H27)(12), δ(C22-C25-H27)(10), δ(C18-C19-H20)(7), v(C18-N14)(7)       |                                      |                                                                               |
| 26. | 1280                                        | ρ <sub>w</sub> (CH <sub>2</sub> ) | δ(H24-C22-C25)(18), δ(C19-C22-H24)(18), δ(H23-C22-C25)(10), δ(C19-C22-H23)(10) |                                      |                                                                               |
| 27. | 1263                                        | 1261                              | v(C-N)                                                                         | imidazole                            | v(C18-N14)(15), v(C32-N14)(13), δ(H20-C19-C22)(6), v(C28-N15)(5)              |
| 28. | 1227                                        | 1235                              | ρ <sub>t</sub> (CH <sub>2</sub> )                                              | -CH <sub>2</sub> -                   | δ(H23-C22-C25)(12), δ(H21-C19-C22)(11), δ(C19-C22-H23)(10), δ(C22-C25-H26)(8) |
| 29. | 1187                                        | 1191                              | v(skel)                                                                        | skeletal vib.                        | v(C17-C18)(26), δ(H21-C19-C22)(10), v(C17-O12)(5), δ(C22-C25-H26)(5)          |
| 30. | 1119                                        | 1129                              | v(P=O), δ(POH)                                                                 | phosphonate P=O                      | δ(P7-O10-H11)(49), v(P7-O8)(14), v(P7-O9)(8)                                  |
| 31. | 1087                                        | 1097                              | v(C-O), v(C-N)                                                                 | hydroxyl C-OH,<br>imidazole          | v(C12-O17)(26), v(C30-N15)(16), δ(C18-C19-H20)(5), δ(C18-C19-H21)(4)          |

|     |      |      |                                              |                                     |                                                                                                                              |
|-----|------|------|----------------------------------------------|-------------------------------------|------------------------------------------------------------------------------------------------------------------------------|
| 32. | 1080 | 1057 | $\nu(\text{P}=\text{O})$                     | phosphonate P=O                     | $\nu(\text{P1-O2})(69)$                                                                                                      |
| 33. | 1037 | 1020 | $\nu(\text{P}=\text{O}), \delta(\text{POH})$ | phosphonate P=O                     | $\delta(\text{P7-O10-H11})(36), \nu(\text{P7-O8})(22), \nu(\text{P7-O9})(15)$                                                |
| 34. | 997  | 987  | $\delta_{\text{ring}}(\text{im})$            | imidazole                           | $\delta(\text{H16-N15-C30})(38), \delta(\text{N14-C32-C30})(5), \nu(\text{C18-N14})(5), \delta(\text{N15-C30-H31})(5)$       |
| 35. | 975  | 952  | $\nu(\text{C}-\text{C})$                     | -CH <sub>2</sub> -CH <sub>2</sub> - | $\nu(\text{C22-C25})(39), \nu(\text{C17-C18})(12)$                                                                           |
| 36. | 967  |      |                                              |                                     | $\nu(\text{C19-C22})(39), \nu(\text{C17-C18})(10)$                                                                           |
| 37. | 942  | 934  | $\delta(\text{skel})$                        | skeletal vib.                       | $\nu(\text{C17-C18})(9), \delta(\text{N14-C18-C17})(6), \delta(\text{P1-C17-C18})(6), \delta(\text{H16-N15-C30})(6)$         |
| 38. | 917  | 910  | $\nu(\text{P}-\text{O})$                     | phosphonate P-O                     | $\nu(\text{P7-O9})(27), \nu(\text{P7-O8})(23), \nu(\text{P7-O10})(12)$                                                       |
| 39. | 858  | 869  | $\nu(\text{P}-\text{O})$                     | phosphonate P-OH                    | $\nu(\text{P1-O5})(19), \nu(\text{P1-O3})(12), \gamma(\text{H29-C28,N14,N15})(8), \delta(\text{N14-C18-C17})(4)$             |
| 40. | 848  | 851  | $\gamma(\text{im})$                          | imidazole                           | $\gamma(\text{H33-C32,N14,C30})(51), \gamma(\text{H31-C30,N15,C32})(26), \tau(\text{N14-C32-C30-N15})(9)$                    |
| 41. | 834  | 832  |                                              |                                     | $\gamma(\text{H29-C28,N14,N15})(59), \tau(\text{N14-C28-N15-C30})(5)$                                                        |
| 42. | 759  | 757  | $\nu(\text{P}-\text{O})$                     | phosphonate P-OH                    | $\nu(\text{P1-O3})(22), \nu(\text{P7-O10})(22), \nu(\text{P1-O5})(18)$                                                       |
| 43. | 722  | 725  |                                              |                                     | $\nu(\text{P7-O10})(32), \gamma(\text{H31-C30,N15,C32})(30), \gamma(\text{H33-C32,N14,C30})(14)$                             |
| 44. | 682  | 677  | $\tau(\text{im})$                            | imidazole                           | $\tau(\text{C17-C18-N14-C28})(25), \tau(\text{N14-C32-C30-N15})(16), \tau(\text{N14-C28-N15-C30})(10)$                       |
| 45. | 630  | 637  |                                              |                                     | $\tau(\text{N14-C28-N15-C30})(38), \tau(\text{P1-C17-O12-H13})(21), \tau(\text{C17-C18-N14-C28})(7)$                         |
| 46. | 612  | 623  | $\tau(\text{skel})$                          | skeletal vib.                       | $\tau(\text{P1-C17-O12-H13})(64), \tau(\text{N14-C32-C30-N15})(5)$                                                           |
| 47. | 577  | 566  | $\tau(\text{im})$                            | imidazole                           | $\tau(\text{N14-C28-N15-C30})(55), \tau(\text{N14-C32-C30-N15})(20), \tau(\text{C32-C30-N15-C28})(12)$                       |
| 48. | 544  | 552  | $\delta(\text{skel})$                        | skeletal vib.                       | $\delta(\text{C17-C18-C25})(13), \delta(\text{P1-C17-C18})(8), \tau(\text{N14-C18-C17-P1})(8), \delta(\text{P7-C17-C18})(7)$ |
| 49. | 516  | 511  |                                              |                                     | $\tau(\text{N14-C18-C17-P1})(6), \delta(\text{O12-C17-C18})(5), \delta(\text{O10-P7-C17})(4), \delta(\text{O8-P7-C17})(4)$   |
| 50. | 476  | 478  | $\delta(\text{OPO}), \delta(\text{skel})$    | phosphonate O-P-O<br>skeletal vib.  | $\delta(\text{O9-P7-O10})(8), \nu(\text{C17-P1})(7), \delta(\text{O2-P1-C17})(5), \delta(\text{O8-P7-C17})(5)$               |
| 51. | 444  | 437  |                                              |                                     | $\delta(\text{O2-P1-O5})(6), \delta(\text{O10-P7-C17})(4), \delta(\text{O3-P1-C17})(4)$                                      |

<sup>a</sup>Scaling factors for the calculated harmonic frequencies: 0.955 for modes 1-14, 0.975 for modes 15-22, 1.000 for modes 23-51. <sup>b</sup>Abbreviations: br – broad,  $\nu$  – stretching,  $\delta$  – in-plane bending,  $\rho_s$  – scissoring,  $\rho_w$  – wagging,  $\rho_t$  – twisting,  $\gamma$  – out-of-plane bending,  $\tau$  – torsion. Subscripts: as – antisymmetric; s – symmetric. <sup>c</sup>Vibrational bands assignment for the most characteristic functional groups based on the significant contribution in the potential energy distribution. <sup>d</sup>The PED values are listed if a contributor is among the top four and is  $\geq 4\%$ .

**Table S14.** Frequencies of theoretical and experimental IR bands and their vibrational assignments of of ligand **4**.

| No. | Calcd <sup>a</sup><br>ν [cm <sup>-1</sup> ] | Exp.<br>ν [cm <sup>-1</sup> ] | General assignment <sup>b,c</sup>                             | Functional group                                              | PED <sup>d</sup>                                                              |
|-----|---------------------------------------------|-------------------------------|---------------------------------------------------------------|---------------------------------------------------------------|-------------------------------------------------------------------------------|
| 1.  | 3641                                        | 3650-3225 br                  | v(O–H)                                                        | phosphonate PO–H                                              | v(O8–H9)(99)                                                                  |
| 2.  | 3629                                        |                               |                                                               |                                                               | v(O10–H11)(80)                                                                |
| 3.  | 3604                                        |                               | v(N–H)                                                        | imidazole                                                     | v(O4–H5)(76)                                                                  |
| 4.  | 3507                                        |                               |                                                               |                                                               | v(N15–H16)(99)                                                                |
| 5.  | 3200                                        | 3197                          | v(C–H)                                                        | imidazole                                                     | v(C35–H36)(93), v(C33–H34)(4)                                                 |
| 6.  | 3175                                        | 3178                          |                                                               |                                                               | v(C31–H32)(97)                                                                |
| 7.  | 3156                                        | 3155                          |                                                               |                                                               | v(C33–H34)(90), v(C35–H36)(4), δ(C33–C35–H36)(4)                              |
| 8.  | 3011                                        | 3014                          | v <sub>as</sub> (C–H)                                         | –CH <sub>2</sub> –                                            | v(C28–H29)(63), v(C28–H30)(27)                                                |
| 9.  | 3003                                        | 3008                          |                                                               |                                                               | v(C19–H21)(50), v(C19–H20)(37), v(C28–H29)(5)                                 |
| 10. | 2986                                        | 2975                          | v(C25–H27)(36), v(C22–H23)(30), v(C25–H26)(12), v(C22–H24)(7) |                                                               |                                                                               |
| 11. | 2968                                        | 2962                          | v <sub>as</sub> /v <sub>s</sub> (C–H)                         |                                                               | v(C22–H23)(43), v(C25–H27)(23), v(C28–H30)(9), v(C28–H29)(8)                  |
| 12. | 2951                                        | 2941                          | v <sub>s</sub> (C–H)                                          |                                                               | v(C19–H20)(48), v(C19–H21)(43)                                                |
| 13. | 2933                                        | 2918                          |                                                               |                                                               | v(C25–H26)(54), v(C25–H27)(22), v(C22–H24)(15), v(C22–H23)(4)                 |
| 14. | 2919                                        | 2908                          |                                                               | v(C22–H24)(64), v(C25–H26)(18), v(C22–H23)(13), v(C25–H27)(3) |                                                                               |
| 15. | 2564                                        | n.o.                          | v(O–H)                                                        | hydroxyl CO–H                                                 | v(O12–H13)(89)                                                                |
| 16. | 1581                                        | 1578                          | δ(im), v(C=C)                                                 | imidazole                                                     | δ(N14–C35–H36)(36), v(C33–C35)(13), δ(H16–N15–C33)(13), δ(H16–N15–C31)(8)     |
| 17. | 1544                                        | 1534                          | δ(COH)                                                        | hydroxyl C–O–H                                                | δ(C17–O12–H13)(90)                                                            |
| 18. | 1540                                        |                               | v(C–N), v(C=N), δ(im)                                         | imidazole                                                     | v(C31–N15)(42), δ(H16–N15–C33)(16), v(C31–N14)(15), δ(N15–C33–H34)(13)        |
| 19. | 1507                                        | 1509                          | ρ <sub>s</sub> (CH <sub>2</sub> )                             | –CH <sub>2</sub> –                                            | δ(H29–C28–H30)(21), δ(H20–C19–H21)(20), δ(H26–C25–H27)(13), δ(H23–C22–H24)(7) |
| 20. | 1488                                        | 1478                          |                                                               |                                                               | δ(H20–C19–H21)(31), δ(H26–C25–H27)(27), δ(H23–C22–H24)(5), δ(C18–C19–H21)(5)  |
| 21. | 1486                                        |                               |                                                               |                                                               | δ(H29–C28–H30)(43), δ(H23–C22–H24)(20), δ(H20–C19–H21)(8)                     |
| 22. | 1447                                        | 1460                          | v(C–N), v(C=C), v(C=N)                                        | imidazole                                                     | v(C33–N15)(31), v(C31–N15)(26), v(C33–C35)(23), v(C31–N14)(5)                 |
| 23. | 1376                                        | 1356                          | v(C–N)                                                        |                                                               | v(C35–N14)(27), v(C31–N14)(13), δ(H34–C33–C35)(11), δ(C33–C35–H36)(8)         |
| 24. | 1355                                        |                               | ρ <sub>w</sub> (CH <sub>2</sub> )                             | –CH <sub>2</sub> –                                            | δ(H21–C19–C22)(14), δ(C18–C19–H21)(12), δ(C25–C28–H30)(9), δ(C18–C28–H30)(8)  |
| 25. | 1317                                        |                               |                                                               |                                                               | 1317                                                                          |
| 26. | 1270                                        | 1283                          | ρ <sub>w</sub> /ρ <sub>t</sub> (CH <sub>2</sub> )             | –CH <sub>2</sub> –                                            | δ(C18–C28–H29)(10), δ(C33–C35–H36)(9), v(C18–N14)(7), δ(H24–C22–C25)(5)       |
| 27. | 1254                                        | 1246                          | ρ <sub>t</sub> (CH <sub>2</sub> )                             |                                                               | δ(C22–C25–H27)(10), δ(H23–C22–C25)(9), v(C35–N14)(8), δ(C22–C25–H26)(8)       |
| 28. | 1225                                        | 1220                          |                                                               |                                                               | δ(C19–C22–H23)(11), v(C17–C18)(10), δ(H27–C25–C28)(8), δ(C19–C22–H24)(6)      |
| 29. | 1172                                        | 1199                          | δ(im)                                                         | imidazole                                                     | δ(H16–N15–C31)(26), δ(N15–C31–H32)(11), δ(N14–C31–H32)(9)                     |
| 30. | 1139                                        | 1146                          | v(P=O), δ(POH)                                                | phosphonate P=O                                               | v(P6–O7)(31), δ(P6–O8–H9)(19), v(C17–C18)(15), δ(P6–O10–H11)(12)              |
| 31. | 1129                                        | 1111                          | δ(im)                                                         | imidazole                                                     | δ(C33–C35–H36)(38), δ(N14–C35–H36)(32), δ(H34–C33–C35)(10), δ(N15–C33–H34)(9) |
| 32. | 1090                                        | 1094                          | v(C–N)                                                        |                                                               | v(C33–N15)(51), δ(C31–N14–C35)(15), v(C18–N14)(8)                             |

|     |      |        |                                                     |                                     |                                                                                                                                 |
|-----|------|--------|-----------------------------------------------------|-------------------------------------|---------------------------------------------------------------------------------------------------------------------------------|
| 33. | 1075 | 1063   | $\nu(\text{P}=\text{O}), \delta(\text{POH})$        | phosphonate P=O                     | $\nu(\text{P1-O3})(32), \nu(\text{P1-O2})(15), \delta(\text{P1-O4-H5})(14), \nu(\text{C17-O12})(12)$                            |
| 34. | 1065 |        | $\nu(\text{C-O})$                                   | hydroxyl C-OH                       | $\nu(\text{C17-O12})(19), \nu(\text{C22-C25})(13), \nu(\text{C25-C28})(9), \nu(\text{P1-O3})(7)$                                |
| 35. | 1048 | 1042   | $\nu(\text{P}=\text{O}), \delta(\text{POH})$        | phosphonate P=O                     | $\nu(\text{P6-O7})(17), \delta(\text{P1-O4-H5})(12), \delta(\text{P6-O8-H9})(9), \nu(\text{P1-O3})(9)$                          |
| 36. | 1041 |        | $\nu(\text{C-O})$                                   | hydroxyl C-OH                       | $\nu(\text{C17-O12})(24), \delta(\text{C33-C35-H36})(12), \nu(\text{C19-C22})(9), \nu(\text{C22-C25})(9)$                       |
| 37. | 1021 | 1019   | $\delta_{\text{ring}}(\text{im})$                   | imidazole                           | $\delta(\text{H16-N15-C33})(14), \delta(\text{H34-C33-N15})(11), \nu(\text{C18-N14})(7), \delta(\text{C31-N14-C35})(7)$         |
| 38. | 979  |        |                                                     |                                     | $\delta(\text{N14-C35-C33})(36), \delta(\text{C31-N14-C35})(8), \delta(\text{H16-N15-C33})(6), \delta(\text{N14-C31-N15})(4)$   |
| 39. | 966  | 960    | $\nu(\text{C-C})$                                   | -CH <sub>2</sub> -CH <sub>2</sub> - | $\nu(\text{C25-C28})(24), \nu(\text{C19-C22})(5), \nu(\text{C18-C28})(4)$                                                       |
| 40. | 942  | 937    | $\delta(\text{skel}), \nu(\text{skel})$             | skeletal vib.                       | $\delta(\text{N14-C18-C17})(7), \nu(\text{C18-C19})(7), \delta(\text{P1-C17-C18})(6), \nu(\text{P6-C17})(6)$                    |
| 41. | 910  | 901 br | $\nu(\text{P-O})$                                   | phosphonate P-O                     | $\nu(\text{P1-O2})(55), \nu(\text{P1-O3})(13), \nu(\text{P1-O4})(12)$                                                           |
| 42. | 843  | 834    | $\gamma(\text{im})$                                 | imidazole                           | $\gamma(\text{H34-C33,N15,C35})(47), \tau(\text{N14-C35-C33-N15})(18)$                                                          |
| 43. | 822  |        |                                                     |                                     | $\gamma(\text{H32-C31,N14,N15})(61), \tau(\text{N14-C31-N15-C33})(13)$                                                          |
| 44. | 740  | 758 br | $\nu(\text{P-O})$                                   | phosphonate P-OH                    | $\nu(\text{P1-O4})(40), \nu(\text{P1-O2})(8), \delta(\text{O12-C17-C18})(5)$                                                    |
| 45. | 724  |        |                                                     |                                     | $\nu(\text{P6-O10})(33), \nu(\text{P6-O8})(19), \nu(\text{P1-O4})(8)$                                                           |
| 46. | 645  | 643    | $\tau(\text{im}), \delta_{\text{ring}}(\text{cpt})$ | imidazole, cyclopent                | $\tau(\text{N14-C31-N15-C33})(20), \delta(\text{C22-C25-C28})(9), \delta(\text{C19-C22-C25})(9), \delta(\text{C19-C22-H24})(5)$ |
| 47. | 632  | 624    | $\tau(\text{im})$                                   | imidazole                           | $\tau(\text{N14-C35-C33-N15})(63), \tau(\text{C35-C33-N15-C31})(8), \tau(\text{N14-C31-N15-C33})(5)$                            |
| 48. | 582  | 588    |                                                     |                                     | $\tau(\text{N14-C31-N15-C33})(49), \tau(\text{N14-C35-C33-N15})(21), \tau(\text{C35-C33-N15-C31})(10)$                          |
| 49. | 492  | 483    | $\delta(\text{OPO})$                                | phosphonate O-P-O                   | $\delta(\text{O7-P6-O10})(11), \delta(\text{O8-P6-O10})(11), \delta(\text{O10-P6-C17})(6), \nu(\text{P6-C17})(5)$               |
| 50. | 436  | 454    |                                                     |                                     | $\delta(\text{O2-P1-O3})(22), \delta(\text{O7-P6-O10})(9), \delta(\text{O8-P6-O10})(6), \delta(\text{O10-P6-C17})(4)$           |
| 51. | 412  | 429    |                                                     |                                     | $\delta(\text{O3-P1-O4})(14), \delta(\text{O12-C17-C18})(8), \delta(\text{O7-P6-O10})(5), \delta(\text{O7-P6-O8})(4)$           |

<sup>a</sup>Scaling factors for the calculated harmonic frequencies: 0.953 for modes 1-15, 0.984 for modes 16-25, 1.000 for modes 26-51. <sup>b</sup>Abbreviations: br – broad,  $\nu$  – stretching,  $\delta$  – in-plane bending,  $\rho_s$  – scissoring,  $\rho_w$  – wagging,  $\rho_t$  – twisting,  $\gamma$  – out-of-plane bending,  $\tau$  – torsion. Subscripts: as – antisymmetric; s – symmetric. <sup>c</sup>Vibrational bands assignment for the most characteristic functional groups based on the significant contribution in the potential energy distribution. <sup>d</sup>The PED values are listed if a contributor is among the top four and is  $\geq 4\%$ .

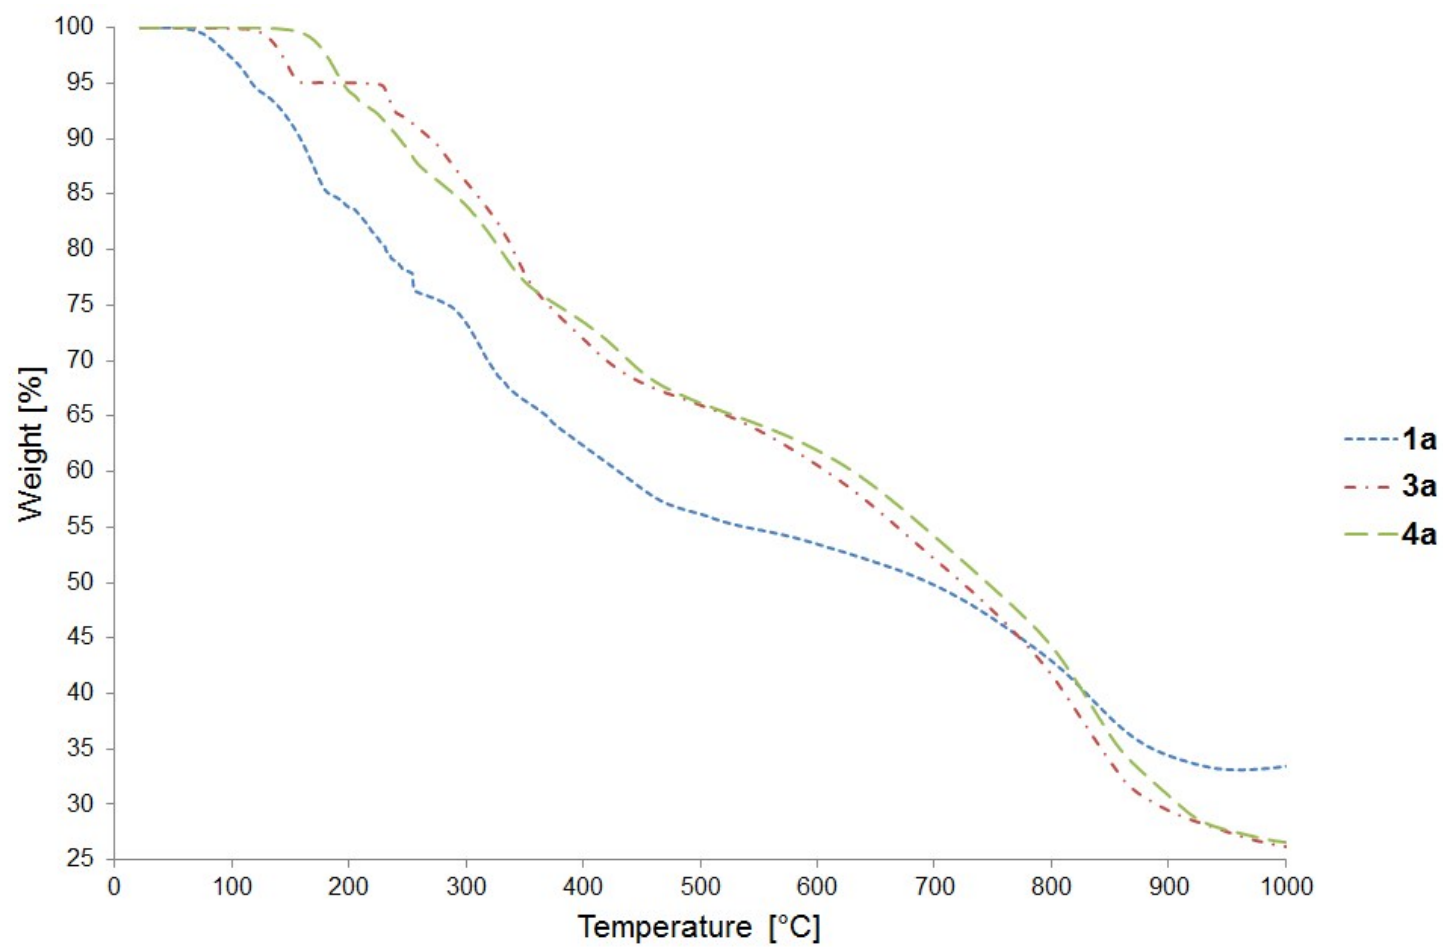

**Figure S21.** TG curves recorded for **1a**, **3a** and **4a**.

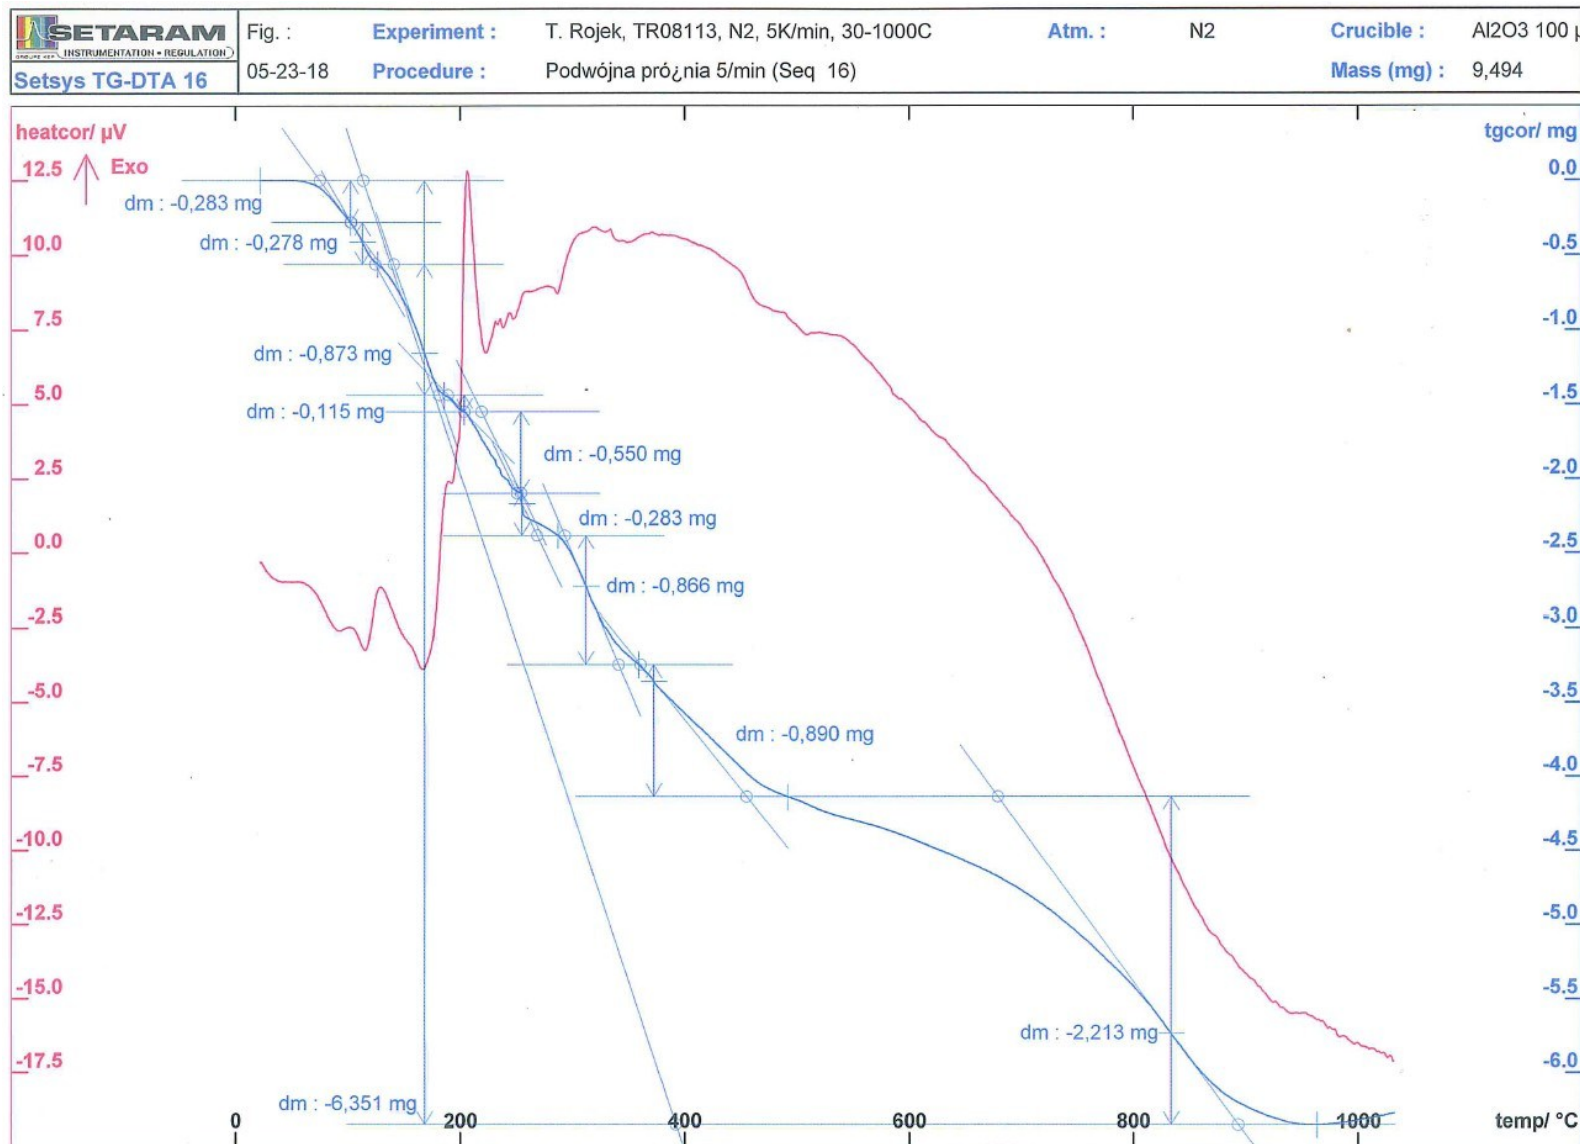

Figure S22. TG-DTA plot for the complex **1a**.



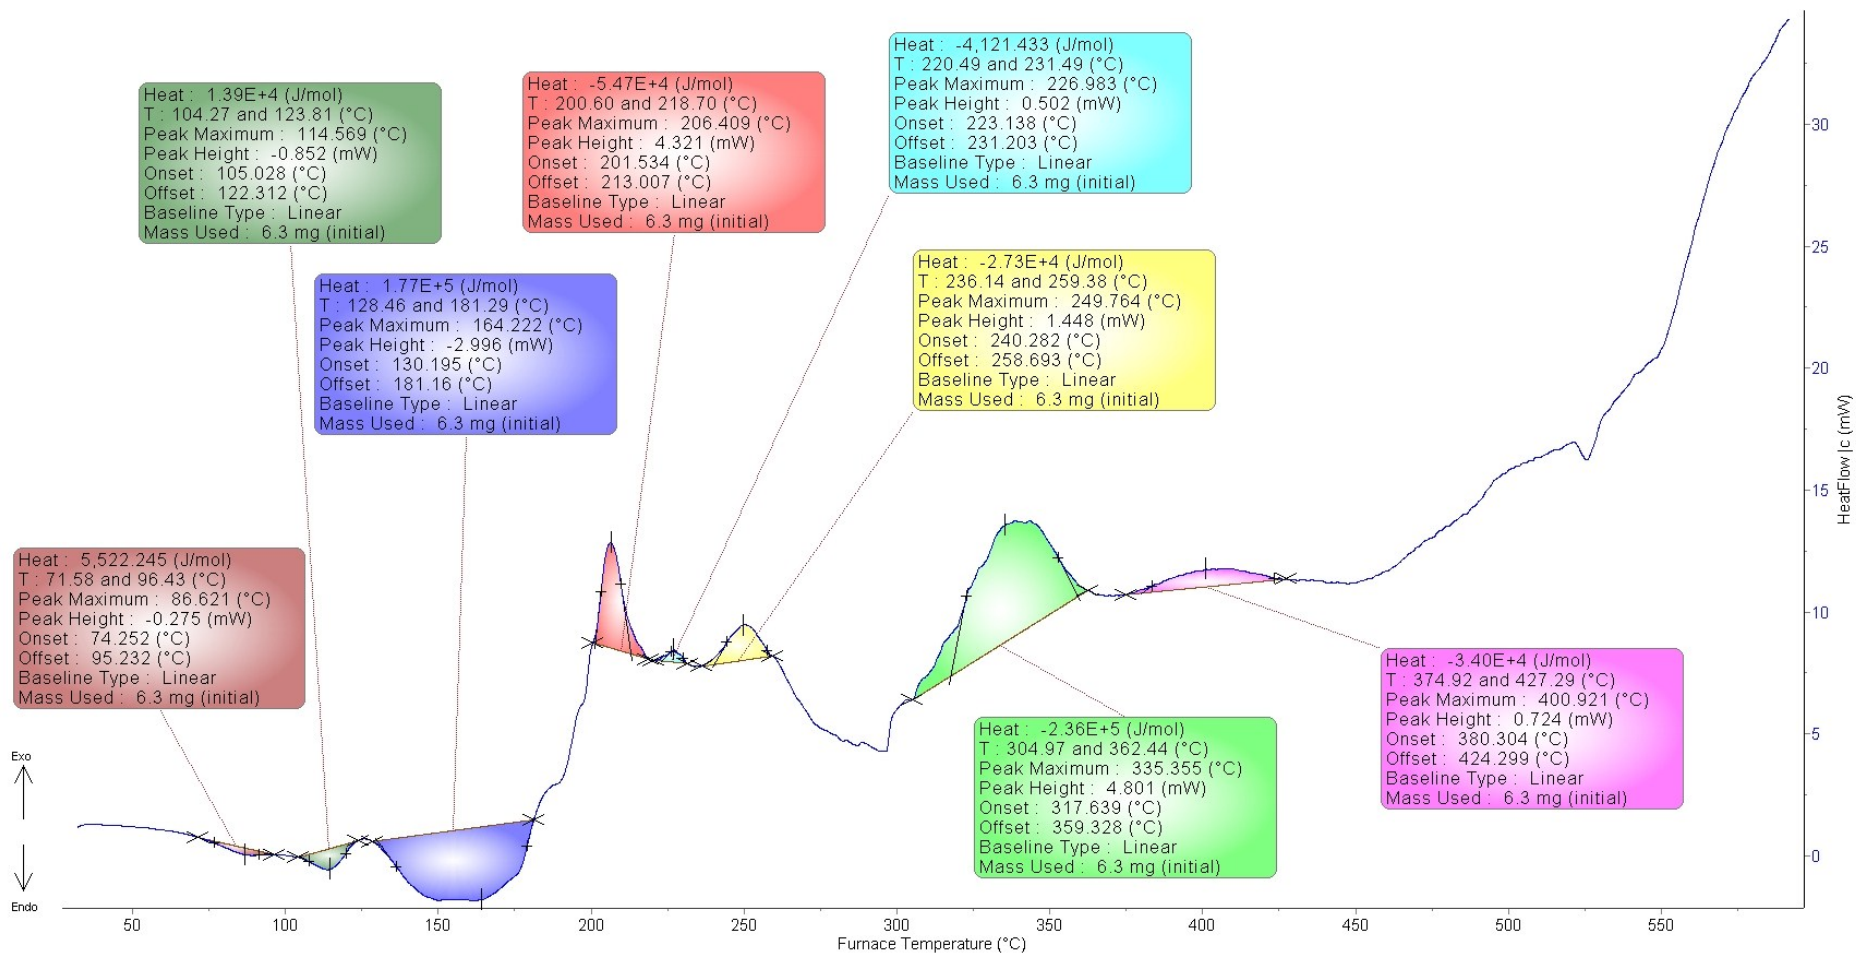

Figure S23. DSC plot for the complex 1a.

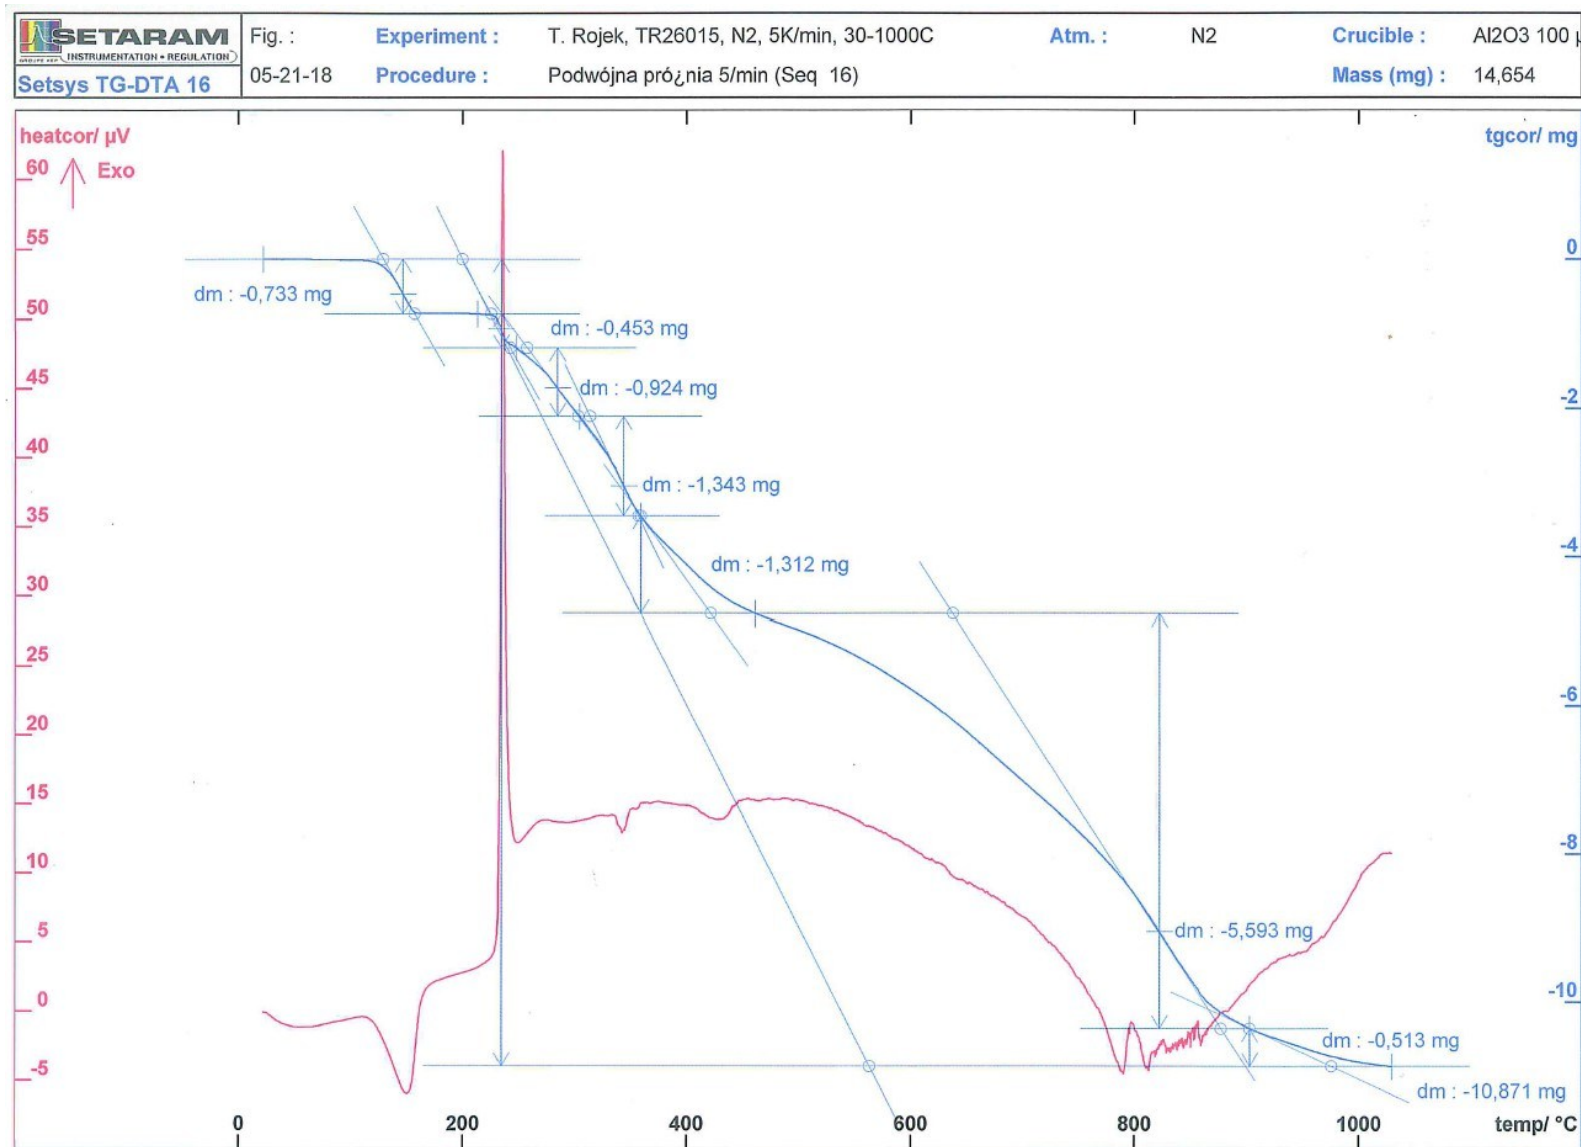

Figure S24. TG-DTA plot for the complex **3a**.

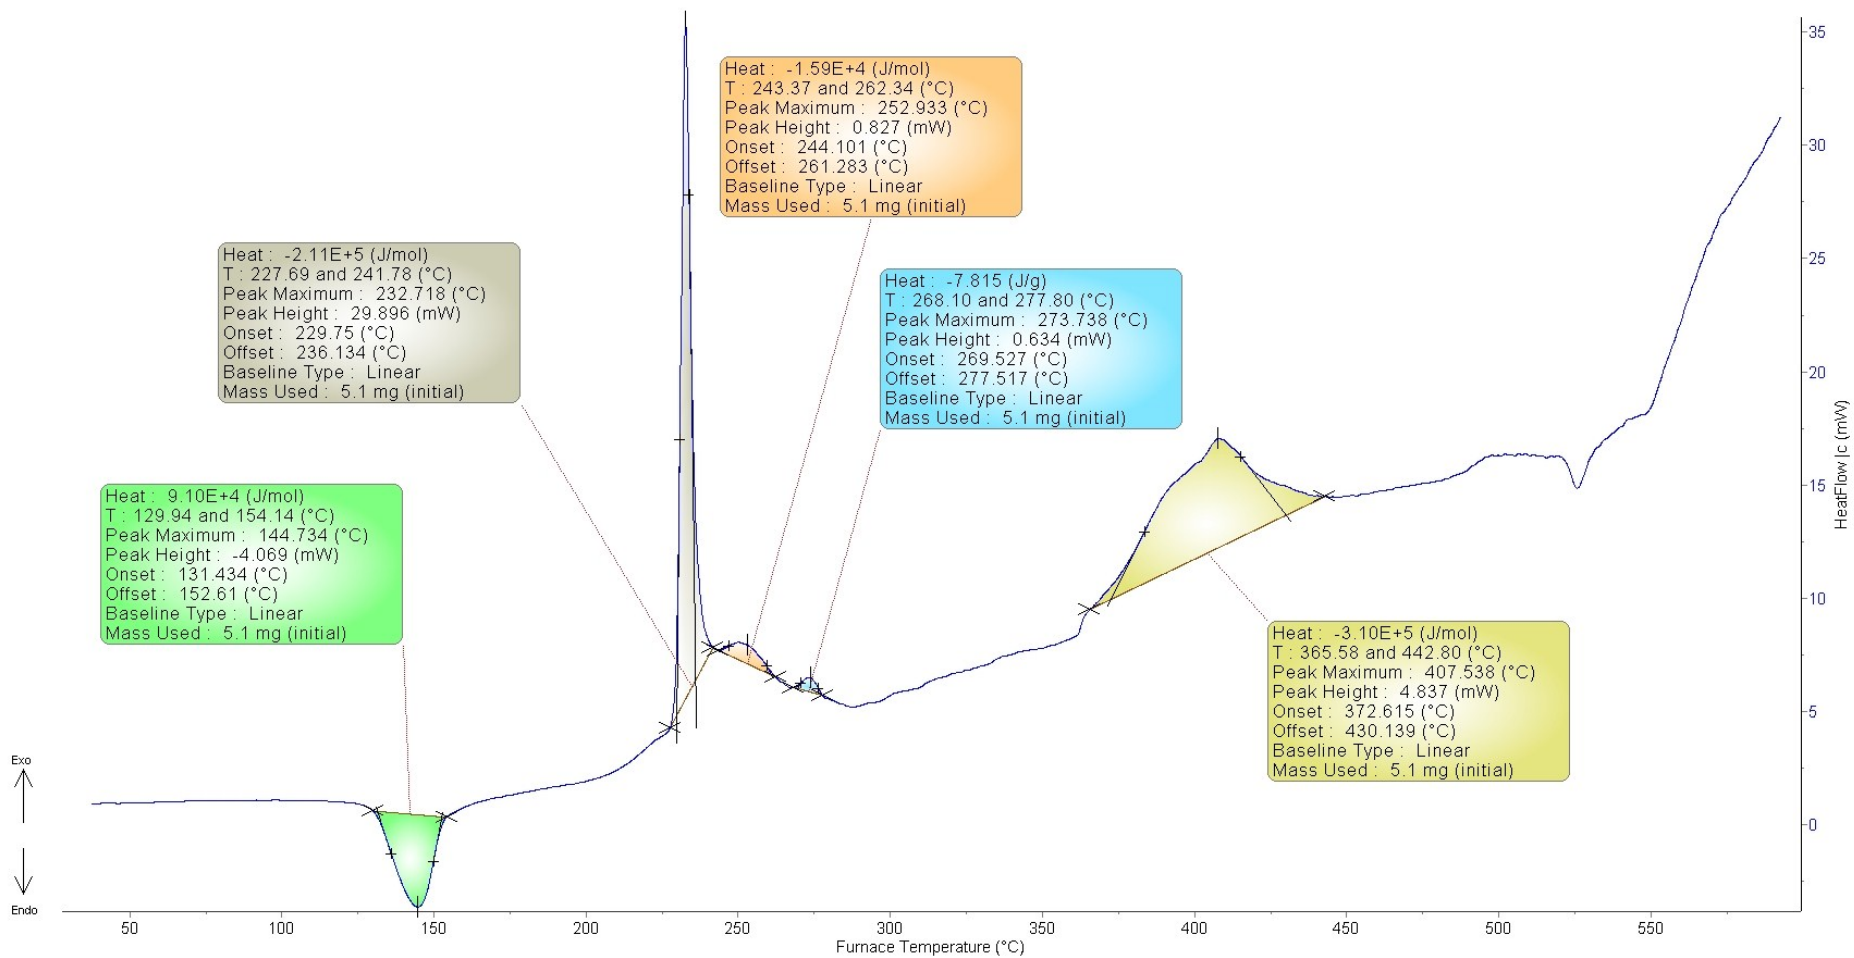

Figure S25. DSC plot for the complex 3a.

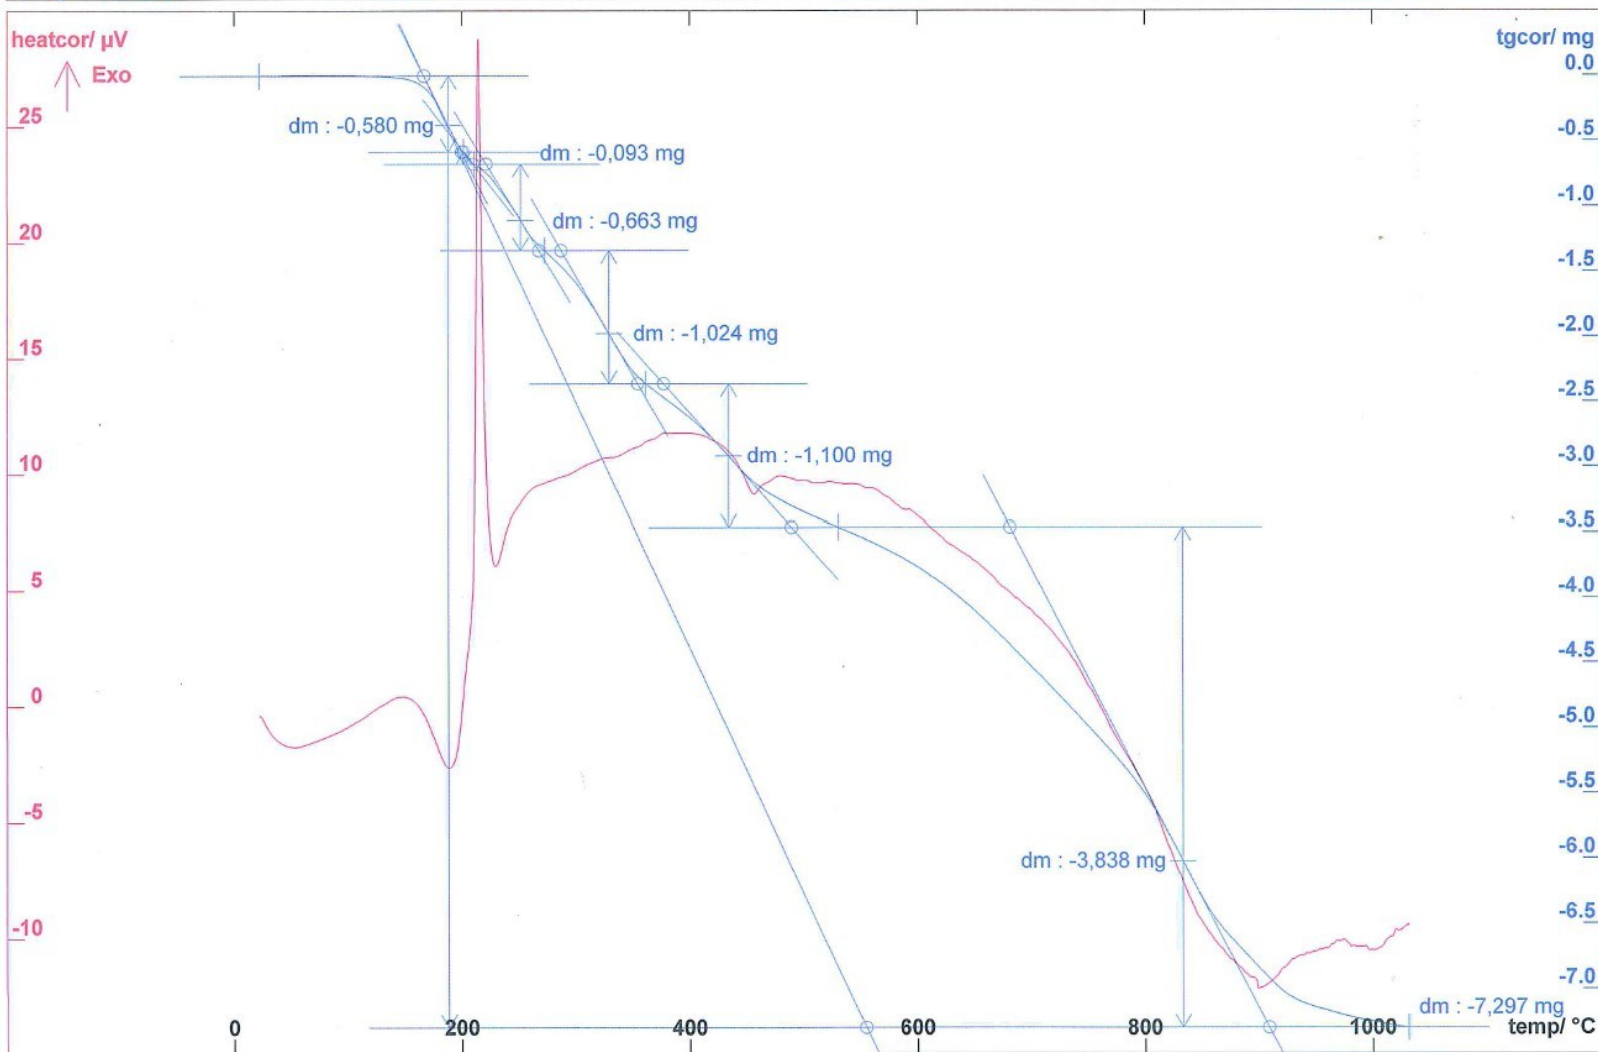

Figure S26. TG-DTA plot for the complex 4a.

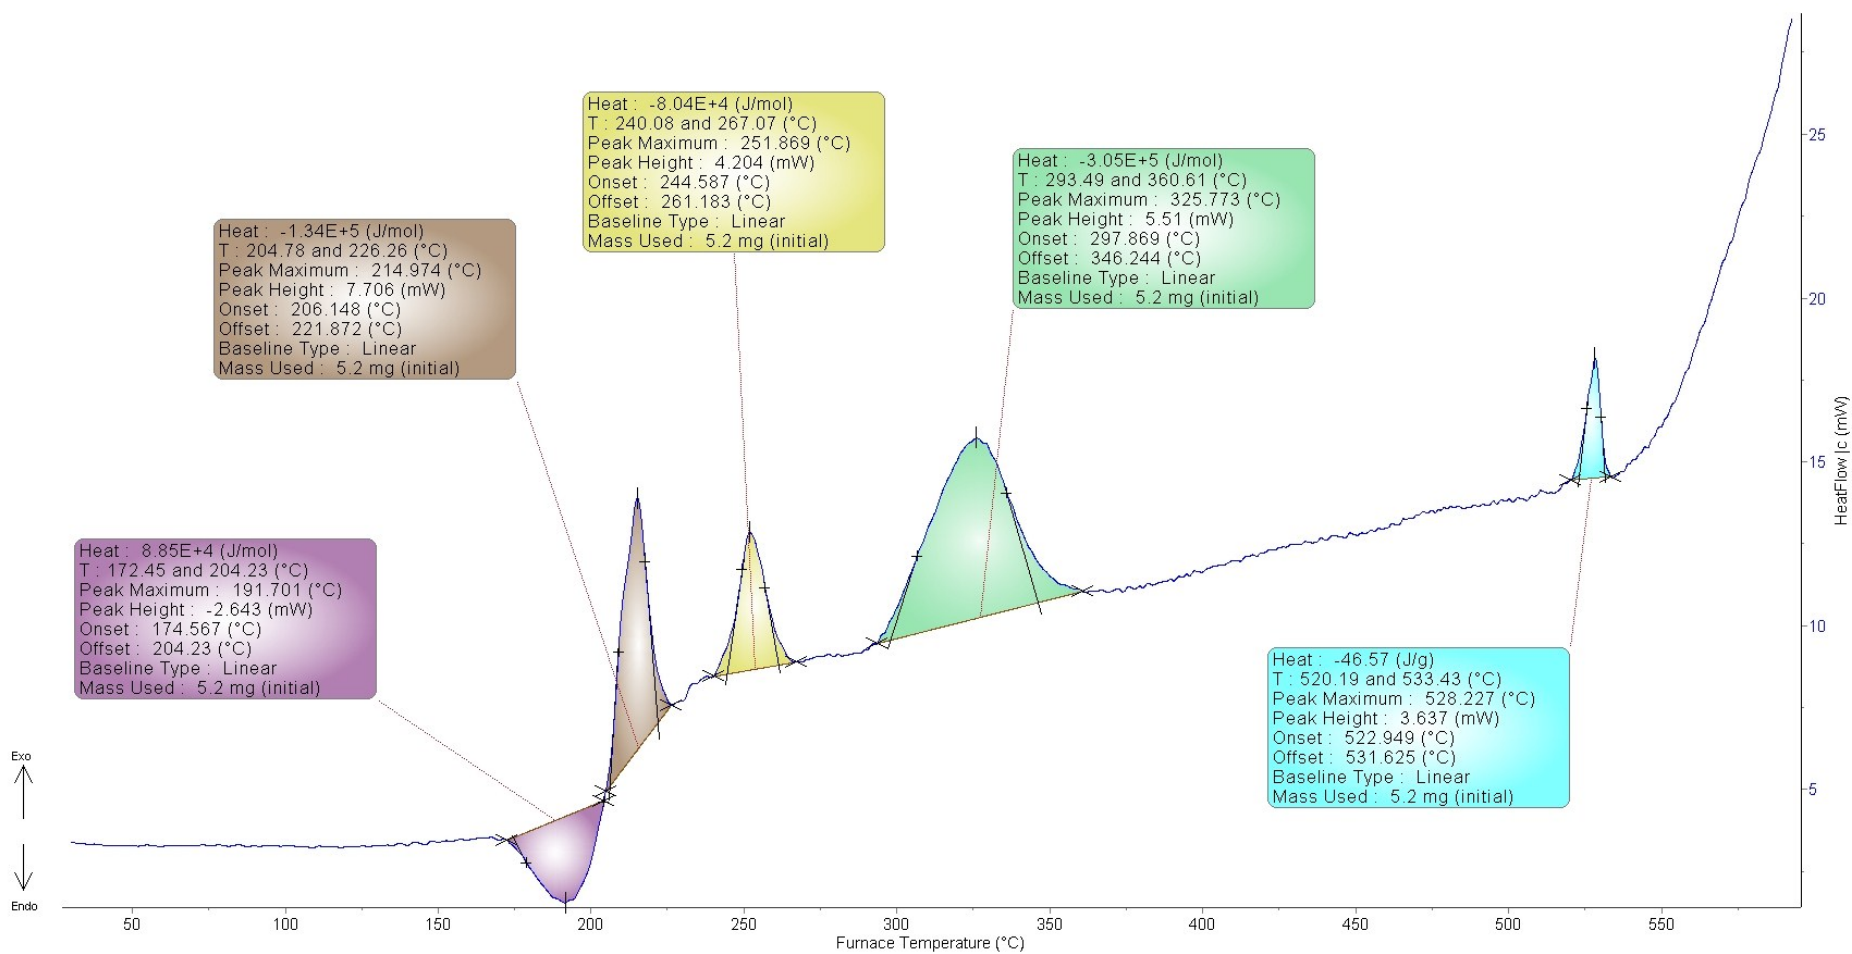

Figure S27. DSC plot for the complex 4a.

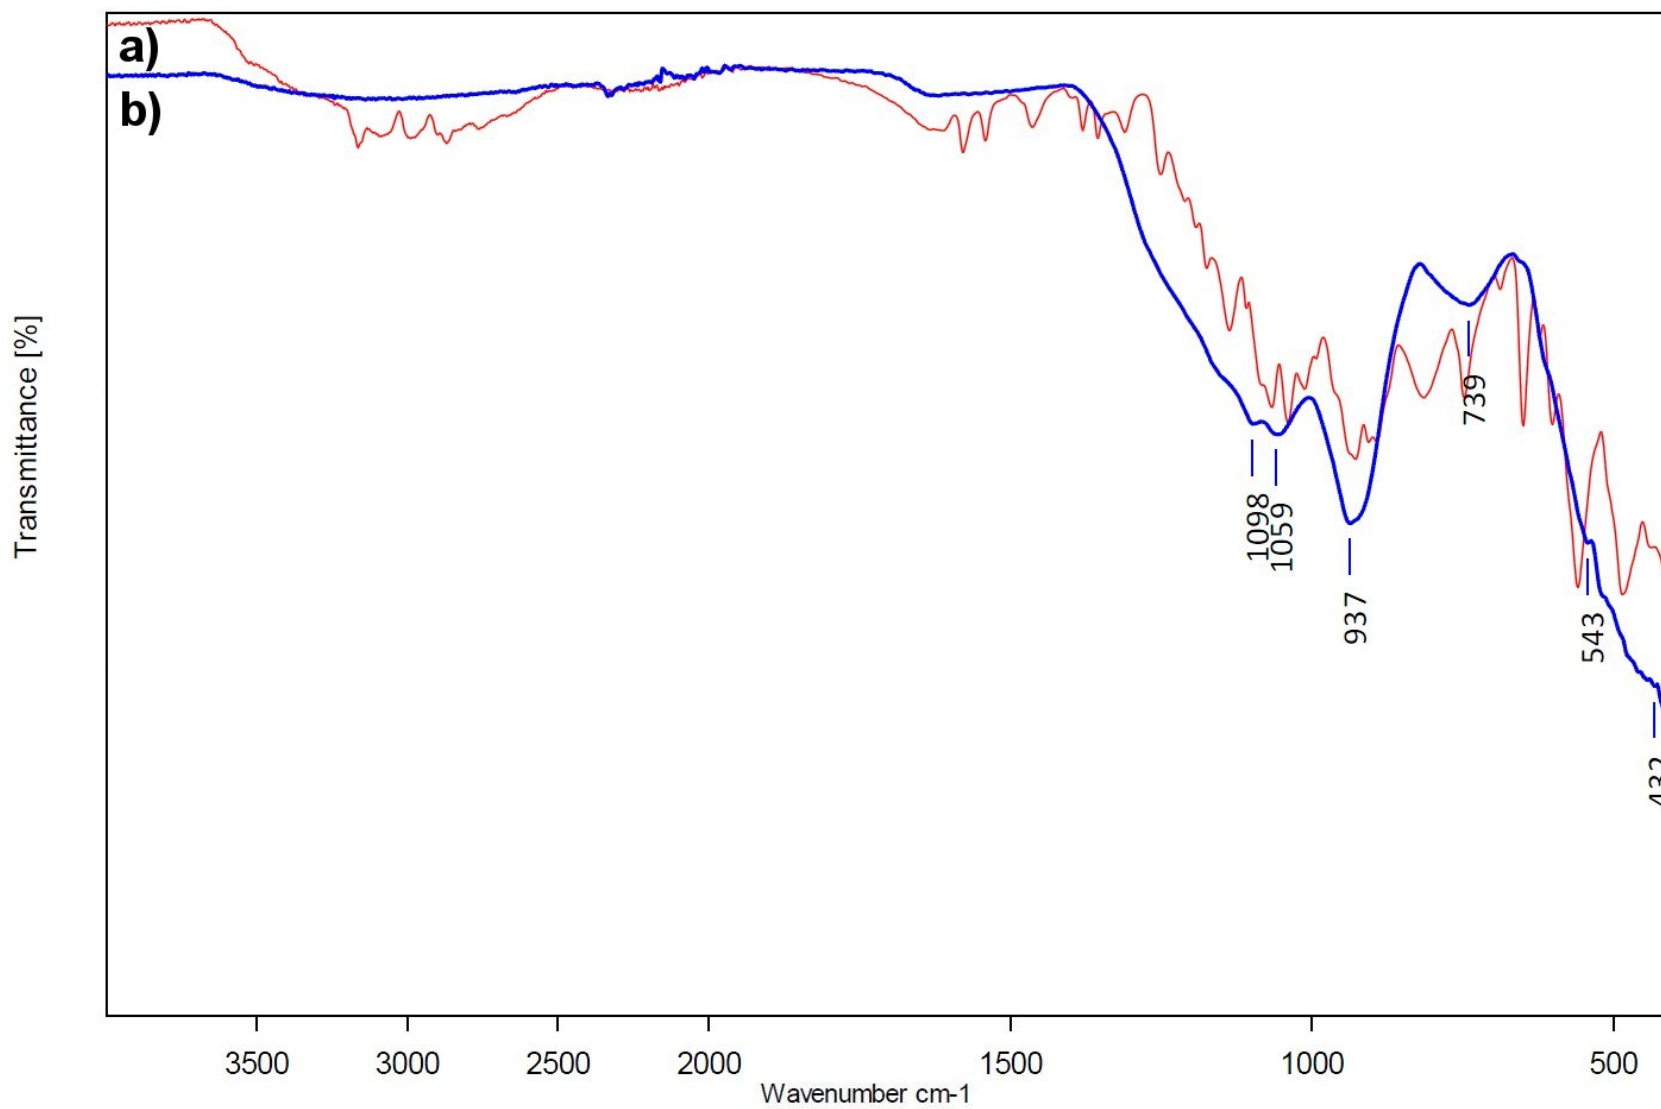

**Figure S28.** IR spectra of (a) crystalline complex **1a** and (b) solid obtained by heating sample of the complex up to 600 °C.



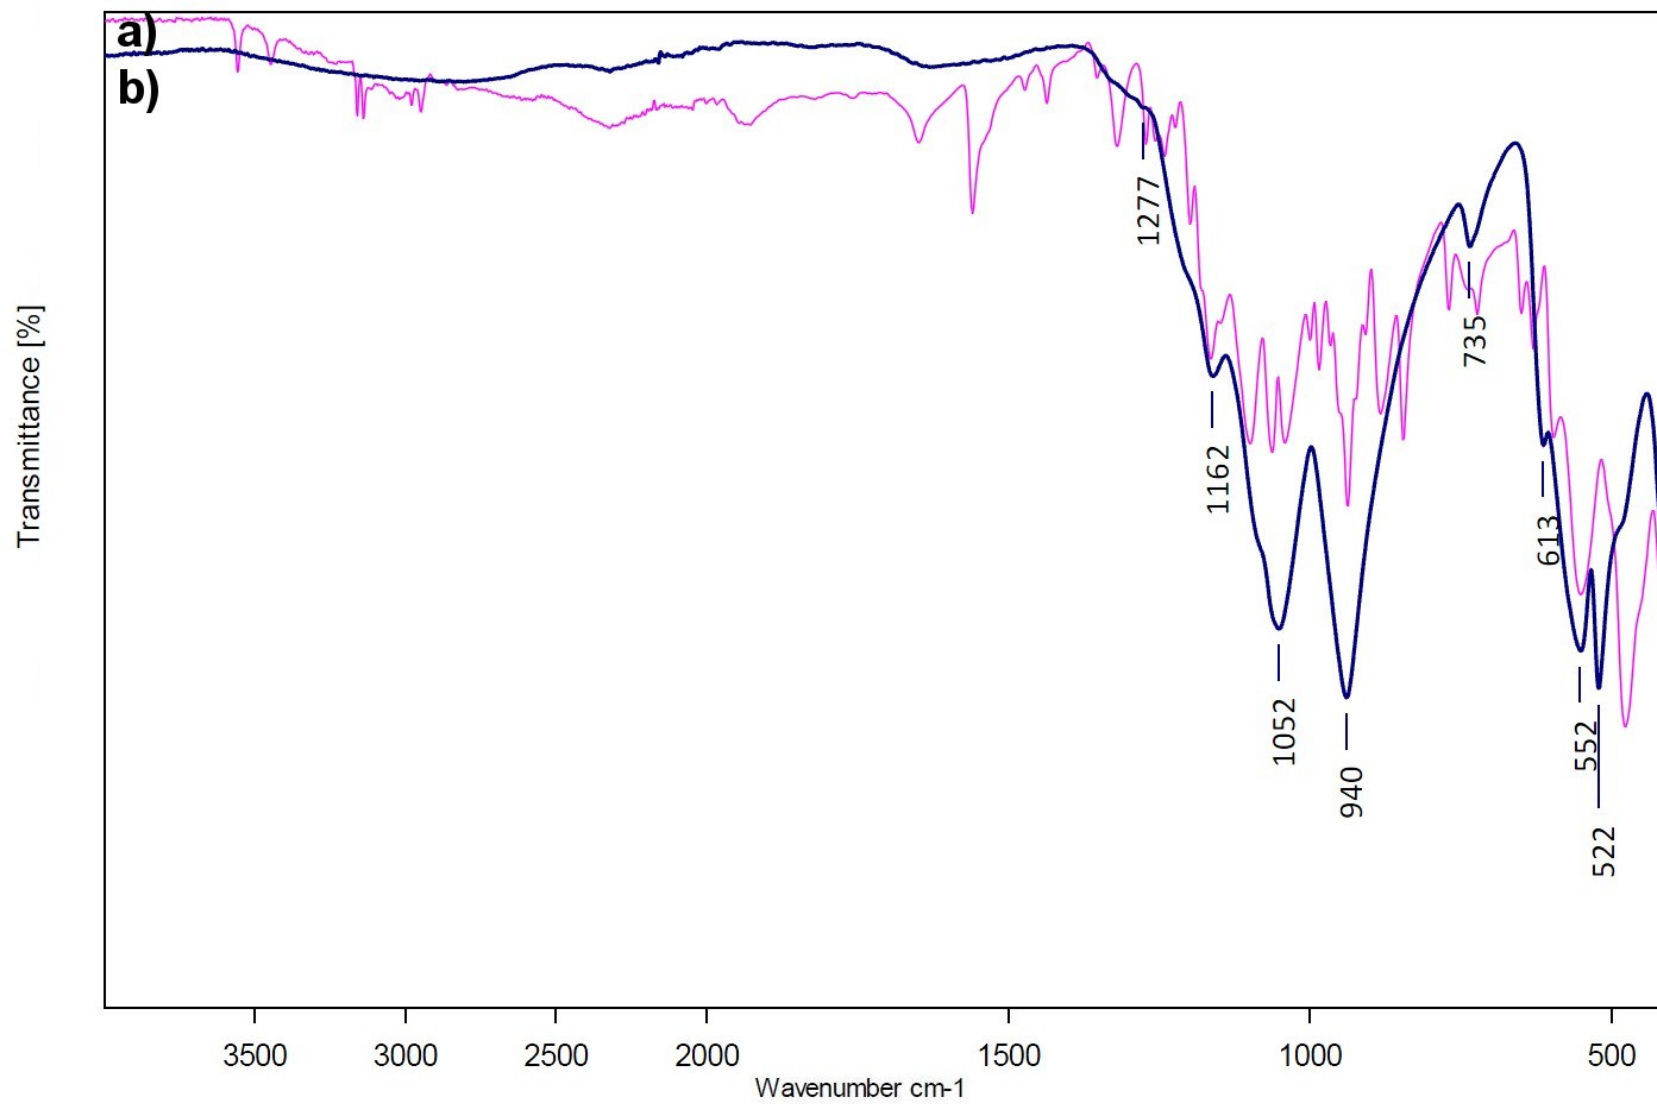

**Figure S29.** IR spectra of (a) crystalline complex **3a** and (b) solid obtained by heating sample of the complex up to 600 °C.

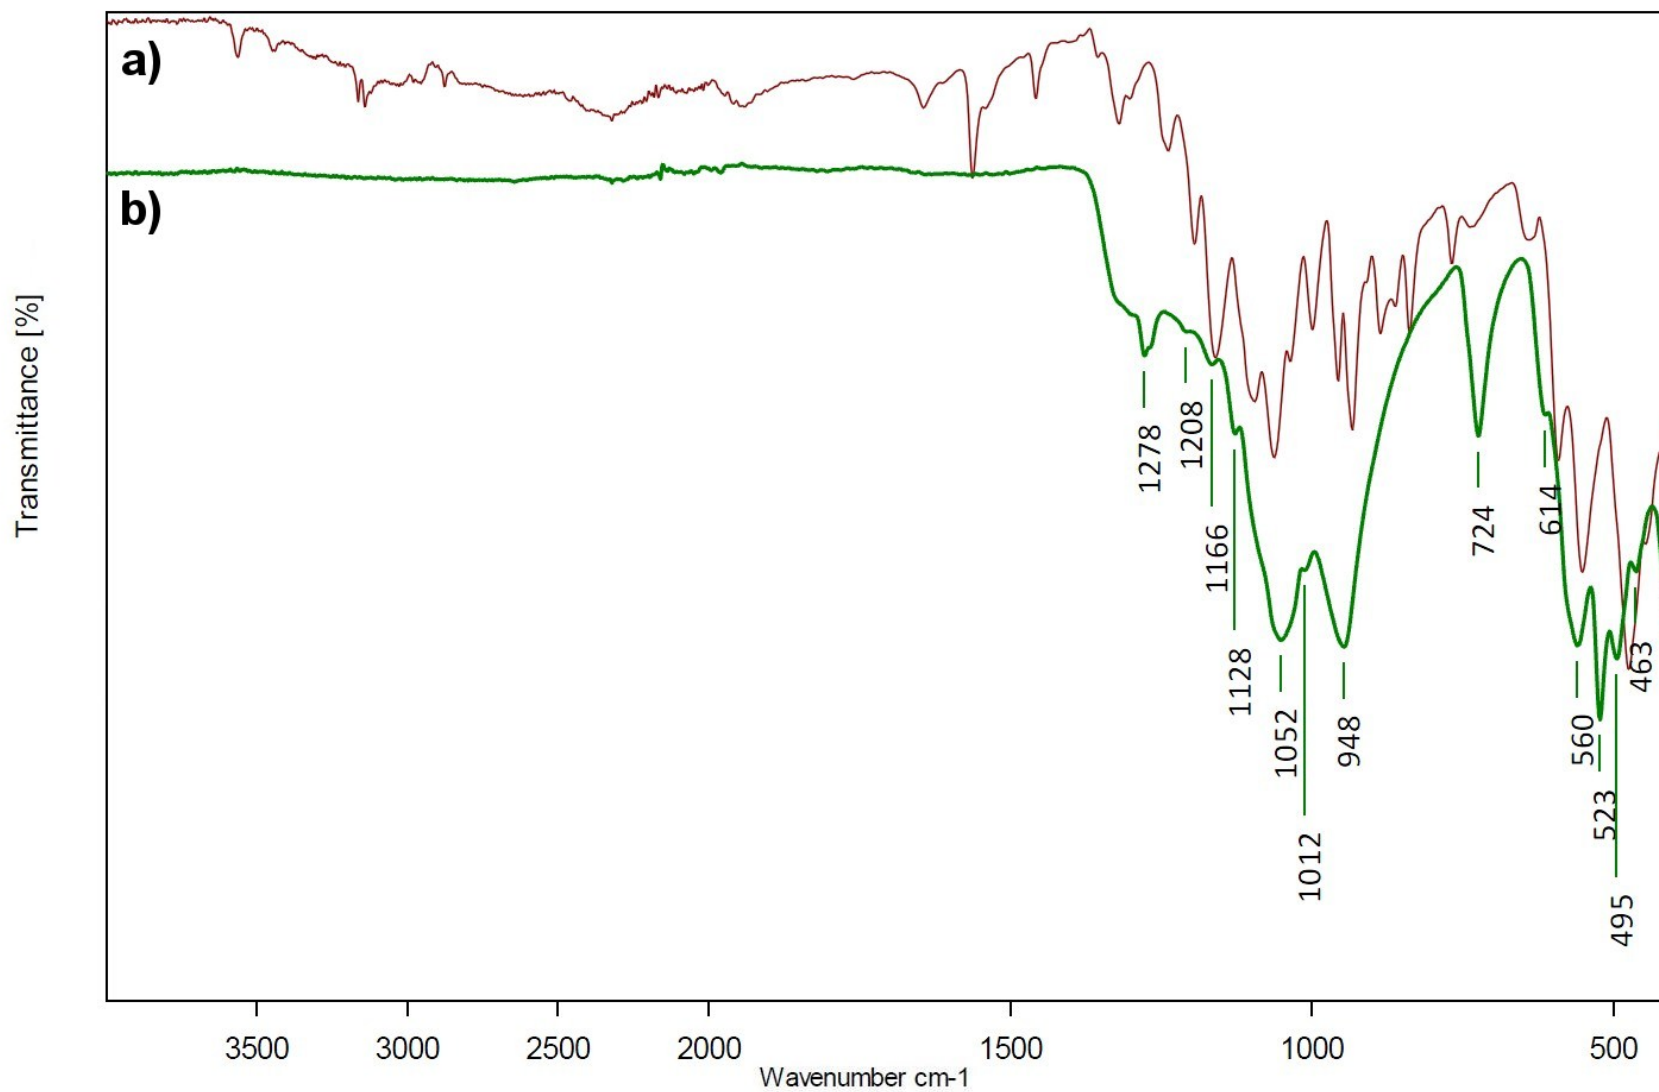

**Figure S30.** IR spectra of (a) crystalline complex **4a** and (b) solid obtained by heating sample of the complex up to 600  $^{\circ}\text{C}$ .
